# Supplementary material for: Results of a prospective, mixed methods study to assess feasibility, acceptability and effectiveness of TRIumPH (Treatment and Recovery In PsycHosis): an integrated care pathway for psychosis, compared to usual treatment
Source: PubMed Central journal article supplement — BMJ Open. 2020 Apr 29;10(4):e033711. doi: 10.1136/bmjopen-2019-033711 (PMC7213857; doi:10.1136/bmjopen-2019-033711), 2020-04-29
Supplement: bmjopen-2019-033711.draft_revisions.pdf [file bmjopen-2019-033711.draft_revisions.pdf]

# BMJ Open

BMJ Open is committed to open peer review. As part of this commitment we make the peer review history of every article we publish publicly available.

When an article is published we post the peer reviewers' comments and the authors' responses online. We also post the versions of the paper that were used during peer review. These are the versions that the peer review comments apply to.

The versions of the paper that follow are the versions that were submitted during the peer review process. They are not the versions of record or the final published versions. They should not be cited or distributed as the published version of this manuscript.

BMJ Open is an open access journal and the full, final, typeset and author-corrected version of record of the manuscript is available on our site with no access controls, subscription charges or pay-per-view fees (<http://bmjopen.bmj.com>).

If you have any questions on BMJ Open's open peer review process please email [info.bmjopen@bmj.com](mailto:info.bmjopen@bmj.com)

# BMJ Open

## Results of a multicentre study to assess feasibility, acceptability, and effectiveness of TRIumPH (Treatment and Recovery In Psychosis): Integrated Care Pathway for Psychosis

|                               |                                                                                                                                                                                                                                                                                                                                                                                                                                                                  |
|-------------------------------|------------------------------------------------------------------------------------------------------------------------------------------------------------------------------------------------------------------------------------------------------------------------------------------------------------------------------------------------------------------------------------------------------------------------------------------------------------------|
| Journal:                      | <i>BMJ Open</i>                                                                                                                                                                                                                                                                                                                                                                                                                                                  |
| Manuscript ID                 | bmjopen-2019-033711                                                                                                                                                                                                                                                                                                                                                                                                                                              |
| Article Type:                 | Research                                                                                                                                                                                                                                                                                                                                                                                                                                                         |
| Date Submitted by the Author: | 20-Aug-2019                                                                                                                                                                                                                                                                                                                                                                                                                                                      |
| Complete List of Authors:     | Rathod, Shanaya; Southern Health NHS Foundation Trust, Psychiatry Thorne, Kerensa<br>Graves, Elizabeth; Southern Health NHS Foundation Trust, Research and Development<br>Phiri, Peter; Southern Health NHS Foundation Trust<br>Asher, Carolyn; Southern Health NHS Foundation Trust<br>Griffiths, Alison; Wessex Academic Health Sciences Network<br>Read, Tracy; Dorset HealthCare NHS Foundation Trust<br>Kingdon, David; University of Southampton, Medicine |
| Keywords:                     | Adult psychiatry < PSYCHIATRY, Schizophrenia & psychotic disorders < PSYCHIATRY, Early Intervention, Integrated Care Pathways                                                                                                                                                                                                                                                                                                                                    |
|                               |                                                                                                                                                                                                                                                                                                                                                                                                                                                                  |

SCHOLARONE™  
Manuscripts

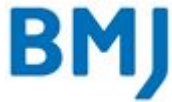

I, the Submitting Author has the right to grant and does grant on behalf of all authors of the Work (as defined in the below author licence), an exclusive licence and/or a non-exclusive licence for contributions from authors who are: i) UK Crown employees; ii) where BMJ has agreed a CC-BY licence shall apply, and/or iii) in accordance with the terms applicable for US Federal Government officers or employees acting as part of their official duties; on a worldwide, perpetual, irrevocable, royalty-free basis to BMJ Publishing Group Ltd ("BMJ") its licensees and where the relevant Journal is co-owned by BMJ to the co-owners of the Journal, to publish the Work in this journal and any other BMJ products and to exploit all rights, as set out in our [licence](#).

The Submitting Author accepts and understands that any supply made under these terms is made by BMJ to the Submitting Author unless you are acting as an employee on behalf of your employer or a postgraduate student of an affiliated institution which is paying any applicable article publishing charge ("APC") for Open Access articles. Where the Submitting Author wishes to make the Work available on an Open Access basis (and intends to pay the relevant APC), the terms of reuse of such Open Access shall be governed by a Creative Commons licence – details of these licences and which [Creative Commons](#) licence will apply to this Work are set out in our licence referred to above.

Other than as permitted in any relevant BMJ Author's Self Archiving Policies, I confirm this Work has not been accepted for publication elsewhere, is not being considered for publication elsewhere and does not duplicate material already published. I confirm all authors consent to publication of this Work and authorise the granting of this licence.

1 **Results of a multicentre study to assess feasibility, acceptability, and**  
2  
3 **effectiveness of TRIumPH (Treatment and Recovery In Psychosis): Integrated**  
4  
5 **Care Pathway for Psychosis**  
6  
7  
8  
9

10 Shanaya Rathod<sup>1\*</sup>, Kerensa Thorne<sup>1</sup>, Elizabeth Graves<sup>1</sup>, Peter Phiri<sup>1</sup>, Carolyn  
11  
12 Asher<sup>1</sup>, Alison Griffiths<sup>2</sup>, Tracy Read<sup>3</sup>, David Kingdon<sup>4</sup>  
13  
14  
15  
16

17 1 Southern Health NHS Foundation Trust, United Kingdom  
18

19 2 Wessex Academic Health Sciences Network, United Kingdom  
20

21 3 Dorset Healthcare University NHS Foundation Trust, United Kingdom  
22

23 4 University of Southampton, Southampton, United Kingdom  
24  
25  
26  
27  
28  
29  
30

31 **\*Corresponding author:** Dr Shanaya Rathod  
32

33 Email address: shanayarathod@nhs.net  
34

35 Phone: 023 8047 5373  
36

37 Address: Research Department, Clinical Trials Facility, Tom Rudd Unit, Moorgreen  
38  
39 Hospital, Southampton, SO30 3JB  
40  
41  
42  
43  
44  
45  
46  
47  
48  
49  
50  
51  
52  
53  
54  
55  
56  
57  
58  
59  
60

## Abstract

**Objectives:** We evaluated TRlumPH (Treatment and Recovery In Psychosis), a co-produced integrated care pathway that prescribes standards for access and interventions in first episode psychosis. This was a pragmatic, non-randomised, mixed methods study comparing an intervention (pathway) and comparator site to assess feasibility, acceptability and effectiveness of an integrated care pathway for psychosis

**Setting:** NHS Early Intervention in Psychosis (EIP) teams, one pathway implementation site and one comparator organisation.

**Participants:** All patients accepted into EIP services between 1 June 2014 – 31 May 2017 were followed up for one year.

**Outcome measures:** The controlled trial has evaluated the effect of TRlumPH (Intervention) with Care As Usual (Comparator). Quantitative data collection consisted of treatment, process and symptom measures to assess adherence to the features of the pathway and change against the comparator group. Qualitative measures consisted of questionnaires, interviews and focus groups to assess acceptability and satisfaction.

**Results:** Outcome measures were assessed at baseline, 12 and 24 months to measure if there was an effect and if so, whether this was sustained over time. Improvements in achievement of access and quality standards and time frames occurred in the pathway area from a generally low baseline.

### Conclusions:

Improvements in achievement of access and quality standards and time frames occurred in the pathway area from a generally low baseline.

## Strengths and Limitations

- Robust methodology used for development of the pathway
- This is the first and only evaluation of a psychosis care pathway
- Baseline differences between the areas affected interpretation of the results
- Results will be generalizable to NHS and managed care organisations
- Financial and human resource limitations may have impact on results

**Study registration:** UK Clinical Research Network Portfolio: 19187

**Keywords:** Integrated Care Pathway, psychosis, access, early intervention, co-production

**Word count:** 3572

## Background

Schizophrenia is listed as the 8<sup>th</sup> leading cause of DALYs worldwide in the age group 15 - 44 years in the World Health Report<sup>1</sup>. In addition to the direct cost, there is a considerable burden on the relatives<sup>2</sup>. Life expectancy is reduced by approximately 15-20 years, mostly because of physical health problems<sup>3</sup>.

The longer the duration of psychosis prior to the start of treatment (DUP), the worse the outlook especially for social functioning and recovery<sup>4,5</sup>. DUP is the strongest predictor of symptom severity and prognosis<sup>6</sup>. Evidence from trans-cultural and international research suggests that DUP ranges between 364 and 721 days<sup>5,6</sup> and so reducing DUP is of individual, national and international importance<sup>1</sup>.

The UK government strategy 'No Health Without Mental Health' acknowledged that more must be done to address the disparity in care for people experiencing psychosis. It highlighted the importance of prevention, early detection, and support for evidence-based models such as Early Intervention in Psychosis (EIP) services. The National Access and Waiting Time (AWTS) standard for psychosis<sup>7</sup> announced in the UK from 1 April 2016 required that more than 50% of people experiencing a first episode psychosis should commence a NICE (National Institute of Health and Care Excellence) recommended package of care within two weeks of referral to secondary care services. The Five Year Forward View (NHS England)<sup>8</sup> recommended development of standardized care pathways for every major mental health condition.

Evidenced-based integrated pathways provide a standardized framework for good clinical practice, reduce variation in care and have improved outcomes for patients

1 through providing timely access and intervention. Standardized pathways improve  
2 quality by improving multidisciplinary communication with different care agencies  
3 using care planning, and improve patient satisfaction<sup>9</sup>. NICE has formulated quality  
4 standards for treatment of schizophrenia and psychosis<sup>10</sup>, but does not prescribe  
5 timeframes.  
6  
7  
8  
9  
10  
11  
12

13 TRlumPH (Treatment and Recovery In Psychosis) is an integrated care pathway for  
14 psychosis that prescribes time frames around access and clinical interventions as  
15 developed in the UK<sup>11</sup>. The work has used a similar approach to that taken to  
16 improve care in other health areas like stroke care, where there has been a  
17 demonstrable improvement in outcomes for patients and carers. This new psychosis  
18 pathway aims to reduce the impact of disease and promote recovery by ensuring  
19 that every individual gets the best evidence-based care at the right time and in the  
20 right place.  
21  
22  
23  
24  
25  
26  
27  
28  
29  
30  
31  
32

33 In developing the pathway, a multi-pronged approach has been used, using i)  
34 intelligence from information, ii) co-production with individuals with lived experience  
35 of mental illness and their carers, and iii) engagement with clinicians and other  
36 stakeholders including commissioners, primary care and third sector organisations.  
37 The approach has used a robust methodology which can be adapted and adopted  
38 nationally and internationally<sup>12</sup>.  
39  
40  
41  
42  
43  
44  
45  
46

47 Therefore, the pathway goals are to treat the symptoms as early as possible, provide  
48 skills to patients and their families, maintain the improvement over a period, prevent  
49 relapses and reintegrate the individuals into the community so that they can lead as  
50 normal a life as possible.  
51  
52  
53  
54  
55  
56  
57  
58  
59  
60



## Study objectives

The objective of this study was to assess the feasibility, acceptability and effectiveness of the TRlumPH psychosis care pathway.

## Methods

### Study design

This is a mixed method pragmatic and non-randomised study comparing the intervention (pathway) and comparison area (that had treatment as usual) to evaluate feasibility, acceptability and effectiveness of an integrated care pathway, TRlumPH for psychosis. Both qualitative and quantitative data were collected and analysed. Ethics approval was obtained from East of Scotland Research Ethics Service (REC Ref no: LR/15/ES/0091).

### Setting

The study originally had Early Intervention in Psychosis (EIP) teams from two pathway implementation and two comparator organisations. However, one pathway and one comparator site withdrew in the early stages due to an inability to provide necessary data.

The NHS Trust implementing the pathway covers a population of 1.3 million and has four EIP services. The comparator trust covers a population of 780 000 and had two EIP teams initially which were amalgamated during the study period. The areas were predicted to have an incidence of psychosis, respectively, of 110 and 54 patients (Psymaptic.org). The EIP teams were working to principles originally set out in the NHS Plan (2000).

## **The intervention**

TRlumPH is an integrated care pathway for psychosis that emphasises the importance of timely access and interventions (see Diagram 1). The development, design and details of this pathway have been described in detail in the protocol paper<sup>12</sup>.

## **Comparator area**

Participants in the comparator area received treatment as usual (TAU). TAU had been variable in different organisations as some had EIP teams and some did not. It usually consisted of care coordination and out patient appointments when needed. Access to psychological treatments and physical health interventions had been variable. The Access and Waiting Time target was launched in April 2016 after the study started and will have influenced treatment as usual in each area.

## **Patient and Public Involvement**

Co-production workshops were held with patients, carers and clinicians to develop the pathway and key outcomes areas and a service user researcher sat on the study team. For further details see the previously published protocol<sup>12</sup>.

## **Outcome measures**

Feasibility and acceptability were assessed through both qualitative and quantitative data collection regarding recruitment, retention and adherence to the process. This included timeliness of access and intervention, type of intervention offered including medication, physical health assessment (within 3 months in accordance with NICE

1 quality standard), psychological intervention (within 6 months), and others. The  
2 reasons for deviation from the pathway were recorded. Additionally, satisfaction and  
3 acceptability were assessed using questionnaires, interviews and focus groups. This  
4 consisted of the following qualitative methods; patient experience (using specifically  
5 designed patient experience focus groups/interviews), staff experience (staff  
6 questionnaires and focus groups designed to measure the impact of the pathway on  
7 staff experience), and carer experience (using carer focus groups/interviews).

8 Effectiveness was assessed through data collection in the following areas; process  
9 outcomes, physical health measures, acute care usage, interventions offered,  
10 clinical, functional and recovery outcomes. Impact of pathway on functioning and  
11 recovery outcomes (e.g. physical health), clinical outcomes (Health of Nation  
12 Outcome Scores - HoNOS), change in service use (e.g. routinely collected data on  
13 crisis, admissions, detentions, Emergency Department attendances) was collected.

14 All outcome measures were assessed at baseline and after 12 and 24 months  
15 (except patient and carer experience which was at 12 and 24 months).

### 16 **Sample size**

17 As this is a prospective, feasibility study, no a priori power and sample size  
18 calculations were performed or required as data for all available patients and staff  
19 during the study period was used.

### 20 **Data Collection**

1 Baseline data was collected for the period 1 June 2014 – 31 May 2015. The pathway  
2 was launched on 1 June 2015 and disseminated to four EIP teams in the intervention  
3 organisation. Data was collected over the subsequent two-year period on every  
4 patient that was referred to and accepted by the EIP teams in participant  
5 organisations.  
6  
7  
8  
9  
10  
11  
12  
13  
14  
15  
16

### 17 **Qualitative methods**

18 Staff, patients and carers were approached via the mental health teams they were  
19 currently involved in. Patients and carers showed a preference to semi-structured  
20 interviews rather than attending offered focus groups. All focus groups and  
21 interviews were audio recorded, transcribed and then coded and analysed using  
22 thematic analysis<sup>13</sup>. Thematic analysis was inductive using themes developed from  
23 the data produced by the structured scripts and remained at a semantic level to allow  
24 for a description of the views reported. Staff were also invited to complete a  
25 questionnaire to explore the impact of the pathway on staff experience and enable  
26 comparisons across the three time points.  
27  
28  
29  
30  
31  
32  
33  
34  
35  
36  
37  
38  
39  
40  
41  
42

### 43 **Statistical Analysis**

44 Continuous normal data was summarised by mean and standard deviation, with  
45 comparisons to baseline made using t-tests. Continuous data that is non-normal as  
46 tested by Kolmogorov-Smirnov or Shapiro-Wilk tests, was presented by median and  
47 interquartile range (IQR) and compared using Mann-Whitney U test. Categorical  
48 variables were presented as n (%) and compared using Chi-Square or Fisher's Exact  
49 test as appropriate. However, no statistical comparisons were undertaken when the  
50  
51  
52  
53  
54  
55  
56  
57  
58  
59  
60

1 event rates in most groups were <5.  $p < 0.05$  was assumed to indicate statistical  
2  
3 significance. Missing data was excluded on a case-by-case basis. Statistical  
4  
5 analyses were undertaken using IBM SPSS Statistics 19 and R 3.4.2.  
6  
7  
8  
9  
10  
11  
12  
13  
14

### 15 **Safety Assessments**

16  
17 The development of the pathway was tailored to the needs of people with psychosis  
18  
19 as a service improvement based on evidence-based practice. No adverse events  
20  
21 were therefore expected to be identified as a direct result of implementation of the  
22  
23 pathway although analysis of results would show where success or failure had  
24  
25 occurred.  
26  
27  
28  
29  
30  
31  
32  
33

### 34 **Results**

35  
36 The participant information and demographic data is presented in Table 1. The  
37  
38 demographic characteristics of individuals in both comparator and pathway arm was  
39  
40 broadly similar throughout the study period, with around 3 in 5 of subjects being  
41  
42 male, and the majority being of White Caucasian ethnicity, unemployed and residing  
43  
44 in mainstream housing.  
45  
46  
47  
48  
49

50 In both arms, the most common source of referral to EIP services was primary care,  
51  
52 making up between 55 to 63% of referrals, followed by other mental health services  
53  
54 and then Emergency Departments.  
55  
56  
57  
58  
59  
60

1 Table 1 here  
2  
3  
4  
5  
6  
7  
8  
9  
10  
11  
12  
13  
14

## 15 **Waiting times**

16  
17  
18  
19 Table 2 here  
20  
21  
22  
23

24 In the pathway site, waiting times for EIP assessment from both EIP referral and  
25 central triage points (most commonly a community mental health team) reduced  
26 significantly compared with baseline, from median 11 to 7 days, and from 20 to 11  
27 days respectively ( $p < 0.0001$  for both). Conversely, in the comparator arm waiting  
28 time from EIP referral to assessment increased significantly from 7 to 12 days  
29 ( $p < 0.0001$ ) and was unchanged from central triage to assessment at 33 days  
30 ( $p = 0.56$ ). This suggests an improvement in assessment speed following referral to  
31 services in the intervention site.  
32  
33  
34  
35  
36  
37  
38  
39  
40  
41  
42  
43  
44

45 The pathway site also saw significantly reduced waiting times for allocation to and  
46 engagement by care co-ordinator, Multidisciplinary team (MDT) discussions, risk  
47 assessment completion and discharge of service users found unsuitable for the  
48 service on assessment ( $p < 0.0001$  for all). There was no statistically significant  
49 difference in the time to medical formulation or CPA (Care Programme Approach). In  
50 the comparator arm, time to allocation and engagement by care co-ordinator  
51  
52  
53  
54  
55  
56  
57  
58  
59  
60

1 remained unchanged at median 0 days throughout the study. Although not  
2 significantly different from baseline in year 1, by year 2 time to MDT discussion and  
3 to risk assessment completion had both increased significantly ( $p < 0.0001$  for both).  
4  
5  
6  
7  
8  
9

10 The numbers of patients accepted onto the EIP case load were much higher than  
11 expected in the comparator site, but this reduced to nearer the expected levels  
12 during the course of the project. The pathway site started below but rose to just  
13 above expected levels.  
14  
15  
16  
17  
18  
19

20 Reasons for discharge from EIP services remained similar in the comparator arm  
21 throughout the study. However, in the pathway site there was a significant change,  
22 seemingly led by an increase in the number of unsuitable referrals to the service,  
23 which increased from 55% to 81%. Non-acceptance was also broadly similar as it  
24 was agreed with sites that 'did not meet EIP criteria' and 'discharged on professional  
25 advice' effectively meant the same thing.  
26  
27  
28  
29  
30  
31  
32  
33  
34  
35  
36  
37

### 38 **Physical health assessments**

39 Table 3 here  
40  
41  
42  
43  
44

45 Both arms of the study saw significant improvements in the proportion of individuals  
46 receiving assessments of their general physical health, substance use, alcohol use  
47 and weight, having their bloods taken and given ECGs, but at much higher levels in  
48 the pathways area. Assessment of smoking status only increased significantly in the  
49 intervention arm. While measurements of pulse and blood pressure assessments  
50 increased in both arms, they were significant in the comparator arm. Assessment of  
51  
52  
53  
54  
55  
56  
57  
58  
59  
60

1 waist measurement increased significantly in the pathway site whilst decreasing  
2 significantly in the comparator arm. Finally, neither arm significantly increased the  
3 number of individuals receiving a full 8-pt NICE recommended health check within 8  
4 weeks of EIP assessment.  
5  
6  
7  
8  
9

## 10 11 12 13 14 15 **Interventions**

16  
17 The proportion of individuals being offered CBT (Cognitive Behaviour Therapy)  
18 increased significantly in the comparator arm from 1% to 22% ( $p < 0.0001$ ) and was  
19 matched with a significant increase in taking up CBT intervention from 0% to 7%  
20 ( $p = 0.010$ ). The pathway site did not see any significant change in either of these  
21 factors however throughout the period, CBT for psychosis and family work for  
22 psychosis were much more likely to be offered.  
23  
24  
25  
26  
27  
28  
29  
30  
31

32  
33 Prevalence of individuals receiving any of the listed interventions increased in both  
34 the pathway (83% to 94%,  $p = 0.0071$ ) and comparator arms (57% to 81%,  
35  $p < 0.0001$ ), as did engagement (75% to 90%,  $p = 0.039$  and 57% to 79%,  $p < 0.0001$   
36 respectively) from baseline to year 2.  
37  
38  
39  
40  
41  
42  
43  
44

45 The pathway site saw increases in the proportion of participants receiving carer  
46 support (35% to 68%,  $p < 0.0001$ ) and medication (54% to 73%,  $p = 0.027$ ), although  
47 neither of these changed significantly in the comparator arm. Receipt of collaborative  
48 care planning increased significantly in the pathway site (32% to 69%,  $p < 0.0001$ )  
49 whilst the comparator site saw a decrease (31% to 1%,  $p < 0.0001$ ). Prevalence of  
50 physical health interventions also decreased in the comparator arm (26% to 15%,  
51  
52  
53  
54  
55  
56  
57  
58  
59  
60



1 p<0.0001) but did not change significantly in the pathway site, remaining low (3% to  
2  
3  
4 6%, p=0.58). Receipt of vocational support increased substantially in the pathway  
5  
6 site (20% to 72%, p<0.0001) and somewhat in the comparator arm (20% to 39%,  
7  
8 p=0.0023). However subsequently, after six months, there was a much higher take-  
9  
10 up rate with over 80% in the pathway and over 70% in the comparator site.  
11  
12  
13  
14

### 15 **Acute care**

16  
17  
18  
19  
20 Table 4 here

21  
22 There was a substantial contrast in the numbers of patients who had been admitted  
23  
24 to hospital at the point of referral, much higher in the pathway area compared to  
25  
26 comparator but reducing over time. Further admissions were low in both with neither  
27  
28 arm seeing a significant change in the prevalence of acute mental health  
29  
30 admissions, in the time to being admitted or in the time to discharge. Similarly, the  
31  
32 number of EIP participants subject to MHA section did not change significantly,  
33  
34 although there was a tendency towards a decrease in the intervention arm (36% to  
35  
36 33% to 27%, p=0.58). In both arms, the number of EIP service users attending  
37  
38 Emergency Department (ED) or general hospital within a year was low. There were  
39  
40 no significant changes over time.  
41  
42  
43  
44  
45  
46  
47

### 48 **Crisis planning**

49  
50 In the pathway site, the proportion of participants having a crisis plan completed  
51  
52 reduced significantly (51% to 35%, p=0.032), occurring alongside a decrease in the  
53  
54 time to crisis plan completion (50.0 to 12.5 weeks, p<0.0001). Conversely, in the  
55  
56 comparator arm the proportion of participants having a crisis plan completed  
57  
58  
59  
60

1 increased significantly (49% to 67%,  $p=0.00023$ ), while the time to crisis plan  
2 completion increased but non-significantly (8.0 to 12.0 weeks,  $p=0.10$ ).  
3  
4  
5  
6  
7  
8  
9  
10  
11  
12  
13  
14

### 15 **Clinical and social outcomes**

16  
17 Table 5 here

18  
19 These were assessed by extracting the data routinely collected using the Health of  
20 the Nation Outcome Scales (HoNOS). There were significant reductions over the  
21 two-year period in 'problems with relationships' ( $p=0.013$ ) and 'problems with  
22 occupation and activities' ( $p=0.037$ ) in the pathways group and in 'problems with  
23 activities of daily living' ( $p=0.04$ ) in the comparator site. The latter site however had  
24 substantial amounts of missing data. There was no significant difference in  
25 reductions in 'problems with delusions and hallucinations' between sites.  
26  
27  
28  
29  
30  
31  
32  
33  
34  
35  
36  
37

### 38 **Criminal justice system contact**

39  
40 The number of participants having contact with the criminal justice system decreased  
41 significantly in the pathway site (22% to 3%,  $p<0.0001$ ) whilst increasing significantly  
42 in the comparator site (14% to 21%,  $p<0.0001$ ). Criminal convictions were rare in  
43 both study arms, and were observed to decrease very slightly, (from 1% to 0% and  
44 3% to 1% in the pathway and comparator sites respectively) however statistical  
45 testing was not performed due to very low event numbers.  
46  
47  
48  
49  
50  
51  
52  
53  
54  
55

### 56 **Discharge and death**

1 Discharge from services once accepted by EIP teams within a year was relatively  
2 low although disengagement remained a concern. It reduced in pathways site (18 to  
3 11%) and remained stable in comparator (10% to 12%). There was one death  
4 occurring to a participant within a year of EIP assessment.  
5  
6  
7  
8  
9

### 10 **Results from staff and patient interviews and focus groups**

11 Across the two years, 64 staff in intervention site reported that the psychosis  
12 pathway appeared to be beneficial, well embedded and a positive change with good  
13 team working within the teams and with other services. However, they found  
14 workload to be high and had some difficulties getting the right staff skills mix in  
15 teams to deliver all the needed interventions. They also noted that often  
16 interventions were offered but were not always completed due to patient's ability to  
17 engage with them. Additionally, they worried about future changes being  
18 implemented in addition to their current workload. They felt by year 2 that they were  
19 more able to adapt the pathway to individuals' needs which they saw as important  
20 rather than a prescriptive measure.  
21  
22  
23  
24  
25  
26  
27  
28  
29  
30  
31  
32  
33  
34  
35  
36  
37  
38  
39  
40  
41

42 Patients (14 participants) in intervention site reported that they were generally  
43 satisfied with being seen quickly and developed good relationships with the staff  
44 members. They found appointments helpful and felt they gained useful skills.  
45 However, they also reported that at times there was inconsistencies in the staff they  
46 saw and out of hours services could be improved. Carers views (7) in intervention  
47 site appears to improve from year 1 to year 2 with more positive reports about the  
48 team and services than at year 1 however at both time points the sample was small.  
49  
50  
51  
52  
53  
54  
55  
56  
57  
58  
59  
60

## Results from staff questionnaires

In total 1,680 questionnaires were completed by staff members in the intervention and control arm across the three time points. As can be seen from Supplementary Table 1 there was no significant change in staff experience across the time points or between the sites. This may be due to all staff members with adult mental health services being eligible to complete this questionnaire. This was done to capture the experience of staff referring into services and caring for services users with psychosis in services such as hospital settings. The lack of change seen in either site may have therefore been a result of the impact of the pathway being less apparent across all staff in adult mental health services. Overall staff members were reporting that they felt they were able to adequately support people experiencing psychosis in their services.

## Discussion

This comparison study provides evidence that the introduction of an integrated psychosis care pathway led to improvements in access to EIP and implementation of quality standards, especially for physical health care in comparison with an area which did not implement the pathway with generally positive staff, service user and carer responses. However, there were pre-existing differences between the sites which influenced the comparison. Prior to the project, the intervention area had dismantled three out of four EIP teams and integrated them into community mental health teams. At the beginning of the project, the area reintroduced EIP teams in contrast to the comparator area which had maintained specialist teams. A marked

1 difference in referrals occurred in each area with movement in both towards  
2  
3 predicted levels of patients accepted by EIP teams.  
4  
5  
6  
7

8 Time to assessment improved in the pathway area and remained within the target in  
9  
10 comparator site. Referral from Central Triage Point though was relatively high  
11  
12 especially in comparator area, as found by Birchwood and colleagues<sup>14</sup> and this  
13  
14 remains a very important area for attention. Meeting of quality standards increased  
15  
16 substantially in the intervention area, but was more variable and reached lower  
17  
18 levels in the comparator area. This was especially noticeable for physical health  
19  
20 standards, although the full set of NICE recommendations was only met in under  
21  
22 10% within 3 months of acceptance. In the pathway group, offering of CBT for  
23  
24 psychosis was relatively high throughout although take up within 6 months was low.  
25  
26 However, by 2 years, this was considerably higher. There was an increase in offering  
27  
28 of CBT and family work in comparator area from a very low base which had been  
29  
30 due to a lack of fully trained therapists. This seems an area where implementation of  
31  
32 the quality standards through a pathway process be especially effective. Family  
33  
34 intervention, carer and employment support were all offered to a greater extent in  
35  
36 pathway area and take up increased over the period.  
37  
38  
39  
40  
41  
42  
43  
44

45 The changes in teams were reflected in the results as patients accepted onto case  
46  
47 load were much higher than expected in the latter but reduced to nearer expected  
48  
49 levels during the project. Referrals also increased substantially in intervention but  
50  
51 then plateaued after introduction of specialist teams.  
52  
53  
54  
55  
56  
57  
58  
59  
60

1 The introduction of the access and waiting standard target brought increased funding  
2 for FEP nationally. In the pathway area the commissioners remained well engaged  
3 with the pathway outcomes and this enabled positive contract discussions. A formal  
4 cost effectiveness analysis was therefore not conducted but the reduction in patients  
5 referred as in-patients and the subsequent reduction in relapses to hospital suggest  
6 that the re-introduction of the EIP teams and the pathway may have had a positive  
7 impact on cost in the pathway area.  
8  
9  
10  
11  
12  
13  
14  
15  
16

### 17 **Study Limitations**

18 This is an observational retrospective study based on manual audit of patients'  
19 medical records. Therefore, causality cannot be assumed. We took steps to maintain  
20 data consistency by having one dedicated member of staff involved in the data audit  
21 throughout, and by performing post-hoc data checks for consistency and outliers;  
22 however, data accuracy is naturally limited by the quality of mental health care  
23 providers' original record keeping. Additionally, missing data was common, for  
24 example only 237 (33%) of participants had a HoNoS score recorded at both referral  
25 and one year later allowing us to analyse the impact of their care on this endpoint;  
26 we cannot rule out the possibility of statistical bias caused by this.  
27  
28  
29  
30  
31  
32  
33  
34  
35  
36  
37  
38  
39  
40  
41  
42  
43  
44

### 45 **Conclusion**

46 This comparison of the implementation of a quality standard based psychosis  
47 pathway with a comparator area which followed established guidelines for Early  
48 Intervention for Psychosis teams suggests that the former was more effective at  
49 improving the level of evidence-based practice offered to patients and their carers.  
50 The findings also compare with the National Clinical Audit of Psychosis<sup>15</sup>. Integrated  
51  
52  
53  
54  
55  
56  
57  
58  
59  
60

1 care pathways can offer a platform to inform gaps in services, implement good  
2  
3 clinical practice and measure the impact.  
4  
5  
6  
7  
8

### 9 **Competing interests**

10  
11  
12 The production of the pathway has been supported by the Wessex Academic Health  
13  
14 Sciences Network (AHSN) and evaluation has also been supported by the Wessex  
15  
16 Clinical Research Network (CRN). The views and opinions expressed therein are  
17  
18 those of the authors and do not necessarily reflect those of funders, NIHR, NHS or  
19  
20 the RCPsych, AHSN or CRN. The study is sponsored by Southern Health NHS  
21  
22 Foundation Trust.  
23  
24  
25  
26  
27

### 28 **Funding Statement**

29  
30 This project has been funded by the NHS England (Regional Innovation Fund  
31  
32 programme); Small grant from the Royal College of Psychiatrists General Adult  
33  
34 Psychiatry Faculty.  
35  
36  
37  
38  
39

### 40 **Study Status**

41 The study is complete.  
42  
43  
44  
45  
46  
47  
48  
49  
50  
51  
52  
53  
54  
55  
56  
57  
58  
59  
60

## Authors' contributions

SR, DK are grant holders and contributed to the concept and design of the study. SR is the CI and led the development of the study protocol and study documentation and made a significant contribution to the manuscript. All authors contributed to elaboration and refinement of the study protocol and approved the final manuscript.

## Acknowledgements

We would like to thank everyone who has been involved at any stage of this study.



## References

1. World Health Organisation. *The World Health Report 2001. Mental Health: New Understanding. New Hope.* Geneva 2005.
2. Rössler W, Salize HJ, van Os J, Riecher-Rössler A. Size of burden of schizophrenia and psychotic disorders. *Eur Neuropsychopharmacol.* 2005;15(4):399-409.
3. McGorry PD, Edwards J, Mihalopoulos C, Harrigan SM, Jackson HJ. EPPIC: an evolving system of early detection and optimal management. *Schizophr Bull.* 1996;22(2):305-326.
4. Drake RJ, Haley CJ, Akhtar S, Lewis SW. Causes and consequences of duration of untreated psychosis in schizophrenia. *Br J Psychiatry.* 2000;177:511-515.
5. McGlashan TH. Duration of untreated psychosis in first-episode schizophrenia: marker or determinant of course? *Biol Psychiatry.* 1999;46(7):899-907.
6. Marshall M, Lewis S, Lockwood A, Drake R, Jones P, Croudace T. Association between duration of untreated psychosis and outcome in cohorts of first-episode patients: a systematic review. *Arch Gen Psychiatry.* 2005;62(9):975-983.
7. NHS England. Guidance to support the introduction of access and waiting time standards for mental health services in 2015/16. In. *NHS England.* London: NHS England; 2015.
8. NHS England. Mental Health Task Force. Five year forward view. In. London: NHS England.; 2016.

- 1  
2  
3  
4  
5  
6  
7  
8  
9  
10  
11  
12  
13  
14  
15  
16  
17  
18  
19  
20  
21  
22  
23  
24  
25  
26  
27  
28  
29  
30  
31  
32  
33  
34  
35  
36  
37  
38  
39  
40  
41  
42  
43  
44  
45  
46  
47  
48  
49  
50  
51  
52  
53  
54  
55  
56  
57  
58  
59  
60
9. Campbell H, Hotchkiss R, Bradshaw N, Porteous M. Integrated care pathways. *BMJ*. 1998;316(7125):133-137.
10. National Institute of Clinical Excellence. Schizophrenia in Adults; Quality Standard. nice.org.uk/guidance/qs80. *National Institute for Health and Care Excellence: London*. 2015.
11. Rathod S, Griffiths A, Kingdon D, Tiplady B, Jones T. Pathways to recovery: A case for adoption of systematic pathways in psychosis. In. London: Jointly produced by Imperial College Health Partners and Wessex Academic Health Science Network supported by the Royal College of Psychiatrists and Rethink Mental Illness; 2015.
12. Rathod S, Garner C, Griffiths A, et al. Protocol for a multicentre study to assess feasibility, acceptability, effectiveness and direct costs of TRIumPH (Treatment and Recovery In Psychosis): integrated care pathway for psychosis. *BMJ Open*. 2016;6(12):e012751.
13. Braun V, Clarke V. Using thematic analysis in psychology. *Qualitative research in psychology*. 2006;3(2):77-101.
14. Birchwood M, Connor C, Lester H, et al. Reducing duration of untreated psychosis: care pathways to early intervention in psychosis services. *Br J Psychiatry*. 2013;203(1):58-64.
15. Royal College of Psychiatrists (2019) National Clinical Audit of Psychosis – National Report for the Early Intervention in Psychosis Spotlight Audit 2018/2019. London: Healthcare Quality Improvement Partnership.  
Available from: [www.rcpsych.ac.uk/NCAP](http://www.rcpsych.ac.uk/NCAP)

## Tables

**Table 1: Demographic information for all individuals referred to EIP service. Numbers represent either median (IQR) for continuous variables or proportions for categorical variables. Excludes EIP to EIP transfers.**

|                                         |                                                                 | Intervention arm       |                        |                        | Control Arm            |                        |                        |
|-----------------------------------------|-----------------------------------------------------------------|------------------------|------------------------|------------------------|------------------------|------------------------|------------------------|
|                                         |                                                                 | Baseline<br>(n=123)    | Year 1<br>(n=416)      | Year 2<br>(n=463)      | Baseline<br>(n=237)    | Year 1<br>(n=271)      | Year 2<br>(n=252)      |
| Age (Years)                             |                                                                 | 22.4<br>(19.3 to 28.2) | 21.4<br>(19.0 to 26.1) | 21.6<br>(19.0 to 25.9) | 19.4<br>(16.7 to 24.9) | 19.7<br>(17.1 to 24.8) | 21.8<br>(17.9 to 30.3) |
| Gender:                                 | <i>Female</i>                                                   | 35%                    | 40%                    | 39%                    | 43%                    | 40%                    | 38%                    |
|                                         | <i>Male</i>                                                     | 65%                    | 60%                    | 61%                    | 57%                    | 60%                    | 62%                    |
| Ethnicity:                              | <i>White</i>                                                    | 88%                    | 89%                    | 93%                    | 92%                    | 93%                    | 92%                    |
|                                         | <i>Black or Black British</i>                                   | 5%                     | 3%                     | 3%                     | 1%                     | 3%                     | 1%                     |
|                                         | <i>Asian or Asian British</i>                                   | 0%                     | 2%                     | 0%                     | 1%                     | 1%                     | 1%                     |
|                                         | <i>Mixed race</i>                                               | 3%                     | 3%                     | 2%                     | 3%                     | 1%                     | 4%                     |
|                                         | <i>Other</i>                                                    | 5%                     | 2%                     | 1%                     | 3%                     | 3%                     | 2%                     |
| Accommodation Status:                   |                                                                 |                        |                        |                        |                        |                        |                        |
|                                         | <i>Accommodation with MH care support</i>                       | 3%                     | 1%                     | 0%                     | 0%                     | 2%                     | 0%                     |
|                                         | <i>Accommodation with other support</i>                         | 3%                     | 4%                     | 7%                     | 4%                     | 5%                     | 2%                     |
|                                         | <i>Acute/long stay healthcare residential facility/hospital</i> | 0%                     | 0%                     | 1%                     | 3%                     | 8%                     | 13%                    |
|                                         | <i>Homeless</i>                                                 | 7%                     | 9%                     | 13%                    | 10%                    | 8%                     | 7%                     |
|                                         | <i>Mainstream housing</i>                                       | 88%                    | 86%                    | 80%                    | 79%                    | 76%                    | 76%                    |
|                                         | <i>Bail/probation hostel</i>                                    | 0%                     | 0%                     | 0%                     | 2%                     | 0%                     | 0%                     |
|                                         | <i>Other</i>                                                    | 0%                     | 0%                     | 0%                     | 2%                     | 1%                     | 3%                     |
| Employment status:                      |                                                                 |                        |                        |                        |                        |                        |                        |
|                                         | <i>Employed</i>                                                 | 38%                    | 20%                    | 29%                    | 24%                    | 26%                    | 20%                    |
|                                         | <i>Unemployed</i>                                               | 26%                    | 38%                    | 40%                    | 48%                    | 40%                    | 54%                    |
|                                         | <i>Homemaker</i>                                                | 1%                     | 2%                     | 1%                     | 4%                     | 3%                     | 1%                     |
|                                         | <i>Student</i>                                                  | 16%                    | 15%                    | 14%                    | 11%                    | 12%                    | 11%                    |
|                                         | <i>Long term sickness/disability benefit</i>                    | 15%                    | 16%                    | 12%                    | 9%                     | 5%                     | 5%                     |
|                                         | <i>Statutory sick pay</i>                                       | 0%                     | 3%                     | 0%                     | 5%                     | 9%                     | 3%                     |
|                                         | <i>Retired</i>                                                  | 0%                     | 0%                     | 0%                     | 0%                     | 0%                     | 1%                     |
|                                         | <i>Other</i>                                                    | 3%                     | 6%                     | 4%                     | 0%                     | 4%                     | 4%                     |
| Change in employment status during EIP: |                                                                 |                        |                        |                        |                        |                        |                        |
|                                         | <i>No reported change</i>                                       | 58 (84%)               | 107 (91%)              | 124 (100%)             | 128 (88%)              | 163 (97%)              | 88 (86%)               |
|                                         | <i>Became employed</i>                                          | 0 (0%)                 | 4 (3%)                 | 0 (0%)                 | 13 (9%)                | 2 (1%)                 | 5 (5%)                 |
|                                         | <i>Left employment/became unemployed</i>                        | 10 (14%)               | 4 (3%)                 | 0 (0%)                 | 4 (3%)                 | 2 (1%)                 | 3 (3%)                 |
|                                         | <i>Other</i>                                                    | 1 (1%)                 | 3 (3%)                 | 0 (0%)                 | 0 (0%)                 | 1 (1%)                 | 6 (6%)                 |
| Referral source:                        |                                                                 |                        |                        |                        |                        |                        |                        |
|                                         | <i>Primary care</i>                                             | 75 (62%)               | 256 (63%)              | 283 (62%)              | 143 (60%)              | 172 (63%)              | 139 (55%)              |
|                                         | <i>Community mental health service</i>                          | 19 (16%)               | 66 (16%)               | 104 (23%)              | 14 (6%)                | 26 (10%)               | 14 (6%)                |
|                                         | <i>Inpatient mental health service</i>                          | 1 (1%)                 | 21 (5%)                | 15 (3%)                | 12 (5%)                | 16 (6%)                | 4 (2%)                 |
|                                         | <i>A&amp;E department</i>                                       | 11 (9%)                | 20 (5%)                | 21 (5%)                | 5 (2%)                 | 13 (5%)                | 23 (9%)                |
|                                         | <i>Physical healthcare service</i>                              | 0 (0%)                 | 13 (3%)                | 8 (2%)                 | 4 (2%)                 | 8 (3%)                 | 2 (1%)                 |
|                                         | <i>Caring and social services</i>                               | 0 (0%)                 | 0 (0%)                 | 5 (1%)                 | 10 (4%)                | 5 (2%)                 | 11 (4%)                |
|                                         | <i>Education service</i>                                        | 0 (0%)                 | 6 (1%)                 | 4 (1%)                 | 12 (5%)                | 7 (3%)                 | 8 (3%)                 |
|                                         | <i>Police/prison/probation</i>                                  | 9 (7%)                 | 8 (2%)                 | 11 (2%)                | 14 (6%)                | 11 (4%)                | 25 (10%)               |
|                                         | <i>Self-referral</i>                                            | 1 (1%)                 | 2 (0%)                 | 2 (0%)                 | 12 (5%)                | 6 (2%)                 | 17 (7%)                |
|                                         | <i>Other</i>                                                    | 5 (4%)                 | 16 (4%)                | 4 (1%)                 | 11 (5%)                | 8 (3%)                 | 9 (4%)                 |
| Central triage point (CTP):             |                                                                 |                        |                        |                        |                        |                        |                        |
|                                         | <i>EIP</i>                                                      | 22 (18%)               | 107 (26%)              | 120 (26%)              | 33 (14%)               | 24 (9%)                | 27 (11%)               |
|                                         | <i>Community mental health service</i>                          | 98 (80%)               | 281 (69%)              | 325 (71%)              | 183 (78%)              | 217 (81%)              | 184 (73%)              |
|                                         | <i>Inpatient mental health service</i>                          | 2 (2%)                 | 21 (5%)                | 14 (3%)                | 17 (7%)                | 26 (10%)               | 27 (11%)               |
|                                         | <i>Physical healthcare service</i>                              | 0 (0%)                 | 1 (0%)                 | 0 (0%)                 | 0 (0%)                 | 0 (0%)                 | 0 (0%)                 |
|                                         | <i>Police/prison/probation</i>                                  | 0 (0%)                 | 0 (0%)                 | 0 (0%)                 | 3 (1%)                 | 2 (1%)                 | 14 (6%)                |

1  
2  
3  
4  
5  
6  
7  
8  
9  
10  
11  
12  
13  
14  
15  
16  
17  
18  
19  
20  
21  
22  
23  
24  
25  
26  
27  
28  
29  
30  
31  
32  
33  
34  
35  
36  
37  
38  
39  
40  
41  
42  
43  
44  
45  
46  
47  
48  
49  
50  
51  
52  
53  
54  
55  
56  
57  
58  
59  
60

For peer review only

**Table 2: Process outcomes for all individuals referred to EIP service. Numbers represent either N (%) for categorical variables or median (IQR) for continuous variables. Excludes EIP to EIP transfers. P values for categorical comparisons from chi-squared test or Fisher's exact test as appropriate. P values for continuous data from Mann-Whitney U tests.**

|                                                                  | Intervention arm       |                       |                       |                                             |                                             | Control arm             |                        |                        |                                             |                                             |
|------------------------------------------------------------------|------------------------|-----------------------|-----------------------|---------------------------------------------|---------------------------------------------|-------------------------|------------------------|------------------------|---------------------------------------------|---------------------------------------------|
|                                                                  | Baseline<br>(n=123)    | Year One<br>(n=416)   | Year Two<br>(n=463)   | P value<br>Y1 vs baseline<br>Y2 vs baseline | P value<br>Y1 vs baseline<br>Y2 vs baseline | Baseline<br>(n=237)     | Year One<br>(n=271)    | Year Two<br>(n=252)    | P value<br>Y1 vs baseline<br>Y2 vs baseline | P value<br>Y1 vs baseline<br>Y2 vs baseline |
| Accepted onto EIP pathway                                        | 69 (56%)               | 118 (28%)             | 124 (27%)             | < 0.0001                                    | < 0.0001                                    | 145 (61%)               | 168 (62%)              | 102 (40%)              | 0.89                                        | < 0.0001                                    |
| Time from EIP referral to EIP assessment (in days)               | 11.0<br>(6.0 to 20.5)  | 6.0<br>(3.0 to 12.0)  | 7.0<br>(4.0 to 14.0)  | < 0.0001                                    | < 0.0001                                    | 7.0<br>(3.0 to 12.0)    | 7.0<br>(4.0 to 12.8)   | 12.0<br>(7.0 to 21.0)  | 0.24                                        | < 0.0001                                    |
| Time from CTP referral to EIP assessment (in days)               | 20.0<br>(11.8 to 55.3) | 15.0<br>(6.0 to 40.0) | 11.0<br>(6.0 to 23.0) | 0.0053                                      | < 0.0001                                    | 33.0<br>(11.0 to 142.5) | 24.0<br>(9.3 to 130.5) | 33.0<br>(13.0 to 98.0) | 0.45                                        | 0.96                                        |
| DNAs prior to assessment                                         |                        |                       |                       |                                             |                                             |                         |                        |                        |                                             |                                             |
| 0                                                                | 113 (92%)              | 378 (91%)             | 434 (94%)             |                                             | 0.37                                        | 211 (89%)               | 247 (91%)              | 232 (92%)              |                                             | 0.59                                        |
| 1                                                                | 7 (6%)                 | 28 (7%)               | 17 (4%)               |                                             |                                             | 17 (7%)                 | 19 (7%)                | 12 (5%)                |                                             |                                             |
| 2 or more                                                        | 3 (2%)                 | 10 (2%)               | 12 (3%)               |                                             |                                             | 9 (4%)                  | 6 (2%)                 | 9 (4%)                 |                                             |                                             |
| Time to allocation and engagement by care coordinator (in weeks) | 4.0<br>(0.0 to 11.0)   | 1.0<br>(0.0 to 5.0)   | 0.0<br>(0.0 to 3.0)   | 0.0033                                      | < 0.0001                                    | 0.0<br>(0.0 to 7.3)     | 0.0<br>(0.0 to 7.0)    | 0.0<br>(0.0 to 14.8)   | 0.054                                       | 0.48                                        |
| Time to multidisciplinary team (MDT) discussion (in weeks)       | 6.2<br>(1.7 to 20.0)   | 1.9<br>(1.0 to 4.6)   | 1.9<br>(0.9 to 3.0)   | < 0.0001                                    | < 0.0001                                    | 1.8<br>(0.7 to 3.0)     | 1.7<br>(1.0 to 2.7)    | 4.9<br>(1.8 to 28.0)   | 0.74                                        | < 0.0001                                    |
| Time to medical formulation (in weeks)                           | 4.7<br>(2.3 to 8.4)    | 3.9<br>(1.9 to 8.4)   | 3.3<br>(1.9 to 6.0)   | 0.45                                        | 0.11                                        | 6.5<br>(2.3 to 10.3)    | 6.7<br>(2.4 to 11.0)   | 8.3<br>(3.8 to 11.9)   | 0.99                                        | 0.14                                        |
| Time to CPA (care plan approach) / care plan (in weeks)          | 2.4<br>(0.0 to 6.9)    | 2.7<br>(0.8 to 5.4)   | 2.0<br>(0.4 to 5.8)   | 0.62                                        | 0.87                                        | 2.0<br>(0.7 to 5.6)     | 3.0<br>(1.0 to 14.5)   | 13.0<br>(4.3 to 34.0)  | 0.080                                       | < 0.0001                                    |
| Time to risk assessment completion (in weeks)                    | 50.3<br>(2.6 to 91.1)  | 6.4<br>(1.0 to 15.3)  | 4.7<br>(1.4 to 8.1)   | < 0.0001                                    | < 0.0001                                    | 5.3<br>(1.4 to 15.0)    | 3.6<br>(1.0 to 15.1)   | 4.6<br>(1.1 to 13.4)   | 0.38                                        | 0.60                                        |
| Reason for non-acceptance to EIP:                                |                        |                       |                       |                                             |                                             |                         |                        |                        |                                             |                                             |
| Does not fulfil EIP criteria                                     | 29 (71%)               | 202 (79%)             | 280 (85%)             |                                             | 0.0010                                      | 18 (20%)                | 20 (19%)               | 28 (19%)               |                                             | 0.76                                        |
| Discharged on professional advice                                | 4 (10%)                | 14 (5%)               | 2 (1%)                |                                             |                                             | 62 (67%)                | 65 (63%)               | 100 (66%)              |                                             |                                             |
| DNA/did not engage/declined treatment                            | 6 (15%)                | 27 (11%)              | 35 (11%)              |                                             |                                             | 5 (5%)                  | 8 (8%)                 | 13 (9%)                |                                             |                                             |
| Moved out of area                                                | 0 (0%)                 | 11 (4%)               | 10 (3%)               |                                             |                                             | 6 (7%)                  | 7 (7%)                 | 9 (6%)                 |                                             |                                             |

|                                                                       | Intervention arm |            |            |                |                | Control arm |           |          |                |                |
|-----------------------------------------------------------------------|------------------|------------|------------|----------------|----------------|-------------|-----------|----------|----------------|----------------|
|                                                                       | Baseline         | Year One   | Year Two   | P value        | P value        | Baseline    | Year One  | Year Two | P value        | P value        |
|                                                                       | (n=123)          | (n=416)    | (n=463)    | Y1 vs baseline | Y2 vs baseline | (n=237)     | (n=271)   | (n=252)  | Y1 vs baseline | Y2 vs baseline |
| <i>Other</i>                                                          | 2 (5%)           | 3 (1%)     | 4 (1%)     |                |                | 1 (1%)      | 4 (4%)    | 1 (1%)   |                |                |
| Reason for discharge from EIP after acceptance:                       |                  |            |            |                |                |             |           |          |                |                |
| <i>Care completed</i>                                                 | 4 (15%)          | 4 (9%)     | 0 (0%)     | 0.076          |                | 0 (0%)      | 0 (0%)    | 0 (0%)   |                | 0.40           |
| <i>Does not fulfil EIP criteria</i>                                   | 8 (31%)          | 22 (48%)   | 22 (50%)   |                |                | 7 (6%)      | 6 (5%)    | 4 (9%)   |                |                |
| <i>Discharged on professional advice</i>                              | 0 (0%)           | 1 (2%)     | 3 (7%)     |                |                | 80 (72%)    | 72 (61%)  | 25 (54%) |                |                |
| <i>DNA/did not engage/declined treatment</i>                          | 6 (23%)          | 8 (17%)    | 8 (18%)    |                |                | 16 (14%)    | 25 (21%)  | 11 (24%) |                |                |
| <i>Moved out of area</i>                                              | 5 (19%)          | 11 (24%)   | 9 (20%)    |                |                | 7 (6%)      | 12 (10%)  | 5 (11%)  |                |                |
| <i>Other</i>                                                          | 3 (12%)          | 0 (0%)     | 2 (5%)     |                |                | 1 (1%)      | 4 (3%)    | 1 (2%)   |                |                |
| Change in accommodation status during EIP:                            |                  |            |            |                |                |             |           |          |                |                |
| <i>No reported change</i>                                             | 63 (91%)         | 118 (100%) | 124 (100%) | <0.0001        |                | 136 (94%)   | 157 (93%) | 78 (76%) |                | <0.0001        |
| <i>Moved to mainstream housing</i>                                    | 0 (0%)           | 0 (0%)     | 0 (0%)     |                |                | 2 (1%)      | 3 (2%)    | 10 (10%) |                |                |
| <i>Moved from acute/long stay/hospital to supported accommodation</i> | 0 (0%)           | 0 (0%)     | 0 (0%)     |                |                | 1 (1%)      | 3 (2%)    | 2 (2%)   |                |                |
| <i>Moved to acute/long stay/hospital</i>                              | 1 (1%)           | 0 (0%)     | 0 (0%)     |                |                | 0 (0%)      | 1 (1%)    | 4 (4%)   |                |                |
| <i>Committed to bail/probation hostel/prison</i>                      | 0 (0%)           | 0 (0%)     | 0 (0%)     |                |                | 0 (0%)      | 0 (0%)    | 1 (1%)   |                |                |
| <i>No longer homeless</i>                                             | 1 (1%)           | 0 (0%)     | 0 (0%)     |                |                | 3 (2%)      | 2 (1%)    | 1 (1%)   |                |                |
| <i>Became homeless</i>                                                | 1 (1%)           | 0 (0%)     | 0 (0%)     |                |                | 1 (1%)      | 2 (1%)    | 1 (1%)   |                |                |
| <i>Other</i>                                                          | 3 (4%)           | 0 (0%)     | 0 (0%)     |                |                | 2 (1%)      | 0 (0%)    | 5 (5%)   |                |                |

**Table 3: Physical health assessments and interventions. N (%) individuals accepted onto the EIP pathway at each site who received listed physical health checks within 12 weeks, were offered interventions or took up interventions within 6 months of EIP referral. Excludes EIP to EIP transfers. P values from chi-squared test or Fisher's exact test as appropriate.**

|                                                       | Intervention arm   |                     |                     |         | Control Arm         |                     |                     |         |
|-------------------------------------------------------|--------------------|---------------------|---------------------|---------|---------------------|---------------------|---------------------|---------|
|                                                       | Baseline<br>(n=69) | Year One<br>(n=118) | Year Two<br>(n=124) | P value | Baseline<br>(n=145) | Year One<br>(n=168) | Year Two<br>(n=102) | P value |
| Physical health assessments received within 12 weeks: |                    |                     |                     |         |                     |                     |                     |         |
| <i>Physical Health (general)</i>                      | 33 (48%)           | 81 (69%)            | 86 (69%)            | 0.0038  | 38 (26%)            | 40 (24%)            | 44 (43%)            | 0.0019  |
| <i>Smoking</i>                                        | 23 (33%)           | 72 (61%)            | 76 (61%)            | 0.00033 | 38 (26%)            | 42 (25%)            | 34 (33%)            | 0.30    |
| <i>Substance Use</i>                                  | 35 (51%)           | 93 (79%)            | 98 (79%)            | <0.0001 | 71 (49%)            | 63 (38%)            | 66 (65%)            | <0.0001 |
| <i>Alcohol</i>                                        | 35 (51%)           | 89 (75%)            | 102 (82%)           | <0.0001 | 60 (41%)            | 60 (36%)            | 61 (60%)            | 0.00045 |
| <i>Weight</i>                                         | 17 (25%)           | 46 (39%)            | 60 (48%)            | 0.0065  | 46 (32%)            | 39 (23%)            | 39 (38%)            | 0.027   |
| <i>Waist</i>                                          | 4 (6%)             | 16 (14%)            | 27 (22%)            | 0.011   | 18 (12%)            | 9 (5%)              | 2 (2%)              | 0.0037  |
| <i>Pulse</i>                                          | 20 (29%)           | 48 (41%)            | 47 (38%)            | 0.30    | 25 (17%)            | 32 (19%)            | 33 (32%)            | 0.010   |
| <i>Blood Pressure</i>                                 | 22 (32%)           | 50 (42%)            | 55 (44%)            | 0.25    | 32 (22%)            | 38 (23%)            | 40 (39%)            | 0.0036  |
| <i>Bloods Taken</i>                                   | 18 (26%)           | 58 (49%)            | 50 (40%)            | 0.010   | 15 (10%)            | 25 (15%)            | 36 (35%)            | <0.0001 |
| <i>ECG</i>                                            | 10 (14%)           | 49 (42%)            | 27 (22%)            | <0.0001 | 17 (12%)            | 10 (6%)             | 30 (29%)            | <0.0001 |
| <i>NICE health check in 12 weeks</i>                  | 2 (3%)             | 9 (8%)              | 11 (9%)             | 0.30    | 1 (1%)              | 1 (1%)              | 1 (1%)              | 0.94    |
| Interventions offered at any time:                    |                    |                     |                     |         |                     |                     |                     |         |
| <i>Cognitive behaviour therapy</i>                    | 43 (62%)           | 68 (58%)            | 84 (68%)            | 0.26    | 1 (1%)              | 23 (14%)            | 22 (22%)            | <0.0001 |
| <i>Family intervention</i>                            | 36 (52%)           | 64 (54%)            | 80 (65%)            | 0.17    | 7 (5%)              | 7 (4%)              | 10 (10%)            | 0.13    |
| <i>Carer support</i>                                  | 50 (72%)           | 82 (69%)            | 90 (73%)            | 0.86    | 34 (23%)            | 29 (17%)            | 25 (25%)            | 0.26    |
| <i>Employment support</i>                             | 41 (59%)           | 47 (40%)            | 57 (46%)            | 0.043   | 37 (26%)            | 47 (28%)            | 18 (18%)            | 0.15    |
| Interventions taken up within 6 months:               |                    |                     |                     |         |                     |                     |                     |         |
| <i>Engagement</i>                                     | 52 (75%)           | 103 (87%)           | 111 (90%)           | 0.039   | 82 (57%)            | 74 (44%)            | 80 (79%)            | <0.0001 |
| <i>CBT for psychosis</i>                              | 3 (4%)             | 10 (8%)             | 8 (6%)              | 0.56    | 0 (0%)              | 7 (4%)              | 7 (7%)              | 0.010   |
| <i>Carer support</i>                                  | 24 (35%)           | 63 (53%)            | 84 (68%)            | <0.0001 | 17 (12%)            | 22 (13%)            | 16 (16%)            | 0.66    |
| <i>Medication</i>                                     | 37 (54%)           | 80 (68%)            | 91 (73%)            | 0.027   | 25 (17%)            | 37 (22%)            | 28 (28%)            | 0.16    |
| <i>Collaborative care planning</i>                    | 22 (32%)           | 85 (72%)            | 86 (69%)            | <0.0001 | 45 (31%)            | 38 (23%)            | 1 (1%)              | <0.0001 |
| <i>Physical Health</i>                                | 2 (3%)             | 4 (3%)              | 7 (6%)              | 0.58    | 37 (26%)            | 9 (5%)              | 15 (15%)            | <0.0001 |
| <i>Vocational</i>                                     | 14 (20%)           | 79 (67%)            | 89 (72%)            | <0.0001 | 29 (20%)            | 37 (22%)            | 39 (39%)            | 0.0023  |
| <i>Family work for psychosis</i>                      | 2 (3%)             | 11 (9%)             | 8 (6%)              | 0.25    | 2 (1%)              | 6 (4%)              | 1 (1%)              | 0.26    |
| <i>Any of these</i>                                   | 57 (83%)           | 113 (96%)           | 117 (94%)           | 0.0071  | 83 (57%)            | 74 (44%)            | 82 (81%)            | <0.0001 |

**Table 4: Acute care & clinical outcomes. Proportion of individuals accepted onto the EIP pathway at each trust experiencing acute care outcomes [n (%)] within 1 year of trust referral, and time to reach those outcomes where applicable [median (IQR)]. Excludes EIP to EIP transfers. P values for categorical comparisons from chi-squared test or Fisher's exact test as appropriate. P values for continuous data from Mann-Whitney U tests.**

|                                                                   | Intervention arm    |                     |                    |                |                | Control arm         |                     |                    |                |                |
|-------------------------------------------------------------------|---------------------|---------------------|--------------------|----------------|----------------|---------------------|---------------------|--------------------|----------------|----------------|
|                                                                   | Baseline            | Year One            | Year Two           | P value        | P value        | Baseline            | Year One            | Year Two           | P value        | P value        |
|                                                                   | (n=69)              | (n=118)             | (n=124)            | Y1 vs baseline | Y2 vs baseline | (n=145)             | (n=168)             | (n=102)            | Y1 vs baseline | Y2 vs baseline |
| Acute MH admission within 1 year of EIP referral                  | 27 (39%)            | 47 (40%)            | 36 (29%)           |                | 0.16           | 16 (11%)            | 21 (13%)            | 19 (19%)           |                | 0.20           |
| Time to acute admission (where applicable) (weeks)                | 0.0 (0.0 to 10.0)   | 1.0 (0.0 to 7.0)    | 0.0 (0.0 to 3.5)   | 0.88           | 0.11           | 15.0 (3.0 to 41.0)  | 11.0 (2.0 to 41.0)  | 13.5 (3.0 to 34.0) | 0.82           | 0.92           |
| Time to acute MH/inpatient screening (hours)                      |                     |                     |                    |                |                |                     |                     |                    |                |                |
| 0 - 4                                                             | 21 (91%)            | 1 (100%)            | 14 (67%)           |                | -              | 11 (73%)            | 11 (58%)            | 8 (53%)            |                | 0.49           |
| 4 - 6                                                             | 0 (0%)              | 0 (0%)              | 6 (29%)            |                |                | 3 (20%)             | 4 (21%)             | 3 (20%)            |                |                |
| 6 - 8                                                             | 1 (4%)              | 0 (0%)              | 0 (0%)             |                |                | 0 (0%)              | 2 (11%)             | 1 (7%)             |                |                |
| 8 - 10                                                            | 1 (4%)              | 0 (0%)              | 1 (5%)             |                |                | 1 (7%)              | 2 (11%)             | 3 (20%)            |                |                |
| Time from acute admission to discharge (where applicable) (weeks) | 4.5 (2.0 to 10.3)   | 4.0 (2.0 to 6.8)    | 3.0 (1.0 to 5.3)   | 0.42           | 0.56           | 3.0 (2.0 to 13.5)   | 3.0 (2.0 to 5.0)    | 3.0 (2.3 to 3.8)   | 0.56           | 0.95           |
| Number of subsequent acute admissions                             |                     |                     |                    |                |                |                     |                     |                    |                |                |
| None                                                              | 18 (64%)            | 41 (85%)            | 25 (71%)           |                | 0.091          | 14 (67%)            | 15 (65%)            | 13 (62%)           |                | 0.95           |
| 1                                                                 | 6 (21%)             | 4 (8%)              | 9 (26%)            |                |                | 5 (24%)             | 2 (9%)              | 8 (38%)            |                |                |
| More than 1                                                       | 4 (14%)             | 3 (6%)              | 1 (3%)             |                |                | 2 (10%)             | 6 (26%)             | 0 (0%)             |                |                |
| MHA section within 1 year of EIP referral                         | 25 (36%)            | 39 (33%)            | 34 (27%)           |                | 0.58           | 16 (11%)            | 21 (13%)            | 18 (18%)           |                | 0.18           |
| Contact acute MH services (post EIP)                              | 32 (46%)            | 41 (35%)            | 37 (30%)           |                | < 0.0001       | 25 (17%)            | 30 (18%)            | 22 (22%)           |                | < 0.0001       |
| Crisis plan completed                                             | 35 (51%)            | 59 (50%)            | 44 (35%)           |                | 0.032          | 71 (49%)            | 69 (41%)            | 68 (67%)           |                | 0.00023        |
| Time to crisis plan completed (weeks)                             | 50.0 (15.0 to 79.0) | 22.5 (10.0 to 37.8) | 12.5 (6.0 to 22.8) | 0.0010         | < 0.0001       | 8.0 (1.0 to 23.0)   | 11.0 (1.0 to 39.0)  | 12.0 (2.0 to 34.3) | 0.36           | 0.10           |
| A&E attendance within 1 year of EIP referral                      | 7 (10%)             | 10 (8%)             | 11 (9%)            |                | 0.91           | 11 (8%)             | 12 (7%)             | 10 (10%)           |                | 0.72           |
| Time to A&E attendance (weeks)                                    | 21.0 (2.5 to 68.3)  | 8.5 (0.0 to 17.0)   | 13.0 (8.0 to 43.0) | 0.15           | 0.88           | 30.0 (25.0 to 41.0) | 44.0 (11.0 to 76.0) | 14.5 (7.3 to 31.5) | 0.87           | 0.11           |
| Reason for A&E attendance:                                        |                     |                     |                    |                |                |                     |                     |                    |                |                |



1  
2  
3  
4  
5  
6  
7  
8  
9  
10  
11  
12  
13  
14  
15  
16  
17  
18  
19  
20  
21  
22  
23  
24  
25  
26  
27  
28  
29  
30  
31  
32  
33  
34  
35  
36  
37  
38  
39  
40  
41  
42  
43  
44  
45  
46

|                                                                   | Intervention arm   |                     |                     |                           |                           | Control arm         |                     |                     |                           |                           |
|-------------------------------------------------------------------|--------------------|---------------------|---------------------|---------------------------|---------------------------|---------------------|---------------------|---------------------|---------------------------|---------------------------|
|                                                                   | Baseline<br>(n=69) | Year One<br>(n=118) | Year Two<br>(n=124) | P value<br>Y1 vs baseline | P value<br>Y2 vs baseline | Baseline<br>(n=145) | Year One<br>(n=168) | Year Two<br>(n=102) | P value<br>Y1 vs baseline | P value<br>Y2 vs baseline |
| <i>Deterioration in mental state</i>                              | 7 (41%)            | 7 (50%)             | 5 (42%)             | -                         | -                         | 2 (15%)             | 4 (24%)             | 2 (20%)             | -                         | -                         |
| <i>Selfharm/suicidal ideation/suicide attempt/overdose</i>        | 6 (35%)            | 5 (36%)             | 4 (33%)             |                           |                           | 10 (77%)            | 6 (35%)             | 4 (40%)             |                           |                           |
| <i>Alcohol/substance abuse</i>                                    | 1 (6%)             | 1 (7%)              | 2 (17%)             |                           |                           | 0 (0%)              | 1 (6%)              | 0 (0%)              |                           |                           |
| <i>Medication side effects</i>                                    | 0 (0%)             | 0 (0%)              | 0 (0%)              |                           |                           | 0 (0%)              | 1 (6%)              | 1 (10%)             |                           |                           |
| <i>Physical injury/illness (not apparently psychosis related)</i> | 3 (18%)            | 1 (7%)              | 1 (8%)              |                           |                           | 1 (8%)              | 5 (29%)             | 3 (30%)             |                           |                           |
| General hospital admission within 1 year of EIP referral          | 1 (1%)             | 4 (3%)              | 3 (2%)              | -                         | -                         | 2 (1%)              | 0 (0%)              | 4 (4%)              | -                         | -                         |
| Contact with criminal justice system whilst in EIP pathway        | 15 (22%)           | 34 (29%)            | 4 (3%)              | < 0.0001                  | < 0.0001                  | 20 (14%)            | 20 (12%)            | 21 (21%)            | < 0.0001                  | < 0.0001                  |
| Criminal conviction within 1 year of EIP referral                 | 1 (1%)             | 0 (0%)              | 0 (0%)              | -                         | -                         | 4 (3%)              | 4 (2%)              | 1 (1%)              | -                         | -                         |
| Deaths within 1 year of EIP referral                              | 0 (0%)             | 0 (0%)              | 0 (0%)              | -                         | -                         | 0 (0%)              | 0 (0%)              | 1 (1%)              | -                         | -                         |

**Table 5: Clinical outcomes (HoNoS). Mean (SD) change in HoNoS scores from referral to one year at each trust for patients accepted onto EIP pathway. Excludes EIP to EIP transfers. P values from paired t-tests.**

|                                                                    | Intervention Arm   |                    |                       |                           |                           | Control Arm        |                       |                       |                           |                           |
|--------------------------------------------------------------------|--------------------|--------------------|-----------------------|---------------------------|---------------------------|--------------------|-----------------------|-----------------------|---------------------------|---------------------------|
|                                                                    | Baseline<br>(n=52) | Year One<br>(n=77) | Year<br>Two<br>(n=53) | P value<br>Y1 vs baseline | P value<br>Y2 vs baseline | Baseline<br>(n=28) | Year<br>One<br>(n=16) | Year<br>Two<br>(n=11) | P value<br>Y1 vs baseline | P value<br>Y2 vs baseline |
| Change in HoNoS scores (from referral to 1 year)                   |                    |                    |                       |                           |                           |                    |                       |                       |                           |                           |
| 1. <i>Overactive, aggressive, disruptive or agitated behaviour</i> | -0.56<br>(1.73)    | -0.43<br>(1.72)    | -0.69<br>(1.45)       | 0.59                      | 0.78                      | -0.43<br>(1.55)    | -1.06<br>(1.65)       | -0.09<br>(1.14)       | 0.21                      | 0.52                      |
| 2. <i>Non-accidental self injury</i>                               | -0.50<br>(1.38)    | -0.22<br>(1.26)    | -0.22<br>(1.15)       | 0.18                      | 0.21                      | -0.25<br>(0.84)    | -0.06<br>(1.29)       | -0.36<br>(1.43)       | 0.56                      | 0.76                      |
| 3. <i>Problem drinking or drug taking</i>                          | -0.40<br>(1.48)    | -0.15<br>(1.87)    | 0.04<br>(1.71)        | 0.30                      | 0.12                      | 0.14<br>(1.04)     | -0.31<br>(1.20)       | -0.10<br>(1.52)       | 0.19                      | 0.58                      |
| 4. <i>Cognitive problems</i>                                       | -0.27<br>(1.34)    | -0.15<br>(1.32)    | -0.06<br>(1.32)       | 0.48                      | 0.33                      | -0.29<br>(1.18)    | -0.38<br>(0.96)       | -0.50<br>(1.51)       | 0.80                      | 0.65                      |
| 5. <i>Physical illness or disability problems</i>                  | -0.23<br>(1.10)    | 0.03<br>(1.35)     | 0.02<br>(1.08)        | 0.19                      | 0.17                      | 0.11<br>(0.50)     | -0.38<br>(1.02)       | 0.45<br>(1.44)        | 0.041                     | 0.26                      |
| 6. <i>Problems associated with hallucinations and delusions</i>    | -0.56<br>(1.62)    | -0.71<br>(1.70)    | -0.11<br>(1.51)       | 0.74                      | 0.14                      | -0.86<br>(1.46)    | -1.81<br>(1.42)       | -0.91<br>(1.76)       | 0.041                     | 0.93                      |
| 7. <i>Problems with depressed mood</i>                             | -0.50<br>(1.59)    | -0.19<br>(1.49)    | -0.55<br>(1.12)       | 0.24                      | 0.94                      | -0.46<br>(1.29)    | -0.88<br>(1.41)       | -0.55<br>(1.21)       | 0.33                      | 0.86                      |
| 8. <i>Other mental and behavioural problems</i>                    | -0.45<br>(1.53)    | -0.73<br>(1.81)    | -0.27<br>(1.49)       | 0.58                      | 0.68                      | -0.61<br>(1.26)    | -0.75<br>(1.98)       | -0.36<br>(1.69)       | 0.77                      | 0.62                      |
| 9. <i>Problems with relationships</i>                              | -0.83<br>(1.32)    | -0.41<br>(1.51)    | -0.20<br>(1.25)       | 0.07                      | 0.013                     | -0.21<br>(1.26)    | -1.00<br>(1.41)       | -0.10<br>(0.57)       | 0.064                     | 0.78                      |
| 10. <i>Problems with activities of daily living</i>                | -0.33<br>(1.57)    | -0.32<br>(1.55)    | -0.46<br>(1.47)       | 0.85                      | 0.68                      | -0.64<br>(1.16)    | -1.00<br>(1.55)       | 0.18<br>(0.75)        | 0.39                      | 0.04                      |
| 11. <i>Problems with living conditions</i>                         | -0.20<br>(1.51)    | -0.33<br>(1.44)    | 0.08<br>(1.21)        | 0.69                      | 0.28                      | -0.36<br>(1.31)    | -0.69<br>(1.20)       | 0.45<br>(1.13)        | 0.41                      | 0.079                     |
| 12. <i>Problems with occupation and activities</i>                 | -0.33<br>(1.64)    | -0.19<br>(1.47)    | 0.30<br>(1.45)        | 0.54                      | 0.037                     | -0.25<br>(1.58)    | -1.06<br>(1.57)       | -0.09<br>(1.45)       | 0.11                      | 0.77                      |

***TRIumPH: Treatment and Recovery In PsychHosis***

---

1  
2  
3  
4  
5  
6  
7  
8  
9  
10  
11  
12  
13  
14  
15  
16  
17  
18  
19  
20  
21  
22  
23  
24  
25  
26  
27  
28  
29  
30  
31  
32  
33  
34  
35  
36  
37  
38  
39  
40  
41  
42  
43  
44  
45  
46  
47  
48  
49  
50  
51  
52  
53  
54  
55  
56  
57  
58  
59  
60

For peer review only

**Table 6: Staff survey results**  
Section A: Demographics

|                                   | Intervention arm    |                   |                   | Control arm         |                   |                   |
|-----------------------------------|---------------------|-------------------|-------------------|---------------------|-------------------|-------------------|
|                                   | Baseline<br>(n=438) | Year 1<br>(n=412) | Year 2<br>(n=418) | Baseline<br>(n=122) | Year 1<br>(n=155) | Year 2<br>(n=135) |
| Type of team                      |                     |                   |                   |                     |                   |                   |
| CMHT                              | 39%                 | 32%               | 30%               | 51%                 | 46%               | 49%               |
| EIP                               | 7%                  | 10%               | 8%                | 7%                  | 5%                | 9%                |
| Psychology                        | 5%                  | 6%                | 8%                | 2%                  | 1%                | 2%                |
| Inpatient                         | 35%                 | 42%               | 42%               | 30%                 | 35%               | 27%               |
| Hospital at home                  | 8%                  | 6%                | 8%                | 4%                  | 8%                | 7%                |
| Other (inc. AAT/AOT)              | 13%                 | 7%                | 8%                | 10%                 | 8%                | 9%                |
| Job role                          |                     |                   |                   |                     |                   |                   |
| Psychiatrist/SpR/SHO              | 15%                 | 7%                | 10%               | 5%                  | 6%                | 10%               |
| Psychologist/Psychotherapist      | 7%                  | 6%                | 8%                | 6%                  | 1%                | 2%                |
| Nurse practitioner                | 42%                 | 41%               | 39%               | 39%                 | 43%               | 34%               |
| Occupational therapist            | 4%                  | 6%                | 5%                | 7%                  | 8%                | 7%                |
| Social worker                     | 7%                  | 5%                | 5%                | 8%                  | 5%                | 8%                |
| Mental health care support worker | 19%                 | 25%               | 23%               | 20%                 | 22%               | 16%               |
| Other                             | 8%                  | 10%               | 10%               | 16%                 | 15%               | 22%               |
| Geographical area of living       |                     |                   |                   |                     |                   |                   |
| North Hampshire                   | 7%                  | 6%                | 11%               | 22%                 | 35%               | 24%               |
| West Hampshire                    | 24%                 | 23%               | 18%               | 20%                 | 11%               | 27%               |
| East Hampshire                    | 32%                 | 23%               | 21%               | 48%                 | 54%               | 47%               |
| Southampton                       | 36%                 | 43%               | 50%               | 8%                  | 0%                | 1%                |
| Unknown/other                     | 1%                  | 5%                | 0%                | 2%                  | 0%                | 0%                |
| Gender                            |                     |                   |                   |                     |                   |                   |
| Male                              | 32%                 | 33%               | 32%               | 31%                 | 39%               | 36%               |
| Female                            | 67%                 | 66%               | 67%               | 68%                 | 61%               | 64%               |
| Other                             | 0%                  | 0%                | <1%               | 0%                  | 0%                | 0%                |
| Not answered                      | 1%                  | 2%                | 1%                | 1%                  | 0%                | 0%                |
| Age group                         |                     |                   |                   |                     |                   |                   |
| Under 24                          | 5%                  | 5%                | 6%                | 6%                  | 5%                | 3%                |
| 25-34                             | 26%                 | 23%               | 25%               | 17%                 | 21%               | 24%               |
| 35-44                             | 30%                 | 28%               | 30%               | 29%                 | 21%               | 25%               |
| 45-54                             | 28%                 | 28%               | 27%               | 39%                 | 34%               | 36%               |
| 55-64                             | 9%                  | 14%               | 11%               | 8%                  | 17%               | 11%               |
| 65 or over                        | 1%                  | 1%                | 1%                | 0%                  | 1%                | 1%                |
| Not answered                      | 1%                  | 1%                | <1%               | 1%                  | 1%                | 0%                |
| Ethnicity                         |                     |                   |                   |                     |                   |                   |
| White                             | 82%                 | 80%               | 83%               | 92%                 | 94%               | 90%               |

|            | Intervention arm    |                   |                   | Control arm         |                   |                   |
|------------|---------------------|-------------------|-------------------|---------------------|-------------------|-------------------|
|            | Baseline<br>(n=438) | Year 1<br>(n=412) | Year 2<br>(n=418) | Baseline<br>(n=122) | Year 1<br>(n=155) | Year 2<br>(n=135) |
| Mixed race | 4%                  | 5%                | 5%                | 2%                  | 3%                | 3%                |
| Asian      | 6%                  | 5%                | 5%                | 1%                  | 1%                | 3%                |
| Black      | 5%                  | 9%                | 6%                | 3%                  | 1%                | 1%                |
| Other      | 1%                  | 1%                | 1%                | 0%                  | 1%                | 1%                |
| Not stated | <1%                 | 1%                | 1%                | 1%                  | 0%                | 1%                |

## Section B: Experience

|                                                                                                             | Intervention arm    |                   |                   | Control arm         |                   |                   |
|-------------------------------------------------------------------------------------------------------------|---------------------|-------------------|-------------------|---------------------|-------------------|-------------------|
|                                                                                                             | Baseline<br>(n=438) | Year 1<br>(n=412) | Year 2<br>(n=418) | Baseline<br>(n=122) | Year 1<br>(n=155) | Year 2<br>(n=135) |
| I have been able to support people with FEP to have more control in their lives:                            |                     |                   |                   |                     |                   |                   |
| <i>Always</i>                                                                                               | 16%                 | 15%               | 18%               | 24%                 | 15%               | 16%               |
| <i>Sometimes</i>                                                                                            | 62%                 | 50%               | 54%               | 60%                 | 55%               | 55%               |
| <i>Rarely</i>                                                                                               | 13%                 | 14%               | 13%               | 8%                  | 12%               | 10%               |
| <i>Never</i>                                                                                                | 5%                  | 9%                | 6%                | 3%                  | 9%                | 6%                |
| <i>Don't know</i>                                                                                           | 3%                  | 7%                | 6%                | 2%                  | 6%                | 11%               |
| <i>Not answered</i>                                                                                         | 2%                  | 5%                | 3%                | 3%                  | 2%                | 2%                |
| I have been able to support people with FEP to manage their physical, mental and social needs holistically: |                     |                   |                   |                     |                   |                   |
| <i>Always</i>                                                                                               | 24%                 | 27%               | 27%               | 25%                 | 22%               | 22%               |
| <i>Sometimes</i>                                                                                            | 58%                 | 47%               | 49%               | 63%                 | 57%               | 54%               |
| <i>Rarely</i>                                                                                               | 9%                  | 8%                | 10%               | 3%                  | 6%                | 7%                |
| <i>Never</i>                                                                                                | 3%                  | 7%                | 5%                | 3%                  | 8%                | 5%                |
| <i>Don't know</i>                                                                                           | 2%                  | 8%                | 6%                | 0%                  | 6%                | 9%                |
| <i>Not answered</i>                                                                                         | 3%                  | 5%                | 3%                | 5%                  | 2%                | 3%                |
| I have been able to support people with FEP to involve carers:                                              |                     |                   |                   |                     |                   |                   |
| <i>Always</i>                                                                                               | 29%                 | 25%               | 27%               | 30%                 | 31%               | 31%               |
| <i>Sometimes</i>                                                                                            | 52%                 | 43%               | 43%               | 60%                 | 48%               | 47%               |
| <i>Rarely</i>                                                                                               | 9%                  | 11%               | 12%               | 4%                  | 8%                | 8%                |
| <i>Never</i>                                                                                                | 4%                  | 8%                | 6%                | 2%                  | 7%                | 4%                |
| <i>Don't know</i>                                                                                           | 2%                  | 8%                | 9%                | 1%                  | 5%                | 7%                |
| <i>Not answered</i>                                                                                         | 3%                  | 5%                | 4%                | 4%                  | 1%                | 3%                |
| I feel appropriately trained and supervised to deliver psychological informed interventions:                |                     |                   |                   |                     |                   |                   |
| <i>Always</i>                                                                                               | 22%                 | 21%               | 21%               | 16%                 | 12%               | 19%               |
| <i>Sometimes</i>                                                                                            | 47%                 | 40%               | 38%               | 52%                 | 42%               | 45%               |
| <i>Rarely</i>                                                                                               | 15%                 | 14%               | 11%               | 11%                 | 19%               | 11%               |
| <i>Never</i>                                                                                                | 7%                  | 10%               | 8%                | 13%                 | 7%                | 6%                |
| <i>Don't know</i>                                                                                           | 5%                  | 11%               | 10%               | 4%                  | 8%                | 10%               |
| <i>Not answered</i>                                                                                         | 4%                  | 5%                | 13%               | 3%                  | 1%                | 9%                |
| I feel appropriately trained and supervised to deliver physical health assessment and intervention:         |                     |                   |                   |                     |                   |                   |

|                                                                                                       | Intervention arm    |                   |                   | Control arm         |                   |                   |
|-------------------------------------------------------------------------------------------------------|---------------------|-------------------|-------------------|---------------------|-------------------|-------------------|
|                                                                                                       | Baseline<br>(n=438) | Year 1<br>(n=412) | Year 2<br>(n=418) | Baseline<br>(n=122) | Year 1<br>(n=155) | Year 2<br>(n=135) |
| <i>Always</i>                                                                                         | 34%                 | 34%               | 29%               | 27%                 | 34%               | 37%               |
| <i>Sometimes</i>                                                                                      | 41%                 | 34%               | 39%               | 42%                 | 41%               | 33%               |
| <i>Rarely</i>                                                                                         | 12%                 | 10%               | 9%                | 14%                 | 10%               | 12%               |
| <i>Never</i>                                                                                          | 10%                 | 9%                | 8%                | 14%                 | 9%                | 7%                |
| <i>Don't know</i>                                                                                     | 3%                  | 8%                | 9%                | 2%                  | 3%                | 8%                |
| <i>Not answered</i>                                                                                   | 2%                  | 5%                | 6%                | 1%                  | 4%                | 3%                |
| I feel appropriately trained and supervised to deliver vocational support:                            |                     |                   |                   |                     |                   |                   |
| <i>Always</i>                                                                                         | 16%                 | 20%               | 15%               | 17%                 | 13%               | 19%               |
| <i>Sometimes</i>                                                                                      | 49%                 | 42%               | 44%               | 55%                 | 54%               | 51%               |
| <i>Rarely</i>                                                                                         | 23%                 | 16%               | 17%               | 19%                 | 21%               | 10%               |
| <i>Never</i>                                                                                          | 6%                  | 9%                | 9%                | 5%                  | 3%                | 7%                |
| <i>Don't know</i>                                                                                     | 4%                  | 10%               | 9%                | 3%                  | 5%                | 10%               |
| <i>Not answered</i>                                                                                   | 2%                  | 4%                | 6%                | 1%                  | 5%                | 3%                |
| I feel appropriately trained and supervised to deliver alcohol, smoking and substance misuse support: |                     |                   |                   |                     |                   |                   |
| <i>Always</i>                                                                                         | 22%                 | 22%               | 23%               | 30%                 | 22%               | 29%               |
| <i>Sometimes</i>                                                                                      | 58%                 | 46%               | 49%               | 50%                 | 58%               | 48%               |
| <i>Rarely</i>                                                                                         | 12%                 | 14%               | 11%               | 14%                 | 10%               | 10%               |
| <i>Never</i>                                                                                          | 5%                  | 5%                | 5%                | 5%                  | 4%                | 4%                |
| <i>Don't know</i>                                                                                     | 2%                  | 9%                | 9%                | 1%                  | 1%                | 7%                |
| <i>Not answered</i>                                                                                   | 1%                  | 4%                | 4%                | 1%                  | 5%                | 3%                |
| I believe service users and carers are involved in planning their care:                               |                     |                   |                   |                     |                   |                   |
| <i>Always</i>                                                                                         | 46%                 | 47%               | 45%               | 48%                 | 38%               | 47%               |
| <i>Sometimes</i>                                                                                      | 47%                 | 46%               | 47%               | 52%                 | 41%               | 52%               |
| <i>Rarely</i>                                                                                         | 4%                  | 2%                | 3%                | 1%                  | 4%                | 1%                |
| <i>Never</i>                                                                                          | 0%                  | 0%                | 1%                | 0%                  | 0%                | 0%                |
| <i>Don't know</i>                                                                                     | 1%                  | 3%                | 2%                | 0%                  | 2%                | 0%                |
| <i>Not answered</i>                                                                                   | 2%                  | 2%                | 2%                | 0%                  | 15%               | 1%                |
| I feel supported to carry out holistic assessment and care plans:                                     |                     |                   |                   |                     |                   |                   |
| <i>Always</i>                                                                                         | 44%                 | 42%               | 43%               | 46%                 | 47%               | 40%               |
| <i>Sometimes</i>                                                                                      | 39%                 | 36%               | 34%               | 43%                 | 34%               | 44%               |
| <i>Rarely</i>                                                                                         | 5%                  | 6%                | 4%                | 3%                  | 8%                | 5%                |
| <i>Never</i>                                                                                          | 3%                  | 5%                | 5%                | 4%                  | 2%                | 1%                |
| <i>Don't know</i>                                                                                     | 3%                  | 6%                | 8%                | 2%                  | 5%                | 5%                |
| <i>Not answered</i>                                                                                   | 6%                  | 5%                | 6%                | 2%                  | 5%                | 4%                |

## STROBE Statement—checklist of items that should be included in reports of observational studies

|                              | Item No | Recommendation                                                                                                                                                                                                                                                                                                                                                                                                                                                         | Page No         |
|------------------------------|---------|------------------------------------------------------------------------------------------------------------------------------------------------------------------------------------------------------------------------------------------------------------------------------------------------------------------------------------------------------------------------------------------------------------------------------------------------------------------------|-----------------|
| <b>Title and abstract</b>    | 1       | (a) Indicate the study's design with a commonly used term in the title or the abstract                                                                                                                                                                                                                                                                                                                                                                                 | 1               |
|                              |         | (b) Provide in the abstract an informative and balanced summary of what was done and what was found                                                                                                                                                                                                                                                                                                                                                                    | 2               |
| <b>Introduction</b>          |         |                                                                                                                                                                                                                                                                                                                                                                                                                                                                        |                 |
| Background/rationale         | 2       | Explain the scientific background and rationale for the investigation being reported                                                                                                                                                                                                                                                                                                                                                                                   | 4               |
| Objectives                   | 3       | State specific objectives, including any prespecified hypotheses                                                                                                                                                                                                                                                                                                                                                                                                       | 6               |
| <b>Methods</b>               |         |                                                                                                                                                                                                                                                                                                                                                                                                                                                                        |                 |
| Study design                 | 4       | Present key elements of study design early in the paper                                                                                                                                                                                                                                                                                                                                                                                                                | 6               |
| Setting                      | 5       | Describe the setting, locations, and relevant dates, including periods of recruitment, exposure, follow-up, and data collection                                                                                                                                                                                                                                                                                                                                        | 6               |
| Participants                 | 6       | (a) <i>Cohort study</i> —Give the eligibility criteria, and the sources and methods of selection of participants. Describe methods of follow-up<br><i>Case-control study</i> —Give the eligibility criteria, and the sources and methods of case ascertainment and control selection. Give the rationale for the choice of cases and controls<br><i>Cross-sectional study</i> —Give the eligibility criteria, and the sources and methods of selection of participants | 7/8             |
|                              |         | (b) <i>Cohort study</i> —For matched studies, give matching criteria and number of exposed and unexposed<br><i>Case-control study</i> —For matched studies, give matching criteria and the number of controls per case                                                                                                                                                                                                                                                 |                 |
| Variables                    | 7       | Clearly define all outcomes, exposures, predictors, potential confounders, and effect modifiers. Give diagnostic criteria, if applicable                                                                                                                                                                                                                                                                                                                               | 8               |
| Data sources/<br>measurement | 8*      | For each variable of interest, give sources of data and details of methods of assessment (measurement). Describe comparability of assessment methods if there is more than one group                                                                                                                                                                                                                                                                                   | NA <sup>+</sup> |
| Bias                         | 9       | Describe any efforts to address potential sources of bias                                                                                                                                                                                                                                                                                                                                                                                                              | 17-<br>19       |
| Study size                   | 10      | Explain how the study size was arrived at                                                                                                                                                                                                                                                                                                                                                                                                                              | 8               |
| Quantitative variables       | 11      | Explain how quantitative variables were handled in the analyses. If applicable, describe which groupings were chosen and why                                                                                                                                                                                                                                                                                                                                           | 9               |
| Statistical methods          | 12      | (a) Describe all statistical methods, including those used to control for confounding                                                                                                                                                                                                                                                                                                                                                                                  | 9               |
|                              |         | (b) Describe any methods used to examine subgroups and interactions                                                                                                                                                                                                                                                                                                                                                                                                    | 9               |
|                              |         | (c) Explain how missing data were addressed                                                                                                                                                                                                                                                                                                                                                                                                                            | 9               |
|                              |         | (d) <i>Cohort study</i> —If applicable, explain how loss to follow-up was addressed<br><i>Case-control study</i> —If applicable, explain how matching of cases and controls was addressed<br><i>Cross-sectional study</i> —If applicable, describe analytical methods taking account of sampling strategy                                                                                                                                                              | 9               |
|                              |         | (e) Describe any sensitivity analyses                                                                                                                                                                                                                                                                                                                                                                                                                                  |                 |

| <b>Results</b>           |     |                                                                                                                                                                                                                                                                                                                                                                                                               |                 |
|--------------------------|-----|---------------------------------------------------------------------------------------------------------------------------------------------------------------------------------------------------------------------------------------------------------------------------------------------------------------------------------------------------------------------------------------------------------------|-----------------|
| Participants             | 13* | (a) Report numbers of individuals at each stage of study—eg numbers potentially eligible, examined for eligibility, confirmed eligible, included in the study, completing follow-up, and analysed<br>(b) Give reasons for non-participation at each stage<br>(c) Consider use of a flow diagram                                                                                                               | Table 1         |
| Descriptive data         | 14* | (a) Give characteristics of study participants (eg demographic, clinical, social) and information on exposures and potential confounders<br>(b) Indicate number of participants with missing data for each variable of interest<br>(c) <i>Cohort study</i> —Summarise follow-up time (eg, average and total amount)                                                                                           | Table 1         |
| Outcome data             | 15* | <i>Cohort study</i> —Report numbers of outcome events or summary measures over time<br><i>Case-control study</i> —Report numbers in each exposure category, or summary measures of exposure<br><i>Cross-sectional study</i> —Report numbers of outcome events or summary measures                                                                                                                             | Tables          |
| Main results             | 16  | (a) Give unadjusted estimates and, if applicable, confounder-adjusted estimates and their precision (eg, 95% confidence interval). Make clear which confounders were adjusted for and why they were included<br>(b) Report category boundaries when continuous variables were categorized<br>(c) If relevant, consider translating estimates of relative risk into absolute risk for a meaningful time period | Tables          |
| Other analyses           | 17  | Report other analyses done—eg analyses of subgroups and interactions, and sensitivity analyses                                                                                                                                                                                                                                                                                                                | Tables<br>Pg 10 |
| <b>Discussion</b>        |     |                                                                                                                                                                                                                                                                                                                                                                                                               |                 |
| Key results              | 18  | Summarise key results with reference to study objectives                                                                                                                                                                                                                                                                                                                                                      | 19              |
| Limitations              | 19  | Discuss limitations of the study, taking into account sources of potential bias or imprecision. Discuss both direction and magnitude of any potential bias                                                                                                                                                                                                                                                    | 19              |
| Interpretation           | 20  | Give a cautious overall interpretation of results considering objectives, limitations, multiplicity of analyses, results from similar studies, and other relevant evidence                                                                                                                                                                                                                                    | 17              |
| Generalisability         | 21  | Discuss the generalisability (external validity) of the study results                                                                                                                                                                                                                                                                                                                                         | 19              |
| <b>Other information</b> |     |                                                                                                                                                                                                                                                                                                                                                                                                               |                 |
| Funding                  | 22  | Give the source of funding and the role of the funders for the present study and, if applicable, for the original study on which the present article is based                                                                                                                                                                                                                                                 | 19              |

\*Give information separately for cases and controls in case-control studies and, if applicable, for exposed and unexposed groups in cohort and cross-sectional studies.

**Note:** An Explanation and Elaboration article discusses each checklist item and gives methodological background and published examples of transparent reporting. The STROBE checklist is best used in conjunction with this article (freely available on the Web sites of PLoS Medicine at <http://www.plosmedicine.org/>, Annals of Internal Medicine at <http://www.annals.org/>, and Epidemiology at <http://www.epidem.com/>). Information on the STROBE Initiative is available at [www.strobe-statement.org](http://www.strobe-statement.org).

+ Not possible as data collected from various sources across intervention and comparator site (depending on how information collected by services in real world setting). Data dictionary produced for researchers to allow for this.



# BMJ Open

**Results of a prospective, mixed methods study to assess feasibility, acceptability, and effectiveness of TRIumPH (Treatment and Recovery In Psychosis), an Integrated Care Pathway for Psychosis, compared to usual treatment.**

|                                 |                                                                                                                                                                                                                                                                                                                                                                                                                                                                  |
|---------------------------------|------------------------------------------------------------------------------------------------------------------------------------------------------------------------------------------------------------------------------------------------------------------------------------------------------------------------------------------------------------------------------------------------------------------------------------------------------------------|
| Journal:                        | <i>BMJ Open</i>                                                                                                                                                                                                                                                                                                                                                                                                                                                  |
| Manuscript ID                   | bmjopen-2019-033711.R1                                                                                                                                                                                                                                                                                                                                                                                                                                           |
| Article Type:                   | Original research                                                                                                                                                                                                                                                                                                                                                                                                                                                |
| Date Submitted by the Author:   | 16-Jan-2020                                                                                                                                                                                                                                                                                                                                                                                                                                                      |
| Complete List of Authors:       | Rathod, Shanaya; Southern Health NHS Foundation Trust, Psychiatry Thorne, Kerensa<br>Graves, Elizabeth; Southern Health NHS Foundation Trust, Research and Development<br>Phiri, Peter; Southern Health NHS Foundation Trust<br>Asher, Carolyn; Southern Health NHS Foundation Trust<br>Griffiths, Alison; Wessex Academic Health Sciences Network<br>Read, Tracy; Dorset HealthCare NHS Foundation Trust<br>Kingdon, David; University of Southampton, Medicine |
| <b>Primary Subject Heading</b>: | Mental health                                                                                                                                                                                                                                                                                                                                                                                                                                                    |
| Secondary Subject Heading:      | Evidence based practice, Medical management, Health services research                                                                                                                                                                                                                                                                                                                                                                                            |
| Keywords:                       | Adult psychiatry < PSYCHIATRY, Early Intervention, Integrated Care Pathways, Schizophrenia & psychotic disorders < PSYCHIATRY                                                                                                                                                                                                                                                                                                                                    |
|                                 |                                                                                                                                                                                                                                                                                                                                                                                                                                                                  |

SCHOLARONE™  
Manuscripts



I, the Submitting Author has the right to grant and does grant on behalf of all authors of the Work (as defined in the below author licence), an exclusive licence and/or a non-exclusive licence for contributions from authors who are: i) UK Crown employees; ii) where BMJ has agreed a CC-BY licence shall apply, and/or iii) in accordance with the terms applicable for US Federal Government officers or employees acting as part of their official duties; on a worldwide, perpetual, irrevocable, royalty-free basis to BMJ Publishing Group Ltd ("BMJ") its licensees and where the relevant Journal is co-owned by BMJ to the co-owners of the Journal, to publish the Work in this journal and any other BMJ products and to exploit all rights, as set out in our [licence](#).

The Submitting Author accepts and understands that any supply made under these terms is made by BMJ to the Submitting Author unless you are acting as an employee on behalf of your employer or a postgraduate student of an affiliated institution which is paying any applicable article publishing charge ("APC") for Open Access articles. Where the Submitting Author wishes to make the Work available on an Open Access basis (and intends to pay the relevant APC), the terms of reuse of such Open Access shall be governed by a Creative Commons licence – details of these licences and which [Creative Commons](#) licence will apply to this Work are set out in our licence referred to above.

Other than as permitted in any relevant BMJ Author's Self Archiving Policies, I confirm this Work has not been accepted for publication elsewhere, is not being considered for publication elsewhere and does not duplicate material already published. I confirm all authors consent to publication of this Work and authorise the granting of this licence.

1  
2  
3 **Results of a prospective, mixed methods study to assess feasibility,**  
4 **acceptability, and effectiveness of TRlumPH (Treatment and Recovery In**  
5 **Psychosis), an Integrated Care Pathway for Psychosis, compared to usual**  
6 **treatment.**  
7  
8  
9  
10  
11  
12  
13

14 Shanaya Rathod<sup>1\*</sup>, Kerensa Thorne<sup>1</sup>, Elizabeth Graves<sup>1</sup>, Peter Phiri<sup>1</sup>, Carolyn Asher<sup>1</sup>,  
15 Alison Griffiths<sup>2</sup>, Tracy Read<sup>3</sup>, David Kingdon<sup>4</sup>  
16  
17  
18  
19  
20

21 1 Southern Health NHS Foundation Trust, United Kingdom  
22

23 2 Wessex Academic Health Sciences Network, United Kingdom  
24

25 3 Dorset Healthcare University NHS Foundation Trust, United Kingdom  
26

27 4 University of Southampton, Southampton, United Kingdom  
28  
29  
30  
31  
32  
33  
34

35 **\*Corresponding author:** Dr Shanaya Rathod  
36

37 Email address: shanayarathod@nhs.net  
38

39 Phone: 023 8047 5373  
40

41 Address: Research Department, Clinical Trials Facility, Tom Rudd Unit, Moorgreen  
42 Hospital, Southampton, SO30 3JB  
43  
44  
45  
46  
47  
48  
49  
50  
51  
52  
53  
54  
55  
56  
57  
58  
59  
60

## Abstract

**Objectives:** To evaluate whether a newly developed care pathway, TRlumPH (Treatment and Recovery In Psychosis) is feasible, acceptable and effective in meeting NICE quality standards in a timely manner.

**Methods:** This was a pragmatic, non-randomised, prospective, mixed methods study comparing an implementation (TRlumPH) and comparator site (not implementing TRlumPH) across three cohorts to assess feasibility, acceptability and effectiveness of the integrated pathway.

**Setting:** NHS Early Intervention in Psychosis (EIP) services at two NHS. .

**Participants:** All patients accepted into EIP services between 1 June 2014 and 31 May 2017 were each followed up for one year within their respective cohorts.

**Methodology:** Quantitative data consisted of routinely collected clinical data retrieved from patient records to assess whether the implementation of TRlumPH achieved better concordance to NICE standards. These included: time to access services, physical health assessments, clinical outcomes based timeliness of delivery, acute data. The controlled trial has evaluated the effect of TRlumPH (Intervention) with Care As Usual (Comparator). Qualitative measures consisted of questionnaires, interviews and focus groups to assess acceptability and satisfaction. Outcome measures were compared within the baseline, year 1 and year 2 cohorts and between the two sites.

**Results:** Quantitative data was statistically analysed by comparing means and proportions. Time to assessment improved in the implementation site and remained within the target in comparator site. Meeting of quality standards increased substantially in the implementation site but was more variable and reached lower

1  
2  
3 levels in the comparator site especially for physical health standards. Cognitive  
4 therapy for psychosis, family intervention, carer and employment support were all  
5 offered to a greater extent in the implementation site and uptake increased over the  
6 period.  
7  
8  
9  
10  
11  
12  
13

14 **Conclusions:** Pathway implementation generally led to greater improvements in  
15 achievement of access and quality standards compared to comparator site.  
16  
17  
18  
19  
20

### 21 **Strengths and Limitations**

- 22 • This is the first and only evaluation of a psychosis care pathway, especially  
23 since the access and waiting time standard
  - 24 • Results will be generalizable to NHS and managed care organisations as this  
25 study was delivered in real world setting
  - 26 • Pragmatic nature of the study meant that baseline differences between the  
27 sites could potentially affect interpretation of the results. The exploratory nature of  
28 this study meant that power or sample size calculations were not performed. The  
29 conclusions need to be interpreted in light of this methodology
  - 30 • Two sites initially planned to participate and expand this research withdrew  
31 during the course of the study due to inability to provide required data. The sites  
32 were from implementation and comparator groups each
  - 33 • Routine data was used to evaluate implementation which had the  
34 disadvantage of significant amounts of missing data in some areas.
  - 35 • Financial and human resource limitations may have impact on results
- 36  
37  
38  
39  
40  
41  
42  
43  
44  
45  
46  
47  
48  
49  
50  
51  
52  
53  
54  
55  
56  
57  
58  
59  
60

1  
2  
3 **Study registration:** UK Clinical Research Network Portfolio: 19187  
4  
5  
6  
7

8 **Keywords:** Integrated Care Pathway, psychosis, access, early intervention  
9  
10  
11

12 **Word count:** 3965  
13  
14  
15  
16  
17  
18  
19  
20  
21  
22  
23  
24  
25  
26  
27  
28  
29  
30  
31  
32  
33  
34  
35  
36  
37  
38  
39  
40  
41  
42  
43  
44  
45  
46  
47  
48  
49  
50  
51  
52  
53  
54  
55  
56  
57  
58  
59  
60

For peer review only

## Background

Schizophrenia is listed as the 8<sup>th</sup> leading cause of DALYs worldwide in the age group 15 - 44 years in the World Health Report<sup>1</sup>. In addition to the direct cost, there is a considerable burden on the relatives<sup>2</sup> and life expectancy is reduced by approximately 15-20 years, mostly because of physical health problems<sup>3</sup>.

A primary factor contributing to the impact of schizophrenia is that the longer the duration of untreated psychosis (DUP) the worse the outlook especially for social functioning and recovery<sup>4,5</sup>. DUP has been found to be the strongest predictor of symptom severity and prognosis<sup>6</sup>. A meta-analysis showed a mean DUP of 61.3 weeks<sup>7</sup> and further evidence from trans-cultural and international research suggests that DUP ranges between 364 and 721 days<sup>5,6</sup> and so reducing DUP is of individual, national and international importance<sup>7</sup>.

In order to address both the impact of schizophrenia and the length of DUP the UK government strategy 'No Health Without Mental Health'<sup>8</sup> acknowledged that more must be done to address the disparity in care for people experiencing psychosis. It highlighted the importance of prevention, early detection, and support for evidence-based models such as Early Intervention in Psychosis (EIP) services. The National Access and Waiting Time (AWTS) standard for psychosis<sup>9</sup> announced in England from 1 April 2016 required that more than 50% of people experiencing a first episode psychosis should commence a National Institute of Health and Care Excellence (NICE) recommended package of care<sup>10</sup> within two weeks of referral to secondary care services. This action was specifically introduced to reduce DUP and ensure people access services and start treatment in a timely manner.

1  
2  
3 In addition to the introduction of care standards the Five Year Forward View (NHS  
4 England)<sup>11</sup> recommended development of standardized care pathways for every major  
5 mental health condition. Evidenced-based integrated pathways provide a  
6 standardised framework for good clinical practice, reduce variation in care and  
7 improving outcomes for patients through providing timely access and intervention<sup>12</sup>.  
8 Standardised pathways improve quality by improving multidisciplinary communication  
9 with different care agencies using care planning and improve patient satisfaction<sup>13</sup>.  
10 NICE has formulated quality standards for treatment of schizophrenia and psychosis<sup>10</sup>  
11 but does not prescribe timeframes.  
12  
13  
14  
15  
16  
17  
18  
19  
20  
21  
22  
23  
24

25 TRlumPH (Treatment and Recovery In Psychosis) is a co-developed, integrated care  
26 pathway for psychosis that prescribes time frames around access and clinical  
27 interventions as developed in England<sup>14,15,16</sup>. The work has used a similar approach to  
28 that taken to improve care in other health areas like acute stroke care<sup>13</sup> and has  
29 produced a demonstrable improvement in outcomes for patients and carers. This new  
30 psychosis pathway aims to reduce the impact of disease and promote recovery by  
31 ensuring that every individual gets the best evidence-based care at the right time and  
32 in the right place.  
33  
34  
35  
36  
37  
38  
39  
40  
41  
42  
43

44 In developing the pathway, a multi-pronged approach has been used, using i)  
45 intelligence from information, ii) co-production with individuals with lived experience of  
46 mental illness and their carers, and iii) engagement with clinicians and other  
47 stakeholders including commissioners, primary care and third sector organisations.  
48 The development of TRlumPH used a robust methodology, outlined in previous  
49 publications by this group, which can be adapted and adopted nationally and  
50 internationally<sup>14,15,16</sup>.  
51  
52  
53  
54  
55  
56  
57  
58  
59  
60



1  
2  
3 Therefore, the pathway goals are to treat the symptoms as early as possible, provide  
4 skills to patients and their families, maintain the improvement over a period, prevent  
5 relapses and reintegrate the individuals into the community so that they can lead as  
6 normal a life as possible.  
7  
8  
9  
10  
11  
12  
13  
14  
15

## 16 **Study objectives**

17  
18 The objective of this study was to assess the feasibility, acceptability and effectiveness  
19 of the TRlumPH psychosis care pathway.  
20  
21

- 22  
23 - Does implementation of TRlumPH improve standards in line with the NICE  
24 quality standards as measured by: time taken to access services and waiting  
25 times, lengths of hospital stay, clinical outcomes based on HoNOS scores,  
26 treatment options offered and how timely the delivery of these were?  
27  
28  
29  
30  
31
- 32 - How did staff members, service users and carers experience the  
33 implementation of the pathway? Was it feasible and acceptable?  
34  
35  
36  
37  
38

## 39 **Methods**

### 40 **Study design**

41  
42 This is a prospective, mixed methods, pragmatic<sup>17</sup> and non-randomised study  
43 comparing the intervention implementation (TRlumPH pathway) and comparison site  
44 that had treatment as usual to evaluate feasibility, acceptability and effectiveness of  
45 an integrated care pathway, TRlumPH. Both qualitative and quantitative data were  
46 collected and analysed.  
47  
48  
49  
50  
51  
52  
53  
54  
55  
56  
57  
58  
59  
60

## Setting

The study originally had four NHS sites: Early Intervention in Psychosis (EIP) teams from two pathway implementation and two comparator organisations. However, one pathway and one comparator site withdrew in the early stages due to an inability to provide necessary data. The remaining two NHS sites had pre-existing EIP teams who were working to principles originally set out in the NHS Plan (2000).

### Implementation site

The implementation site was an NHS Trust in the south of England implementing the pathway and covers a population of 1.3 million. This site had four EIP service teams. The Trust was predicted to have an incidence of psychosis of 100 patients (Psymaptic.org).

### Comparator site

The comparator was an NHS Trust in the south of England and covers a population of 780 000. This site had two EIP teams at the start of the study. Due to the needs of the service these two teams were amalgamated into one team during the study period. This Trust was predicted to have an incidence of psychosis of 54 patients (Psymaptic.org).

## Intervention

TRlumPH is an integrated care pathway for psychosis that emphasises the importance of timely access and interventions (see Figure 1). The development, design and details of this pathway have been described in detail in the protocol paper<sup>15</sup> and in other publications<sup>14,16</sup>.

## Treatment as Usual

Participants in the comparator site received treatment as usual (TAU). This usually consisted of care coordination and outpatient appointments when needed. Access to psychological treatments and physical health interventions had been variable. The AWTS target was launched in April 2016, one year after the study started and will have influenced access to treatment in both the implementation and comparator site as a national standard for seeing referrals within two weeks was established. Other requirements for the standard included physical health assessments and availability of treatments.

## Research Ethics Approval and Safety Assessments

Ethics approval was obtained from East of Scotland Research Ethics Service (REC Ref no: LR/15/ES/0091). Written consent was taken for all those providing data for the questionnaires, focus groups and interviews. Quantitative data used for the study was limited to that routine collected as part of clinical care and consent to access for research purposes was not sought by individual but approved via NHS Ethics Service. No adverse events were identified as a direct result of implementation of the pathway.

## Patient and Public Involvement

Co-production workshops were held with patients, carers and clinicians to develop the pathway and key outcomes areas and a service user researcher sat on the study team. For further details see the previously published protocol<sup>15</sup>.

## Outcome measures

Feasibility and acceptability were assessed through both qualitative and quantitative data collection regarding recruitment, retention and adherence to the process. These measures were defined based on TRIumPH pathway<sup>15,16</sup> and NICE recommendations<sup>10</sup>.

### Quantitative measures:

- Timeliness of access: Waiting times from EIP referral and central triage points, time to allocation and engagement with a care coordinator, time to multidisciplinary team discussion, time to medical formulation, time to care planning approach (CPA meeting), time to risk assessment completion (See figure 1)
- NICE recommended interventions offered: medication, physical health assessment (within three months in accordance with NICE quality standard), psychological intervention (offered within six months), carers support, family intervention, employment support
- Clinical outcomes: Severity of symptoms (HoNoS scores), number of acute admissions during referral, length of hospital stay, mental health act (MHA) sections during referral, A&E attendance and contact with acute mental health services post EIP referral.
- Reason for discharge to assess appropriateness of referrals

These measures were collected for each cohort of participants from the time of their referral for one year. The Health of the Nation Outcome Scales (HoNOS)<sup>18</sup> were the source of clinical outcome data collected routinely in the NHS including

1  
2  
3 in EIP. It comprises twelve scales covering health and social care using a severity  
4  
5 measure from 0-4 with 2-4 signifying clinically significant disorder.  
6  
7  
8  
9

### 10 Qualitative measures

11  
12 Satisfaction and acceptability were assessed using questionnaires, interviews and  
13  
14 focus groups. This consisted of the following: patient experience (using specifically  
15  
16 designed patient experience focus groups/interviews), staff experience (staff  
17  
18 questionnaires and focus groups designed to measure the impact of the pathway on  
19  
20 staff experience), and carer experience (using carer focus groups/interviews). Staff  
21  
22 experience was assessed at baseline and after 12 and 24 months, carer and service  
23  
24 user experience was assessed at 12 and 24 months.  
25  
26  
27  
28

### 29 **Sample size**

30  
31  
32 As this was a prospective and pragmatic study, no a priori power and sample size  
33  
34 calculations were performed or required as routinely collected and available data for  
35  
36 all patients and staff during the study period was used.  
37  
38  
39  
40  
41

### 42 **Data Collection**

43  
44 Baseline data was collected for the period 1 June 2014 – 31 May 2015. The pathway  
45  
46 was launched on 1 June 2015 and disseminated to four EIP teams in the  
47  
48 implementation site. Data was collected over the subsequent two-year period on every  
49  
50 patient that was referred to and accepted by the EIP teams in participant  
51  
52 organisations. This led to the following cohorts who were all followed up for one year:  
53  
54

55 Baseline (referral received 1 June 2014 – 31 May 2015)

56  
57 Year 1 (referral received 1 June 2015 – 31 May 2016)  
58  
59  
60

1  
2  
3 Year 2 (referral received 1 June 2016 – 31 May 2017)  
4

### 5 **Qualitative methods**

6  
7 Staff, patients and carers were approached via the mental health teams they were  
8 currently engaged with. Patients and carers showed a preference to semi-structured  
9 interviews rather than attending offered focus groups. All focus groups and interviews  
10 were audio recorded, transcribed and then coded and analysed using thematic  
11 analysis<sup>19</sup>. Thematic analysis was inductive using themes developed from the data  
12 produced by the structured scripts and remained at a semantic level to allow for a  
13 description of the views reported. Staff was also invited to complete a questionnaire  
14 to explore the impact of the pathway on staff experience and enable comparisons  
15 across the three time points (baseline, 12 & 24 months).  
16  
17  
18  
19  
20  
21  
22  
23  
24  
25  
26  
27  
28  
29

### 30 **Statistical Analysis**

31  
32 Continuous normal data was summarised by mean and standard deviation, with  
33 comparisons to baseline made using t-tests. Continuous data that is non-normal as  
34 tested by Kolmogorov-Smirnov or Shapiro-Wilk tests, was presented by median and  
35 interquartile range (IQR) and compared using Mann-Whitney U test. Categorical  
36 variables were presented as n (%) and compared using Chi-Square or Fisher's Exact  
37 test as appropriate. However, no statistical comparisons were undertaken when the  
38 event rates in most groups were <5.  $p < 0.05$  was assumed to indicate statistical  
39 significance. Missing data was excluded on a case-by-case basis. Statistical analyses  
40 were undertaken using IBM SPSS Statistics 19 and R 3.4.2.  
41  
42  
43  
44  
45  
46  
47  
48  
49  
50  
51  
52  
53  
54  
55  
56  
57  
58  
59  
60

## Results

The participant information and demographic data is presented in Table 1. The demographic characteristics of individuals in both comparator and pathway site was broadly similar throughout the study period, with around 3 in 5 of subjects being male, and the majority being of White Caucasian ethnicity (88-93%), unemployed (26-54%) and residing in mainstream housing (76-88%).

In both sites, the most common source of referral to EIP services was primary care, making up between 55 to 63% of referrals, followed by other mental health services (6-23%) and then Emergency Departments (2-9%).

Table 1 here

### **Quantitative Results**

#### **Timeliness of access**

Table 2 here

Waiting times (shown in table 2) for EIP assessment from both EIP referral and central triage points (teams where referrals received) reduced significantly compared with baseline, from median 11 to 7 days, and from 20 to 11 days respectively ( $p < 0.0001$  for both) in the implementation site. Conversely, in the comparator site the median waiting time from EIP referral to assessment increased significantly from 7 to 12 days ( $p < 0.0001$ ) and was unchanged from central triage to assessment at 33 days ( $p = 0.56$ ).

1  
2  
3 This suggests an improvement in assessment speed following referral to services in  
4 the implementation site.  
5  
6  
7  
8  
9

10 The pathway implementation site also saw significantly reduced waiting times for  
11 allocation to and engagement by care co-ordinator, Multidisciplinary team (MDT)  
12 discussions, risk assessment completion and discharge of service users found  
13 unsuitable for the service on assessment ( $p < 0.0001$  for all). There was no statistically  
14 significant difference in the time to medical formulation or Care Programme Approach  
15 development (CPA). In the comparator site, time to allocation and engagement by care  
16 co-ordinator remained unchanged at median 0 days throughout the study. Although  
17 not significantly different from baseline in year 1, by year 2 time to MDT discussion  
18 and to risk assessment completion had both increased significantly ( $p < 0.0001$  for  
19 both).  
20  
21  
22  
23  
24  
25  
26  
27  
28  
29  
30  
31  
32  
33  
34

35 The numbers of patients accepted onto the EIP case load were much higher than  
36 expected in the comparator site, but this reduced to nearer the expected levels during  
37 the course of the project. The implementation site started below but rose to just above  
38 expected levels.  
39  
40  
41  
42  
43  
44  
45  
46

47 Reasons for discharge from EIP services remained similar in the comparator site  
48 throughout the study. However, in the implementation site there was a significant  
49 change, seemingly led by an increase in the number of unsuitable referrals to the  
50 service, which increased from 55% to 81%. Non-acceptance was also broadly similar  
51 as it was agreed with sites that 'did not meet EIP criteria' and 'discharged on  
52 professional advice' effectively meant the same thing.  
53  
54  
55  
56  
57  
58  
59  
60



## NICE recommended interventions offered

### *Physical Health Assessments*

Table 3 here

Both sites of the study saw significant improvements in the proportion of individuals receiving assessments of their general physical health, substance use, alcohol use and weight, having their bloods taken and given ECGs, but at much higher levels in the implementation site as seen in Table 3. Assessment of smoking status increased significantly at the implementation site ( $p=0.00033$ ). Measurements of pulse and blood pressure assessments increased significantly in the comparator site ( $p=0.010$ ,  $p=0.0036$ ). Assessment of waist measurement increased significantly in the pathway implementation site ( $p=0.011$ ) whilst decreasing significantly in the comparator site ( $p=0.0037$ ). Finally, neither site significantly increased the number of individuals receiving a full 8-point NICE recommended health check within 8 weeks of EIP assessment.

### *Other Interventions*

The proportion of individuals being offered CBT (Cognitive Behaviour Therapy) increased significantly in the comparator site from 1% to 22% ( $p<0.0001$ ) and was matched with a significant increase in taking up CBT intervention from 0% to 7% ( $p=0.010$ ). The implementation site did not see any significant change in either of these

1  
2  
3 factors. However throughout the period, CBT for psychosis and family work for  
4 psychosis were much more likely to be offered (Table 3).  
5  
6  
7  
8  
9

10 Prevalence of individuals receiving any of the listed interventions increased in both the  
11 pathway (83% to 94%,  $p=0.0071$ ) and comparator sites (57% to 81%,  $p<0.0001$ ), as  
12 did engagement (75% to 90%,  $p=0.039$  and 57% to 79%,  $p<0.0001$  respectively) from  
13 baseline to year 2.  
14  
15  
16  
17  
18  
19  
20

21 The implementation site saw increases in the proportion of participants receiving carer  
22 support (35% to 68%,  $p<0.0001$ ) and medication (54% to 73%,  $p=0.027$ ), although  
23 neither of these changed significantly in the comparator site. Receipt of collaborative  
24 care planning increased significantly in the implementation site (32% to 69%,  
25  $p<0.0001$ ) whilst the comparator site saw a decrease (31% to 1%,  $p<0.0001$ ).  
26 Prevalence of physical health interventions also decreased in the comparator site  
27 (26% to 15%,  $p<0.0001$ ) but did not change significantly in the implementation site,  
28 remaining low (3% to 6%,  $p=0.58$ ). Receipt of vocational support increased  
29 significantly in both the implementation site (20% to 72%,  $p<0.0001$ ) and the  
30 comparator site (20% to 39%,  $p=0.0023$ ). However subsequently, after six months,  
31 there was a much higher take-up rate with over 80% in the implementation and over  
32 70% in the comparator site.  
33  
34  
35  
36  
37  
38  
39  
40  
41  
42  
43  
44  
45  
46  
47  
48  
49  
50

51 Table 4 here  
52  
53  
54  
55  
56  
57  
58  
59  
60

## Clinical Outcomes

### *Acute care*

There was a substantial contrast in the numbers of patients who had been admitted to hospital at the point of referral, much higher in the implementation site compared to comparator but reducing over time (table 4). Further admissions were low across both sites with neither site seeing a significant change in the prevalence of acute mental health admissions, in the time to being admitted or in the time to discharge. Similarly, the number of EIP participants subject to MHA section did not change significantly, although there was a tendency towards a decrease in the implementation site (36% to 33% to 27%,  $p=0.58$ ). In both sites, the number of EIP service users attending Emergency Department (ED) or general hospital within a year was low (7-10%) and there were no significant changes over time.

### *Crisis planning*

In the implementation site, the proportion of participants having a crisis plan completed reduced significantly (51% to 35%,  $p=0.032$ ), occurring alongside a decrease in the time to crisis plan completion (50.0 to 12.5 weeks,  $p<0.0001$ ) as seen in table 4. Conversely, in the comparator site the proportion of participants having a crisis plan completed increased significantly (49% to 67%,  $p=0.00023$ ).

Table 5 here

### *Clinical and social outcomes*

These were assessed by extracting the data routinely collected using the Health of the Nation Outcome Scales (HoNOS) as seen in table 5. At the implementation site there were significant reductions over the two-year period in 'problems with relationships' ( $p=0.013$ ) and 'problems with occupation and activities' ( $p=0.037$ ). At the comparator site there were significant reductions in 'problems with activities of daily living' ( $p=0.04$ ). The comparator site however had substantial amounts of missing data. There was no significant difference in reductions in 'problems with delusions and hallucinations' between sites.

### *Criminal justice system contact*

The number of participants having contact with the criminal justice system decreased significantly in the implementation site (22% to 3%,  $p<0.0001$ ) whilst increasing significantly in the comparator site (14% to 21%,  $p<0.0001$ ). Criminal convictions were rare in both sites (table 4).

### *Discharge and death*

Discharge from services within a year of patients accepted by EIP teams (Table 2), was relatively low although disengagement remained a concern. It reduced in the implementation site (18% to 11%) and remained stable in comparator (10% to 12%). There was one death of a participant within a year of EIP assessment in the comparator site, Year 2 cohort (Table 4).

## **Qualitative Results**

### *Staff and patient interviews and focus groups*

1  
2  
3 Across the two years, 64 staff in the implementation site took part in focus groups and  
4 reported that the psychosis pathway appeared to be beneficial, well embedded and a  
5 positive change with good team working within the teams and with other services.  
6  
7 However, they found workload to be high and had some difficulties getting the right  
8 staff skills mix in teams to deliver all the needed interventions. They also noted that  
9 often interventions were offered but were not always completed due to patient's ability  
10 to engage with them. Additionally, they worried about future changes being  
11 implemented in addition to their current workload. They felt by year 2 that they were  
12 more able to adapt the pathway to individuals' needs which they saw as important  
13 rather than a prescriptive measure.  
14  
15  
16  
17  
18  
19  
20  
21  
22  
23  
24  
25  
26  
27  
28

29 Patients (14 participants) in the implementation site reported that they were generally  
30 satisfied with being seen quickly and developed good relationships with the staff  
31 members. They found appointments helpful and felt they gained useful skills.  
32  
33 However, they also reported that at times there was inconsistencies in the staff they  
34 saw and out of hours services could be improved. Carers views (7) in the  
35 implementation site appeared to improve from year 1 to year 2 with more positive  
36 reports about the team and services than at year 1, however at both time points the  
37 sample was small.  
38  
39  
40  
41  
42  
43  
44  
45  
46  
47  
48

#### 49 *Results from staff questionnaires*

50  
51 In total 1,680 questionnaires were completed by staff members in the implementation  
52 and comparator site across the three time points. There was no significant change in  
53 staff experience across the time points or between the sites (Supplementary Table 1).  
54  
55 All staff members with adult mental health services were eligible to complete this  
56  
57  
58  
59  
60

1  
2  
3 questionnaire to capture the experience of staff referring into services and caring for  
4  
5 services users with psychosis in services such as hospital settings.  
6  
7  
8  
9

## 10 11 **Discussion**

12  
13  
14 This comparison study provides evidence that the introduction of an integrated  
15  
16 psychosis care pathway led to improvements in access to EIP and implementation of  
17  
18 quality standards, especially for physical health care in comparison with a site which  
19  
20 did not implement the pathway. In terms of acceptability and feasibility, staff, service  
21  
22 user and carer attitudes to TRIumPH were found to be generally positive. However,  
23  
24 there were pre-existing differences between the sites which influenced the comparison  
25  
26 as seen by access and waiting times, and level of interventions offered during the  
27  
28 baseline period. Prior to the project, the implementation site had dismantled three out  
29  
30 of four EIP teams and integrated them into community mental health teams, in contrast  
31  
32 to the comparator site which had maintained specialist teams. At the beginning of the  
33  
34 project the implementation site reintroduced the four EIP teams. A marked difference  
35  
36 in referrals occurred in each site with movement in both towards predicted levels of  
37  
38 patients accepted by EIP teams.  
39  
40  
41  
42  
43  
44  
45

46 Time to assessment improved in the implementation site and remained within the  
47  
48 AWTS in the comparator site. Referral from the Central Triage Point was relatively  
49  
50 high especially in the comparator site, as was found by Birchwood and colleagues<sup>20</sup>  
51  
52 and this remains a very important area for attention.  
53  
54  
55  
56  
57  
58  
59  
60

1  
2  
3 Meeting of quality standards increased substantially in the implementation site but was  
4 more variable and reached lower levels in the comparator site. This was especially  
5 noticeable for physical health standards, although the full set of NICE  
6 recommendations was still only met in under 10% patients within 3 months of  
7 acceptance. In the implementation site, offering of CBT for psychosis was relatively  
8 high throughout, although uptake within 6 months was low. However, by 2 years, this  
9 was considerably higher. There was an increase in offering of CBT and family work in  
10 the comparator site from a very low base which had been due to a lack of fully trained  
11 therapists. This seems an area where implementation of the quality standards through  
12 a pathway process could be especially effective. Family intervention, carer and  
13 employment support were all offered to a greater extent in implementation site and  
14 uptake increased over the period. The findings also compare favourably with those of  
15 the National Clinical Audit of Psychosis<sup>21</sup>.  
16  
17  
18  
19  
20  
21  
22  
23  
24  
25  
26  
27  
28  
29  
30  
31  
32  
33  
34

35 The changes in teams were reflected in the results as numbers of patients accepted  
36 onto case load were much higher than expected in the comparator site but reduced to  
37 nearer expected levels during the project. Referrals increased substantially in  
38 implementation site but then plateaued after introduction of the pathway.  
39  
40  
41  
42  
43  
44  
45  
46

47 The introduction of the AWTS target brought increased funding for EIP nationally. In  
48 the implementation site the local service commissioners remained well engaged with  
49 the pathway implementation and resulting outcomes and this enabled positive contract  
50 discussions for future investment. A formal cost effectiveness analysis was not  
51 conducted due to limitations in data availability but the reduction in patients admitted  
52 to in-patients and the subsequent reduction in relapses to hospital suggest that the re-  
53  
54  
55  
56  
57  
58  
59  
60

1  
2  
3 introduction of the EIP teams and the implementation of the pathway could be  
4  
5 expected to have had a positive impact on cost in the implementation site.  
6  
7  
8  
9

## 10 **Study Limitations**

11  
12 This is an observational retrospective study based on manual audit of patients' medical  
13 records. Therefore, causality cannot be assumed. We took steps to maintain data  
14 consistency by having one dedicated member of staff involved in the data audit  
15 throughout, and by performing post-hoc data checks for consistency and outliers;  
16 however, data accuracy is naturally limited by the quality of mental health care  
17 providers' original record keeping. Additionally, missing data was common, for  
18 example only 237 (33%) of participants had a HoNoS score recorded at both referral  
19 and one year later allowing us to analyse the impact of their care on this endpoint; we  
20 cannot rule out the possibility of statistical bias caused by this.  
21  
22  
23  
24  
25  
26  
27  
28  
29  
30  
31  
32  
33  
34  
35  
36  
37  
38  
39

## 40 **Conclusion**

41 This comparison of the implementation of a quality standard based psychosis pathway  
42 with a comparator site which followed established guidelines for Early Intervention for  
43 Psychosis teams suggests that the former was more effective at improving the level  
44 of evidence-based practice offered to patients and their carers. Integrated care  
45 pathways can offer a platform to inform gaps in services, implement good clinical  
46 practice and measure the impact.  
47  
48  
49  
50  
51  
52  
53  
54  
55  
56  
57

## 58 **Competing interests**



1  
2  
3 The production of the pathway has been supported by the Wessex Academic Health  
4 Sciences Network (AHSN) and evaluation has also been supported by the Wessex  
5 Clinical Research Network (CRN). The views and opinions expressed therein are  
6 those of the authors and do not necessarily reflect those of funders, NIHR, NHS or the  
7 RCPsych, AHSN or CRN. The study is sponsored by Southern Health NHS  
8 Foundation Trust.  
9  
10  
11  
12  
13  
14  
15  
16  
17  
18

### 19 **Funding Statement**

20  
21 This project has been funded by the NHS England (Regional Innovation Fund  
22 programme); Small grant from the Royal College of Psychiatrists General Adult  
23 Psychiatry Faculty.  
24  
25  
26  
27  
28  
29

### 30 **Study Status**

31 The study is complete.  
32  
33  
34  
35  
36  
37  
38  
39  
40  
41  
42  
43  
44  
45  
46  
47  
48  
49  
50  
51  
52  
53  
54  
55  
56  
57  
58  
59  
60

## Authors' contributions

SR and DK are grant holders and contributed to the concept and design of the study. SR is the CI and led the development of the study protocol and study documentation and made a significant contribution to the manuscript. KT provided statistical expertise throughout the protocol development, data collection and analysis. CA provided PPI expertise throughout the protocol development and study delivery. AG supported the implementation of the TRlumPH development and delivery. EG, PP and TR supported the delivery of the study at their respective sites. All authors contributed to elaboration and refinement of the study protocol and approved the final manuscript.

## Data Availability

All data relevant to the study are included in the article or uploaded as supplementary information.

## Acknowledgements

We would like to thank everyone who has been involved at any stage of this study.

## Figure 1 Caption

TRlumPH Pathway

## References

1. World Health Organisation. *The World Health Report 2001. Mental Health: New Understanding. New Hope.* Geneva 2005.
2. Rössler W, Salize HJ, van Os J, Riecher-Rössler A. Size of burden of schizophrenia and psychotic disorders. *Eur Neuropsychopharmacol.* 2005;15(4):399-409.
3. Chang CK, Hayes RD, Perera G, Broadbent MT, Fernandes AC, Lee WE, et al. Life expectancy at birth for people with serious mental illness and other major disorders from a secondary mental health care case register in London. *PLoS One.* 2011; 6(5): e19590
4. Drake RJ, Haley CJ, Akhtar S, Lewis SW. Causes and consequences of duration of untreated psychosis in schizophrenia. *Br J Psychiatry.* 2000;177:511-515.
5. McGlashan TH. Duration of untreated psychosis in first-episode schizophrenia: marker or determinant of course? *Biol Psychiatry.* 1999;46(7):899-907.
6. Marshall M, Lewis S, Lockwood A, Drake R, Jones P, Croudace T. Association between duration of untreated psychosis and outcome in cohorts of first-episode patients: a systematic review. *Arch Gen Psychiatry.* 2005;62(9):975-983.
7. Penttilä M, Jääskeläinen E, Hirvonen N, Isohanni M, Miettunen J. Duration of untreated psychosis as predictor of long-term outcome in schizophrenia: systematic review and meta-analysis. *Br J Psychiatry.* 2014;205(2):88-94.
8. Department of H. *No health without mental health.* UK: Department of Health; 2011.
9. NHS England. Guidance to support the introduction of access and waiting time standards for mental health services in 2015/16. In. *NHS England.* London: NHS England; 2015.
10. NICE. Psychosis and schizophrenia in adults. Quality standard [QS80]. <https://www.nice.org.uk/guidance/qs80>. Published 2015. Accessed 31st May, 2019.
11. NHS England. Mental Health Task Force. Five year forward view. In. London: NHS England.; 2016.
12. Campbell H, Hotchkiss R, Bradshaw N, Porteous M. Integrated care pathways. *BMJ.* 1998;316(7125):133-137.
13. Excellence. NifHaSC. Stroke and Transient Ischaemic Attack. <https://www.nice.org.uk/guidance/conditions-and-diseases/cardiovascular-conditions/stroke-and-transient-ischaemic-attack>. Published 2019. Accessed.
14. Rathod S, Griffiths A, Kingdon D, Tiplady B, Jones T. Pathways to recovery: A case for adoption of systematic pathways in psychosis. In. London: Jointly produced by Imperial College Health Partners and Wessex Academic Health Science Network supported by the Royal College of Psychiatrists and Rethink Mental Illness; 2015.
15. Rathod S, Garner C, Griffiths A, et al. Protocol for a multicentre study to assess feasibility, acceptability, effectiveness and direct costs of TRIumPH (Treatment and Recovery In Psychosis): integrated care pathway for psychosis. *BMJ Open.* 2016;6(12):e012751.
16. Network WAHS. TRIumPH - Treatment and Recovery in Psychosis. <https://wessexahsn.org.uk/projects/59/triumph-treatment-and-recovery-in-psychosis>. Published 2015. Accessed.
17. Bergman, MM. Straw man of the Qualitative-Quantitative Divide. IN: Bergmann MM (ed.) *Advances in Mixed Methods Research.* London: Sage Publications; 2008
18. Preti A, Pisano A, Cascio MT, et al. Validation of the Health of the Nation Outcome Scales as a routine measure of outcome in early intervention programmes. *Early Interv Psychiatry.* 2012;6(4):423-431.
19. Braun V, Clarke V. Using thematic analysis in psychology. *Qualitative research in psychology.* 2006;3(2):77-101. Birchwood M, Connor C, Lester H, et al. Reducing

- 1  
2  
3 duration of untreated psychosis: care pathways to early intervention in psychosis  
4 services. *Br J Psychiatry*. 2013;203(1):58-64.  
5  
6 20. Birchwood M, Connor C, Lester H, et al. Reducing duration of untreated psychosis:  
7 care pathways to early intervention in psychosis services. *Br J Psychiatry*.  
8 2013;203(1):58-64.  
9  
10 21. Royal College of Psychiatrists. *Report of the National Audit of Schizophrenia (NAS)*  
11 2019. London: Royal College of Psychiatrists  
12 Healthcare Quality Improvement Partnership;2019.  
13  
14  
15  
16  
17  
18  
19  
20  
21  
22  
23  
24  
25  
26  
27  
28  
29  
30  
31  
32  
33  
34  
35  
36  
37  
38  
39  
40  
41  
42  
43  
44  
45  
46  
47  
48  
49  
50  
51  
52  
53  
54  
55  
56  
57  
58  
59  
60

For peer review only

Tables

**Table 1: Demographic information for all individuals referred to EIP service. Numbers represent either median (IQR) for continuous variables or proportions for categorical variables. Excludes EIP to EIP transfers.**

|                                                                 | Implementation site    |                        |                        | Comparator Site        |                        |                        |
|-----------------------------------------------------------------|------------------------|------------------------|------------------------|------------------------|------------------------|------------------------|
|                                                                 | Baseline<br>(n=123)    | Year 1<br>(n=416)      | Year 2<br>(n=463)      | Baseline<br>(n=237)    | Year 1<br>(n=271)      | Year 2<br>(n=252)      |
| Age (Years)                                                     | 22.4<br>(19.3 to 28.2) | 21.4<br>(19.0 to 26.1) | 21.6<br>(19.0 to 25.9) | 19.4<br>(16.7 to 24.9) | 19.7<br>(17.1 to 24.8) | 21.8<br>(17.9 to 30.3) |
| Gender:                                                         |                        |                        |                        |                        |                        |                        |
| <i>Female</i>                                                   | 35%                    | 40%                    | 39%                    | 43%                    | 40%                    | 38%                    |
| <i>Male</i>                                                     | 65%                    | 60%                    | 61%                    | 57%                    | 60%                    | 62%                    |
| Ethnicity:                                                      |                        |                        |                        |                        |                        |                        |
| <i>White</i>                                                    | 88%                    | 89%                    | 93%                    | 92%                    | 93%                    | 92%                    |
| <i>Black or Black British</i>                                   | 5%                     | 3%                     | 3%                     | 1%                     | 3%                     | 1%                     |
| <i>Asian or Asian British</i>                                   | 0%                     | 2%                     | 0%                     | 1%                     | 1%                     | 1%                     |
| <i>Mixed race</i>                                               | 3%                     | 3%                     | 2%                     | 3%                     | 1%                     | 4%                     |
| <i>Other</i>                                                    | 5%                     | 2%                     | 1%                     | 3%                     | 3%                     | 2%                     |
| Accommodation Status:                                           |                        |                        |                        |                        |                        |                        |
| <i>Accommodation with MH care support</i>                       | 3%                     | 1%                     | 0%                     | 0%                     | 2%                     | 0%                     |
| <i>Accommodation with other support</i>                         | 3%                     | 4%                     | 7%                     | 4%                     | 5%                     | 2%                     |
| <i>Acute/long stay healthcare residential facility/hospital</i> | 0%                     | 0%                     | 1%                     | 3%                     | 8%                     | 13%                    |
| <i>Homeless</i>                                                 | 7%                     | 9%                     | 13%                    | 10%                    | 8%                     | 7%                     |
| <i>Mainstream housing</i>                                       | 88%                    | 86%                    | 80%                    | 79%                    | 76%                    | 76%                    |
| <i>Bail/probation hostel</i>                                    | 0%                     | 0%                     | 0%                     | 2%                     | 0%                     | 0%                     |
| <i>Other</i>                                                    | 0%                     | 0%                     | 0%                     | 2%                     | 1%                     | 3%                     |
| Employment status:                                              |                        |                        |                        |                        |                        |                        |
| <i>Employed</i>                                                 | 38%                    | 20%                    | 29%                    | 24%                    | 26%                    | 20%                    |
| <i>Unemployed</i>                                               | 26%                    | 38%                    | 40%                    | 48%                    | 40%                    | 54%                    |
| <i>Homemaker</i>                                                | 1%                     | 2%                     | 1%                     | 4%                     | 3%                     | 1%                     |
| <i>Student</i>                                                  | 16%                    | 15%                    | 14%                    | 11%                    | 12%                    | 11%                    |
| <i>Long term sickness/disability benefit</i>                    | 15%                    | 16%                    | 12%                    | 9%                     | 5%                     | 5%                     |
| <i>Statutory sick pay</i>                                       | 0%                     | 3%                     | 0%                     | 5%                     | 9%                     | 3%                     |
| <i>Retired</i>                                                  | 0%                     | 0%                     | 0%                     | 0%                     | 0%                     | 1%                     |
| <i>Other</i>                                                    | 3%                     | 6%                     | 4%                     | 0%                     | 4%                     | 4%                     |
| Change in employment status during EIP:                         |                        |                        |                        |                        |                        |                        |
| <i>No reported change</i>                                       | 58 (84%)               | 107 (91%)              | 124 (100%)             | 128 (88%)              | 163 (97%)              | 88 (86%)               |
| <i>Became employed</i>                                          | 0 (0%)                 | 4 (3%)                 | 0 (0%)                 | 13 (9%)                | 2 (1%)                 | 5 (5%)                 |
| <i>Left employment/became unemployed</i>                        | 10 (14%)               | 4 (3%)                 | 0 (0%)                 | 4 (3%)                 | 2 (1%)                 | 3 (3%)                 |
| <i>Other</i>                                                    | 1 (1%)                 | 3 (3%)                 | 0 (0%)                 | 0 (0%)                 | 1 (1%)                 | 6 (6%)                 |
| Referral source:                                                |                        |                        |                        |                        |                        |                        |
| <i>Primary care</i>                                             | 75 (62%)               | 256 (63%)              | 283 (62%)              | 143 (60%)              | 172 (63%)              | 139 (55%)              |
| <i>Community mental health service</i>                          | 19 (16%)               | 66 (16%)               | 104 (23%)              | 14 (6%)                | 26 (10%)               | 14 (6%)                |
| <i>Inpatient mental health service</i>                          | 1 (1%)                 | 21 (5%)                | 15 (3%)                | 12 (5%)                | 16 (6%)                | 4 (2%)                 |
| <i>A&amp;E department</i>                                       | 11 (9%)                | 20 (5%)                | 21 (5%)                | 5 (2%)                 | 13 (5%)                | 23 (9%)                |
| <i>Physical healthcare service</i>                              | 0 (0%)                 | 13 (3%)                | 8 (2%)                 | 4 (2%)                 | 8 (3%)                 | 2 (1%)                 |
| <i>Caring and social services</i>                               | 0 (0%)                 | 0 (0%)                 | 5 (1%)                 | 10 (4%)                | 5 (2%)                 | 11 (4%)                |
| <i>Education service</i>                                        | 0 (0%)                 | 6 (1%)                 | 4 (1%)                 | 12 (5%)                | 7 (3%)                 | 8 (3%)                 |
| <i>Police/prison/probation</i>                                  | 9 (7%)                 | 8 (2%)                 | 11 (2%)                | 14 (6%)                | 11 (4%)                | 25 (10%)               |
| <i>Self-referral</i>                                            | 1 (1%)                 | 2 (0%)                 | 2 (0%)                 | 12 (5%)                | 6 (2%)                 | 17 (7%)                |
| <i>Other</i>                                                    | 5 (4%)                 | 16 (4%)                | 4 (1%)                 | 11 (5%)                | 8 (3%)                 | 9 (4%)                 |
| Central triage point (CTP):                                     |                        |                        |                        |                        |                        |                        |
| <i>EIP</i>                                                      | 22 (18%)               | 107 (26%)              | 120 (26%)              | 33 (14%)               | 24 (9%)                | 27 (11%)               |

|    |                                        |          |           |           |           |           |
|----|----------------------------------------|----------|-----------|-----------|-----------|-----------|
| 1  |                                        |          |           |           |           |           |
| 2  |                                        |          |           |           |           |           |
| 3  | <i>Community mental health service</i> | 98 (80%) | 281 (69%) | 325 (71%) | 183 (78%) | 217 (81%) |
| 4  | <i>Inpatient mental health service</i> | 2 (2%)   | 21 (5%)   | 14 (3%)   | 17 (7%)   | 26 (10%)  |
| 5  | <i>Physical healthcare service</i>     | 0 (0%)   | 1 (0%)    | 0 (0%)    | 0 (0%)    | 0 (0%)    |
| 6  | <i>Police/prison/probation</i>         | 0 (0%)   | 0 (0%)    | 0 (0%)    | 3 (1%)    | 2 (1%)    |
| 7  |                                        |          |           |           |           |           |
| 8  |                                        |          |           |           |           |           |
| 9  |                                        |          |           |           |           |           |
| 10 |                                        |          |           |           |           |           |
| 11 |                                        |          |           |           |           |           |
| 12 |                                        |          |           |           |           |           |
| 13 |                                        |          |           |           |           |           |
| 14 |                                        |          |           |           |           |           |
| 15 |                                        |          |           |           |           |           |
| 16 |                                        |          |           |           |           |           |
| 17 |                                        |          |           |           |           |           |
| 18 |                                        |          |           |           |           |           |
| 19 |                                        |          |           |           |           |           |
| 20 |                                        |          |           |           |           |           |
| 21 |                                        |          |           |           |           |           |
| 22 |                                        |          |           |           |           |           |
| 23 |                                        |          |           |           |           |           |
| 24 |                                        |          |           |           |           |           |
| 25 |                                        |          |           |           |           |           |
| 26 |                                        |          |           |           |           |           |
| 27 |                                        |          |           |           |           |           |
| 28 |                                        |          |           |           |           |           |
| 29 |                                        |          |           |           |           |           |
| 30 |                                        |          |           |           |           |           |
| 31 |                                        |          |           |           |           |           |
| 32 |                                        |          |           |           |           |           |
| 33 |                                        |          |           |           |           |           |
| 34 |                                        |          |           |           |           |           |
| 35 |                                        |          |           |           |           |           |
| 36 |                                        |          |           |           |           |           |
| 37 |                                        |          |           |           |           |           |
| 38 |                                        |          |           |           |           |           |
| 39 |                                        |          |           |           |           |           |
| 40 |                                        |          |           |           |           |           |
| 41 |                                        |          |           |           |           |           |
| 42 |                                        |          |           |           |           |           |
| 43 |                                        |          |           |           |           |           |
| 44 |                                        |          |           |           |           |           |
| 45 |                                        |          |           |           |           |           |
| 46 |                                        |          |           |           |           |           |
| 47 |                                        |          |           |           |           |           |
| 48 |                                        |          |           |           |           |           |
| 49 |                                        |          |           |           |           |           |
| 50 |                                        |          |           |           |           |           |
| 51 |                                        |          |           |           |           |           |
| 52 |                                        |          |           |           |           |           |
| 53 |                                        |          |           |           |           |           |
| 54 |                                        |          |           |           |           |           |
| 55 |                                        |          |           |           |           |           |
| 56 |                                        |          |           |           |           |           |
| 57 |                                        |          |           |           |           |           |
| 58 |                                        |          |           |           |           |           |
| 59 |                                        |          |           |           |           |           |
| 60 |                                        |          |           |           |           |           |

For peer review only

**Table 2: Process outcomes for all individuals referred to EIP service. Numbers represent either N (%) for categorical variables or median (IQR) for continuous variables. Excludes EIP to EIP transfers. P values for categorical comparisons from chi-squared test or Fisher's exact test as appropriate. P values for continuous data from Mann-Whitney U tests.**

|                                                                  | Implementation site    |                       |                       |                                             |                                             | Comparator site         |                        |                        |                                             |                                             |
|------------------------------------------------------------------|------------------------|-----------------------|-----------------------|---------------------------------------------|---------------------------------------------|-------------------------|------------------------|------------------------|---------------------------------------------|---------------------------------------------|
|                                                                  | Baseline<br>(n=123)    | Year One<br>(n=416)   | Year Two<br>(n=463)   | P value<br>Y1 vs baseline<br>Y2 vs baseline | P value<br>Y1 vs baseline<br>Y2 vs baseline | Baseline<br>(n=237)     | Year One<br>(n=271)    | Year Two<br>(n=252)    | P value<br>Y1 vs baseline<br>Y2 vs baseline | P value<br>Y1 vs baseline<br>Y2 vs baseline |
| Accepted onto EIP pathway                                        | 69 (56%)               | 118 (28%)             | 124 (27%)             | < 0.0001                                    | < 0.0001                                    | 145 (61%)               | 168 (62%)              | 102 (40%)              | 0.89                                        | < 0.0001                                    |
| Time from EIP referral to EIP assessment (in days)               | 11.0<br>(6.0 to 20.5)  | 6.0<br>(3.0 to 12.0)  | 7.0<br>(4.0 to 14.0)  | < 0.0001                                    | < 0.0001                                    | 7.0<br>(3.0 to 12.0)    | 7.0<br>(4.0 to 12.8)   | 12.0<br>(7.0 to 21.0)  | 0.24                                        | < 0.0001                                    |
| Time from CTP referral to EIP assessment (in days)               | 20.0<br>(11.8 to 55.3) | 15.0<br>(6.0 to 40.0) | 11.0<br>(6.0 to 23.0) | 0.0053                                      | < 0.0001                                    | 33.0<br>(11.0 to 142.5) | 24.0<br>(9.3 to 130.5) | 33.0<br>(13.0 to 98.0) | 0.45                                        | 0.96                                        |
| DNAs prior to assessment                                         |                        |                       |                       |                                             |                                             |                         |                        |                        |                                             |                                             |
| 0                                                                | 113 (92%)              | 378 (91%)             | 434 (94%)             |                                             | 0.37                                        | 211 (89%)               | 247 (91%)              | 232 (92%)              |                                             | 0.59                                        |
| 1                                                                | 7 (6%)                 | 28 (7%)               | 17 (4%)               |                                             |                                             | 17 (7%)                 | 19 (7%)                | 12 (5%)                |                                             |                                             |
| 2 or more                                                        | 3 (2%)                 | 10 (2%)               | 12 (3%)               |                                             |                                             | 9 (4%)                  | 6 (2%)                 | 9 (4%)                 |                                             |                                             |
| Time to allocation and engagement by care coordinator (in weeks) | 4.0<br>(0.0 to 11.0)   | 1.0<br>(0.0 to 5.0)   | 0.0<br>(0.0 to 3.0)   | 0.0033                                      | < 0.0001                                    | 0.0<br>(0.0 to 7.3)     | 0.0<br>(0.0 to 7.0)    | 0.0<br>(0.0 to 14.8)   | 0.054                                       | 0.48                                        |
| Time to multidisciplinary team (MDT) discussion (in weeks)       | 6.2<br>(1.7 to 20.0)   | 1.9<br>(1.0 to 4.6)   | 1.9<br>(0.9 to 3.0)   | < 0.0001                                    | < 0.0001                                    | 1.8<br>(0.7 to 3.0)     | 1.7<br>(1.0 to 2.7)    | 4.9<br>(1.8 to 28.0)   | 0.74                                        | < 0.0001                                    |
| Time to medical formulation (in weeks)                           | 4.7<br>(2.3 to 8.4)    | 3.9<br>(1.9 to 8.4)   | 3.3<br>(1.9 to 6.0)   | 0.45                                        | 0.11                                        | 6.5<br>(2.3 to 10.3)    | 6.7<br>(2.4 to 11.0)   | 8.3<br>(3.8 to 11.9)   | 0.99                                        | 0.14                                        |
| Time to CPA (care plan approach) / care plan (in weeks)          | 2.4<br>(0.0 to 6.9)    | 2.7<br>(0.8 to 5.4)   | 2.0<br>(0.4 to 5.8)   | 0.62                                        | 0.87                                        | 2.0<br>(0.7 to 5.6)     | 3.0<br>(1.0 to 14.5)   | 13.0<br>(4.3 to 34.0)  | 0.080                                       | < 0.0001                                    |
| Time to risk assessment completion (in weeks)                    | 50.3<br>(2.6 to 91.1)  | 6.4<br>(1.0 to 15.3)  | 4.7<br>(1.4 to 8.1)   | < 0.0001                                    | < 0.0001                                    | 5.3<br>(1.4 to 15.0)    | 3.6<br>(1.0 to 15.1)   | 4.6<br>(1.1 to 13.4)   | 0.38                                        | 0.60                                        |
| Reason for non-acceptance to EIP:                                |                        |                       |                       |                                             |                                             |                         |                        |                        |                                             |                                             |
| Does not fulfil EIP criteria                                     | 29 (71%)               | 202 (79%)             | 280 (85%)             |                                             | 0.0010                                      | 18 (20%)                | 20 (19%)               | 28 (19%)               |                                             | 0.76                                        |
| Discharged on professional advice                                | 4 (10%)                | 14 (5%)               | 2 (1%)                |                                             |                                             | 62 (67%)                | 65 (63%)               | 100 (66%)              |                                             |                                             |
| DNA/did not engage/declined treatment                            | 6 (15%)                | 27 (11%)              | 35 (11%)              |                                             |                                             | 5 (5%)                  | 8 (8%)                 | 13 (9%)                |                                             |                                             |
| Moved out of area                                                | 0 (0%)                 | 11 (4%)               | 10 (3%)               |                                             |                                             | 6 (7%)                  | 7 (7%)                 | 9 (6%)                 |                                             |                                             |

|                                                                       | Implementation site |            |            |                |                | Comparator site |           |          |                |                |
|-----------------------------------------------------------------------|---------------------|------------|------------|----------------|----------------|-----------------|-----------|----------|----------------|----------------|
|                                                                       | Baseline            | Year One   | Year Two   | P value        | P value        | Baseline        | Year One  | Year Two | P value        | P value        |
|                                                                       | (n=123)             | (n=416)    | (n=463)    | Y1 vs baseline | Y2 vs baseline | (n=237)         | (n=271)   | (n=252)  | Y1 vs baseline | Y2 vs baseline |
| <i>Other</i>                                                          | 2 (5%)              | 3 (1%)     | 4 (1%)     |                |                | 1 (1%)          | 4 (4%)    | 1 (1%)   |                |                |
| Reason for discharge from EIP after acceptance:                       |                     |            |            |                |                |                 |           |          |                |                |
| <i>Care completed</i>                                                 | 4 (15%)             | 4 (9%)     | 0 (0%)     | 0.076          |                | 0 (0%)          | 0 (0%)    | 0 (0%)   |                | 0.40           |
| <i>Does not fulfil EIP criteria</i>                                   | 8 (31%)             | 22 (48%)   | 22 (50%)   |                |                | 7 (6%)          | 6 (5%)    | 4 (9%)   |                |                |
| <i>Discharged on professional advice</i>                              | 0 (0%)              | 1 (2%)     | 3 (7%)     |                |                | 80 (72%)        | 72 (61%)  | 25 (54%) |                |                |
| <i>DNA/did not engage/declined treatment</i>                          | 6 (23%)             | 8 (17%)    | 8 (18%)    |                |                | 16 (14%)        | 25 (21%)  | 11 (24%) |                |                |
| <i>Moved out of area</i>                                              | 5 (19%)             | 11 (24%)   | 9 (20%)    |                |                | 7 (6%)          | 12 (10%)  | 5 (11%)  |                |                |
| <i>Other</i>                                                          | 3 (12%)             | 0 (0%)     | 2 (5%)     |                |                | 1 (1%)          | 4 (3%)    | 1 (2%)   |                |                |
| Change in accommodation status during EIP:                            |                     |            |            |                |                |                 |           |          |                |                |
| <i>No reported change</i>                                             | 63 (91%)            | 118 (100%) | 124 (100%) | <0.0001        |                | 136 (94%)       | 157 (93%) | 78 (76%) |                | <0.0001        |
| <i>Moved to mainstream housing</i>                                    | 0 (0%)              | 0 (0%)     | 0 (0%)     |                |                | 2 (1%)          | 3 (2%)    | 10 (10%) |                |                |
| <i>Moved from acute/long stay/hospital to supported accommodation</i> | 0 (0%)              | 0 (0%)     | 0 (0%)     |                |                | 1 (1%)          | 3 (2%)    | 2 (2%)   |                |                |
| <i>Moved to acute/long stay/hospital</i>                              | 1 (1%)              | 0 (0%)     | 0 (0%)     |                |                | 0 (0%)          | 1 (1%)    | 4 (4%)   |                |                |
| <i>Committed to bail/probation hostel/prison</i>                      | 0 (0%)              | 0 (0%)     | 0 (0%)     |                |                | 0 (0%)          | 0 (0%)    | 1 (1%)   |                |                |
| <i>No longer homeless</i>                                             | 1 (1%)              | 0 (0%)     | 0 (0%)     |                |                | 3 (2%)          | 2 (1%)    | 1 (1%)   |                |                |
| <i>Became homeless</i>                                                | 1 (1%)              | 0 (0%)     | 0 (0%)     |                |                | 1 (1%)          | 2 (1%)    | 1 (1%)   |                |                |
| <i>Other</i>                                                          | 3 (4%)              | 0 (0%)     | 0 (0%)     |                |                | 2 (1%)          | 0 (0%)    | 5 (5%)   |                |                |



**Table 3: Physical health assessments and interventions**

**N (%) individuals accepted onto the EIP pathway at each site who received listed physical health checks within 12 weeks, were offered interventions or took up interventions within 6 months of EIP referral. Excludes EIP to EIP transfers. P values from chi-squared test or Fisher's exact test as appropriate.**

|                                                       | Implementation site |                     |                     |         | Comparator Site     |                     |                     |         |
|-------------------------------------------------------|---------------------|---------------------|---------------------|---------|---------------------|---------------------|---------------------|---------|
|                                                       | Baseline<br>(n=69)  | Year One<br>(n=118) | Year Two<br>(n=124) | P value | Baseline<br>(n=145) | Year One<br>(n=168) | Year Two<br>(n=102) | P value |
| Physical health assessments received within 12 weeks: |                     |                     |                     |         |                     |                     |                     |         |
| <i>Physical Health (general)</i>                      | 33 (48%)            | 81 (69%)            | 86 (69%)            | 0.0038  | 38 (26%)            | 40 (24%)            | 44 (43%)            | 0.0019  |
| <i>Smoking</i>                                        | 23 (33%)            | 72 (61%)            | 76 (61%)            | 0.00033 | 38 (26%)            | 42 (25%)            | 34 (33%)            | 0.30    |
| <i>Substance Use</i>                                  | 35 (51%)            | 93 (79%)            | 98 (79%)            | <0.0001 | 71 (49%)            | 63 (38%)            | 66 (65%)            | <0.0001 |
| <i>Alcohol</i>                                        | 35 (51%)            | 89 (75%)            | 102 (82%)           | <0.0001 | 60 (41%)            | 60 (36%)            | 61 (60%)            | 0.00045 |
| <i>Weight</i>                                         | 17 (25%)            | 46 (39%)            | 60 (48%)            | 0.0065  | 46 (32%)            | 39 (23%)            | 39 (38%)            | 0.027   |
| <i>Waist</i>                                          | 4 (6%)              | 16 (14%)            | 27 (22%)            | 0.011   | 18 (12%)            | 9 (5%)              | 2 (2%)              | 0.0037  |
| <i>Pulse</i>                                          | 20 (29%)            | 48 (41%)            | 47 (38%)            | 0.30    | 25 (17%)            | 32 (19%)            | 33 (32%)            | 0.010   |
| <i>Blood Pressure</i>                                 | 22 (32%)            | 50 (42%)            | 55 (44%)            | 0.25    | 32 (22%)            | 38 (23%)            | 40 (39%)            | 0.0036  |
| <i>Bloods Taken</i>                                   | 18 (26%)            | 58 (49%)            | 50 (40%)            | 0.010   | 15 (10%)            | 25 (15%)            | 36 (35%)            | <0.0001 |
| <i>ECG</i>                                            | 10 (14%)            | 49 (42%)            | 27 (22%)            | <0.0001 | 17 (12%)            | 10 (6%)             | 30 (29%)            | <0.0001 |
| <i>NICE health check in 12 weeks</i>                  | 2 (3%)              | 9 (8%)              | 11 (9%)             | 0.30    | 1 (1%)              | 1 (1%)              | 1 (1%)              | 0.94    |
| Interventions offered at any time:                    |                     |                     |                     |         |                     |                     |                     |         |
| <i>Cognitive behaviour therapy</i>                    | 43 (62%)            | 68 (58%)            | 84 (68%)            | 0.26    | 1 (1%)              | 23 (14%)            | 22 (22%)            | <0.0001 |
| <i>Family intervention</i>                            | 36 (52%)            | 64 (54%)            | 80 (65%)            | 0.17    | 7 (5%)              | 7 (4%)              | 10 (10%)            | 0.13    |
| <i>Carer support</i>                                  | 50 (72%)            | 82 (69%)            | 90 (73%)            | 0.86    | 34 (23%)            | 29 (17%)            | 25 (25%)            | 0.26    |
| <i>Employment support</i>                             | 41 (59%)            | 47 (40%)            | 57 (46%)            | 0.043   | 37 (26%)            | 47 (28%)            | 18 (18%)            | 0.15    |
| Interventions taken up within 6 months:               |                     |                     |                     |         |                     |                     |                     |         |
| <i>Engagement</i>                                     | 52 (75%)            | 103 (87%)           | 111 (90%)           | 0.039   | 82 (57%)            | 74 (44%)            | 80 (79%)            | <0.0001 |
| <i>CBT for psychosis</i>                              | 3 (4%)              | 10 (8%)             | 8 (6%)              | 0.56    | 0 (0%)              | 7 (4%)              | 7 (7%)              | 0.010   |
| <i>Carer support</i>                                  | 24 (35%)            | 63 (53%)            | 84 (68%)            | <0.0001 | 17 (12%)            | 22 (13%)            | 16 (16%)            | 0.66    |
| <i>Medication</i>                                     | 37 (54%)            | 80 (68%)            | 91 (73%)            | 0.027   | 25 (17%)            | 37 (22%)            | 28 (28%)            | 0.16    |
| <i>Collaborative care planning</i>                    | 22 (32%)            | 85 (72%)            | 86 (69%)            | <0.0001 | 45 (31%)            | 38 (23%)            | 1 (1%)              | <0.0001 |
| <i>Physical Health</i>                                | 2 (3%)              | 4 (3%)              | 7 (6%)              | 0.58    | 37 (26%)            | 9 (5%)              | 15 (15%)            | <0.0001 |
| <i>Vocational</i>                                     | 14 (20%)            | 79 (67%)            | 89 (72%)            | <0.0001 | 29 (20%)            | 37 (22%)            | 39 (39%)            | 0.0023  |
| <i>Family work for psychosis</i>                      | 2 (3%)              | 11 (9%)             | 8 (6%)              | 0.25    | 2 (1%)              | 6 (4%)              | 1 (1%)              | 0.26    |
| <i>Any of these</i>                                   | 57 (83%)            | 113 (96%)           | 117 (94%)           | 0.0071  | 83 (57%)            | 74 (44%)            | 82 (81%)            | <0.0001 |

**Table 4: Acute care & clinical outcomes. Proportion of individuals accepted onto the EIP pathway at each trust experiencing acute care outcomes [n (%)] within 1 year of trust referral, and time to reach those outcomes where applicable [median (IQR)]. Excludes EIP to EIP transfers. P values for categorical comparisons from chi-squared test or Fisher's exact test as appropriate. P values for continuous data from Mann-Whitney U tests.**

|                                                                      | Implementation site    |                        |                       |                           | Comparator site           |                        |                        |                       |                           |                           |
|----------------------------------------------------------------------|------------------------|------------------------|-----------------------|---------------------------|---------------------------|------------------------|------------------------|-----------------------|---------------------------|---------------------------|
|                                                                      | Baseline<br>(n=69)     | Year One<br>(n=118)    | Year Two<br>(n=124)   | P value<br>Y1 vs baseline | P value<br>Y2 vs baseline | Baseline<br>(n=145)    | Year One<br>(n=168)    | Year Two<br>(n=102)   | P value<br>Y1 vs baseline | P value<br>Y2 vs baseline |
| Acute MH admission within 1 year of EIP referral                     | 27 (39%)               | 47 (40%)               | 36 (29%)              |                           | 0.16                      | 16 (11%)               | 21 (13%)               | 19 (19%)              |                           | 0.20                      |
| Time to acute admission<br>(where applicable) (weeks)                | 0.0<br>(0.0 to 10.0)   | 1.0<br>(0.0 to 7.0)    | 0.0<br>(0.0 to 3.5)   | 0.88                      | 0.11                      | 15.0<br>(3.0 to 41.0)  | 11.0<br>(2.0 to 41.0)  | 13.5<br>(3.0 to 34.0) | 0.82                      | 0.92                      |
| Time to acute MH/inpatient screening (hours)                         |                        |                        |                       |                           |                           |                        |                        |                       |                           |                           |
| 0 - 4                                                                | 21 (91%)               | 1 (100%)               | 14 (67%)              |                           | -                         | 11 (73%)               | 11 (58%)               | 8 (53%)               |                           | 0.49                      |
| 4 - 6                                                                | 0 (0%)                 | 0 (0%)                 | 6 (29%)               |                           |                           | 3 (20%)                | 4 (21%)                | 3 (20%)               |                           |                           |
| 6 - 8                                                                | 1 (4%)                 | 0 (0%)                 | 0 (0%)                |                           |                           | 0 (0%)                 | 2 (11%)                | 1 (7%)                |                           |                           |
| 8 - 10                                                               | 1 (4%)                 | 0 (0%)                 | 1 (5%)                |                           |                           | 1 (7%)                 | 2 (11%)                | 3 (20%)               |                           |                           |
| Time from acute admission to discharge<br>(where applicable) (weeks) | 4.5<br>(2.0 to 10.3)   | 4.0<br>(2.0 to 6.8)    | 3.0<br>(1.0 to 5.3)   | 0.42                      | 0.56                      | 3.0<br>(2.0 to 13.5)   | 3.0<br>(2.0 to 5.0)    | 3.0<br>(2.3 to 3.8)   | 0.56                      | 0.95                      |
| Number of subsequent acute admissions                                |                        |                        |                       |                           |                           |                        |                        |                       |                           |                           |
| None                                                                 | 18 (64%)               | 41 (85%)               | 25 (71%)              |                           | 0.091                     | 14 (67%)               | 15 (65%)               | 13 (62%)              |                           | 0.95                      |
| 1                                                                    | 6 (21%)                | 4 (8%)                 | 9 (26%)               |                           |                           | 5 (24%)                | 2 (9%)                 | 8 (38%)               |                           |                           |
| More than 1                                                          | 4 (14%)                | 3 (6%)                 | 1 (3%)                |                           |                           | 2 (10%)                | 6 (26%)                | 0 (0%)                |                           |                           |
| MHA section within 1 year of EIP referral                            | 25 (36%)               | 39 (33%)               | 34 (27%)              |                           | 0.58                      | 16 (11%)               | 21 (13%)               | 18 (18%)              |                           | 0.18                      |
| Contact acute MH services (post EIP)                                 | 32 (46%)               | 41 (35%)               | 37 (30%)              |                           | < 0.0001                  | 25 (17%)               | 30 (18%)               | 22 (22%)              |                           | < 0.0001                  |
| Crisis plan completed                                                | 35 (51%)               | 59 (50%)               | 44 (35%)              |                           | 0.032                     | 71 (49%)               | 69 (41%)               | 68 (67%)              |                           | 0.00023                   |
| Time to crisis plan completed (weeks)                                | 50.0<br>(15.0 to 79.0) | 22.5<br>(10.0 to 37.8) | 12.5<br>(6.0 to 22.8) | 0.0010                    | < 0.0001                  | 8.0<br>(1.0 to 23.0)   | 11.0<br>(1.0 to 39.0)  | 12.0<br>(2.0 to 34.3) | 0.36                      | 0.10                      |
| A&E attendance within 1 year of EIP referral                         | 7 (10%)                | 10 (8%)                | 11 (9%)               |                           | 0.91                      | 11 (8%)                | 12 (7%)                | 10 (10%)              |                           | 0.72                      |
| Time to A&E attendance (weeks)                                       | 21.0<br>(2.5 to 68.3)  | 8.5<br>(0.0 to 17.0)   | 13.0<br>(8.0 to 43.0) | 0.15                      | 0.88                      | 30.0<br>(25.0 to 41.0) | 44.0<br>(11.0 to 76.0) | 14.5<br>(7.3 to 31.5) | 0.87                      | 0.11                      |
| Reason for A&E attendance:                                           |                        |                        |                       |                           |                           |                        |                        |                       |                           |                           |

|                                                                   | Implementation site |          |          |                |                | Comparator site |          |          |                |                |
|-------------------------------------------------------------------|---------------------|----------|----------|----------------|----------------|-----------------|----------|----------|----------------|----------------|
|                                                                   | Baseline            | Year One | Year Two | P value        | P value        | Baseline        | Year One | Year Two | P value        | P value        |
|                                                                   | (n=69)              | (n=118)  | (n=124)  | Y1 vs baseline | Y2 vs baseline | (n=145)         | (n=168)  | (n=102)  | Y1 vs baseline | Y2 vs baseline |
| <i>Deterioration in mental state</i>                              | 7 (41%)             | 7 (50%)  | 5 (42%)  | -              | -              | 2 (15%)         | 4 (24%)  | 2 (20%)  | -              | -              |
| <i>Self harm/suicidal ideation/suicide attempt/overdose</i>       | 6 (35%)             | 5 (36%)  | 4 (33%)  | -              | -              | 10 (77%)        | 6 (35%)  | 4 (40%)  | -              | -              |
| <i>Alcohol/substance abuse</i>                                    | 1 (6%)              | 1 (7%)   | 2 (17%)  | -              | -              | 0 (0%)          | 1 (6%)   | 0 (0%)   | -              | -              |
| <i>Medication side effects</i>                                    | 0 (0%)              | 0 (0%)   | 0 (0%)   | -              | -              | 0 (0%)          | 1 (6%)   | 1 (10%)  | -              | -              |
| <i>Physical injury/illness (not apparently psychosis related)</i> | 3 (18%)             | 1 (7%)   | 1 (8%)   | -              | -              | 1 (8%)          | 5 (29%)  | 3 (30%)  | -              | -              |
| General hospital admission within 1 year of EIP referral          | 1 (1%)              | 4 (3%)   | 3 (2%)   | -              | -              | 2 (1%)          | 0 (0%)   | 4 (4%)   | -              | -              |
| Contact with criminal justice system whilst in EIP pathway        | 15 (22%)            | 34 (29%) | 4 (3%)   | < 0.0001       | < 0.0001       | 20 (14%)        | 20 (12%) | 21 (21%) | < 0.0001       | < 0.0001       |
| Criminal conviction within 1 year of EIP referral                 | 1 (1%)              | 0 (0%)   | 0 (0%)   | -              | -              | 4 (3%)          | 4 (2%)   | 1 (1%)   | -              | -              |
| Deaths within 1 year of EIP referral                              | 0 (0%)              | 0 (0%)   | 0 (0%)   | -              | -              | 0 (0%)          | 0 (0%)   | 1 (1%)   | -              | -              |

**Table 5: Clinical outcomes (HoNoS). Mean (SD) change in HoNoS scores from referral to one year at each trust for patients accepted onto EIP pathway. Excludes EIP to EIP transfers. P values from paired t-tests.**

|                                                                    | Implementation Site |                       |                       |                           |                           | Comparator Site    |                       |                       |                           |                           |
|--------------------------------------------------------------------|---------------------|-----------------------|-----------------------|---------------------------|---------------------------|--------------------|-----------------------|-----------------------|---------------------------|---------------------------|
|                                                                    | Baseline<br>(n=52)  | Year<br>One<br>(n=77) | Year<br>Two<br>(n=53) | P value<br>Y1 vs baseline | P value<br>Y2 vs baseline | Baseline<br>(n=28) | Year<br>One<br>(n=16) | Year<br>Two<br>(n=11) | P value<br>Y1 vs baseline | P value<br>Y2 vs baseline |
| Change in HoNoS scores (from referral to 1 year)                   |                     |                       |                       |                           |                           |                    |                       |                       |                           |                           |
| 1. <i>Overactive, aggressive, disruptive or agitated behaviour</i> | -0.56<br>(1.73)     | -0.43<br>(1.72)       | -0.69<br>(1.45)       | 0.59                      | 0.78                      | -0.43<br>(1.55)    | -1.06<br>(1.65)       | -0.09<br>(1.14)       | 0.21                      | 0.52                      |
| 2. <i>Non-accidental self injury</i>                               | -0.50<br>(1.38)     | -0.22<br>(1.26)       | -0.22<br>(1.15)       | 0.18                      | 0.21                      | -0.25<br>(0.84)    | -0.06<br>(1.29)       | -0.36<br>(1.43)       | 0.56                      | 0.76                      |
| 3. <i>Problem drinking or drug taking</i>                          | -0.40<br>(1.48)     | -0.15<br>(1.87)       | 0.04<br>(1.71)        | 0.30                      | 0.12                      | 0.14<br>(1.04)     | -0.31<br>(1.20)       | -0.10<br>(1.52)       | 0.19                      | 0.58                      |
| 4. <i>Cognitive problems</i>                                       | -0.27<br>(1.34)     | -0.15<br>(1.32)       | -0.06<br>(1.32)       | 0.48                      | 0.33                      | -0.29<br>(1.18)    | -0.38<br>(0.96)       | -0.50<br>(1.51)       | 0.80                      | 0.65                      |
| 5. <i>Physical illness or disability problems</i>                  | -0.23<br>(1.10)     | 0.03<br>(1.35)        | 0.02<br>(1.08)        | 0.19                      | 0.17                      | 0.11<br>(0.50)     | -0.38<br>(1.02)       | 0.45<br>(1.44)        | 0.041                     | 0.26                      |
| 6. <i>Problems associated with hallucinations and delusions</i>    | -0.56<br>(1.62)     | -0.71<br>(1.70)       | -0.11<br>(1.51)       | 0.74                      | 0.14                      | -0.86<br>(1.46)    | -1.81<br>(1.42)       | -0.91<br>(1.76)       | 0.041                     | 0.93                      |
| 7. <i>Problems with depressed mood</i>                             | -0.50<br>(1.59)     | -0.19<br>(1.49)       | -0.55<br>(1.12)       | 0.24                      | 0.94                      | -0.46<br>(1.29)    | -0.88<br>(1.41)       | -0.55<br>(1.21)       | 0.33                      | 0.86                      |
| 8. <i>Other mental and behavioural problems</i>                    | -0.45<br>(1.53)     | -0.73<br>(1.81)       | -0.27<br>(1.49)       | 0.58                      | 0.68                      | -0.61<br>(1.26)    | -0.75<br>(1.98)       | -0.36<br>(1.69)       | 0.77                      | 0.62                      |
| 9. <i>Problems with relationships</i>                              | -0.83<br>(1.32)     | -0.41<br>(1.51)       | -0.20<br>(1.25)       | 0.07                      | 0.013                     | -0.21<br>(1.26)    | -1.00<br>(1.41)       | -0.10<br>(0.57)       | 0.064                     | 0.78                      |
| 10. <i>Problems with activities of daily living</i>                | -0.33<br>(1.57)     | -0.32<br>(1.55)       | -0.46<br>(1.47)       | 0.85                      | 0.68                      | -0.64<br>(1.16)    | -1.00<br>(1.55)       | 0.18<br>(0.75)        | 0.39                      | 0.04                      |
| 11. <i>Problems with living conditions</i>                         | -0.20<br>(1.51)     | -0.33<br>(1.44)       | 0.08<br>(1.21)        | 0.69                      | 0.28                      | -0.36<br>(1.31)    | -0.69<br>(1.20)       | 0.45<br>(1.13)        | 0.41                      | 0.079                     |
| 12. <i>Problems with occupation and activities</i>                 | -0.33<br>(1.64)     | -0.19<br>(1.47)       | 0.30<br>(1.45)        | 0.54                      | 0.037                     | -0.25<br>(1.58)    | -1.06<br>(1.57)       | -0.09<br>(1.45)       | 0.11                      | 0.77                      |

***TRIumPH: Treatment and Recovery In Psychosis***

---

1  
2  
3  
4  
5  
6  
7  
8  
9  
10  
11  
12  
13  
14  
15  
16  
17  
18  
19  
20  
21  
22  
23  
24  
25  
26  
27  
28  
29  
30  
31  
32  
33  
34  
35  
36  
37  
38  
39  
40  
41  
42  
43  
44  
45  
46  
47  
48  
49  
50  
51  
52  
53  
54  
55  
56  
57  
58  
59  
60

For peer review only

# Routine Referral

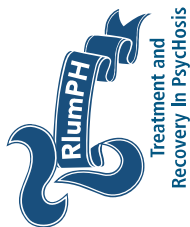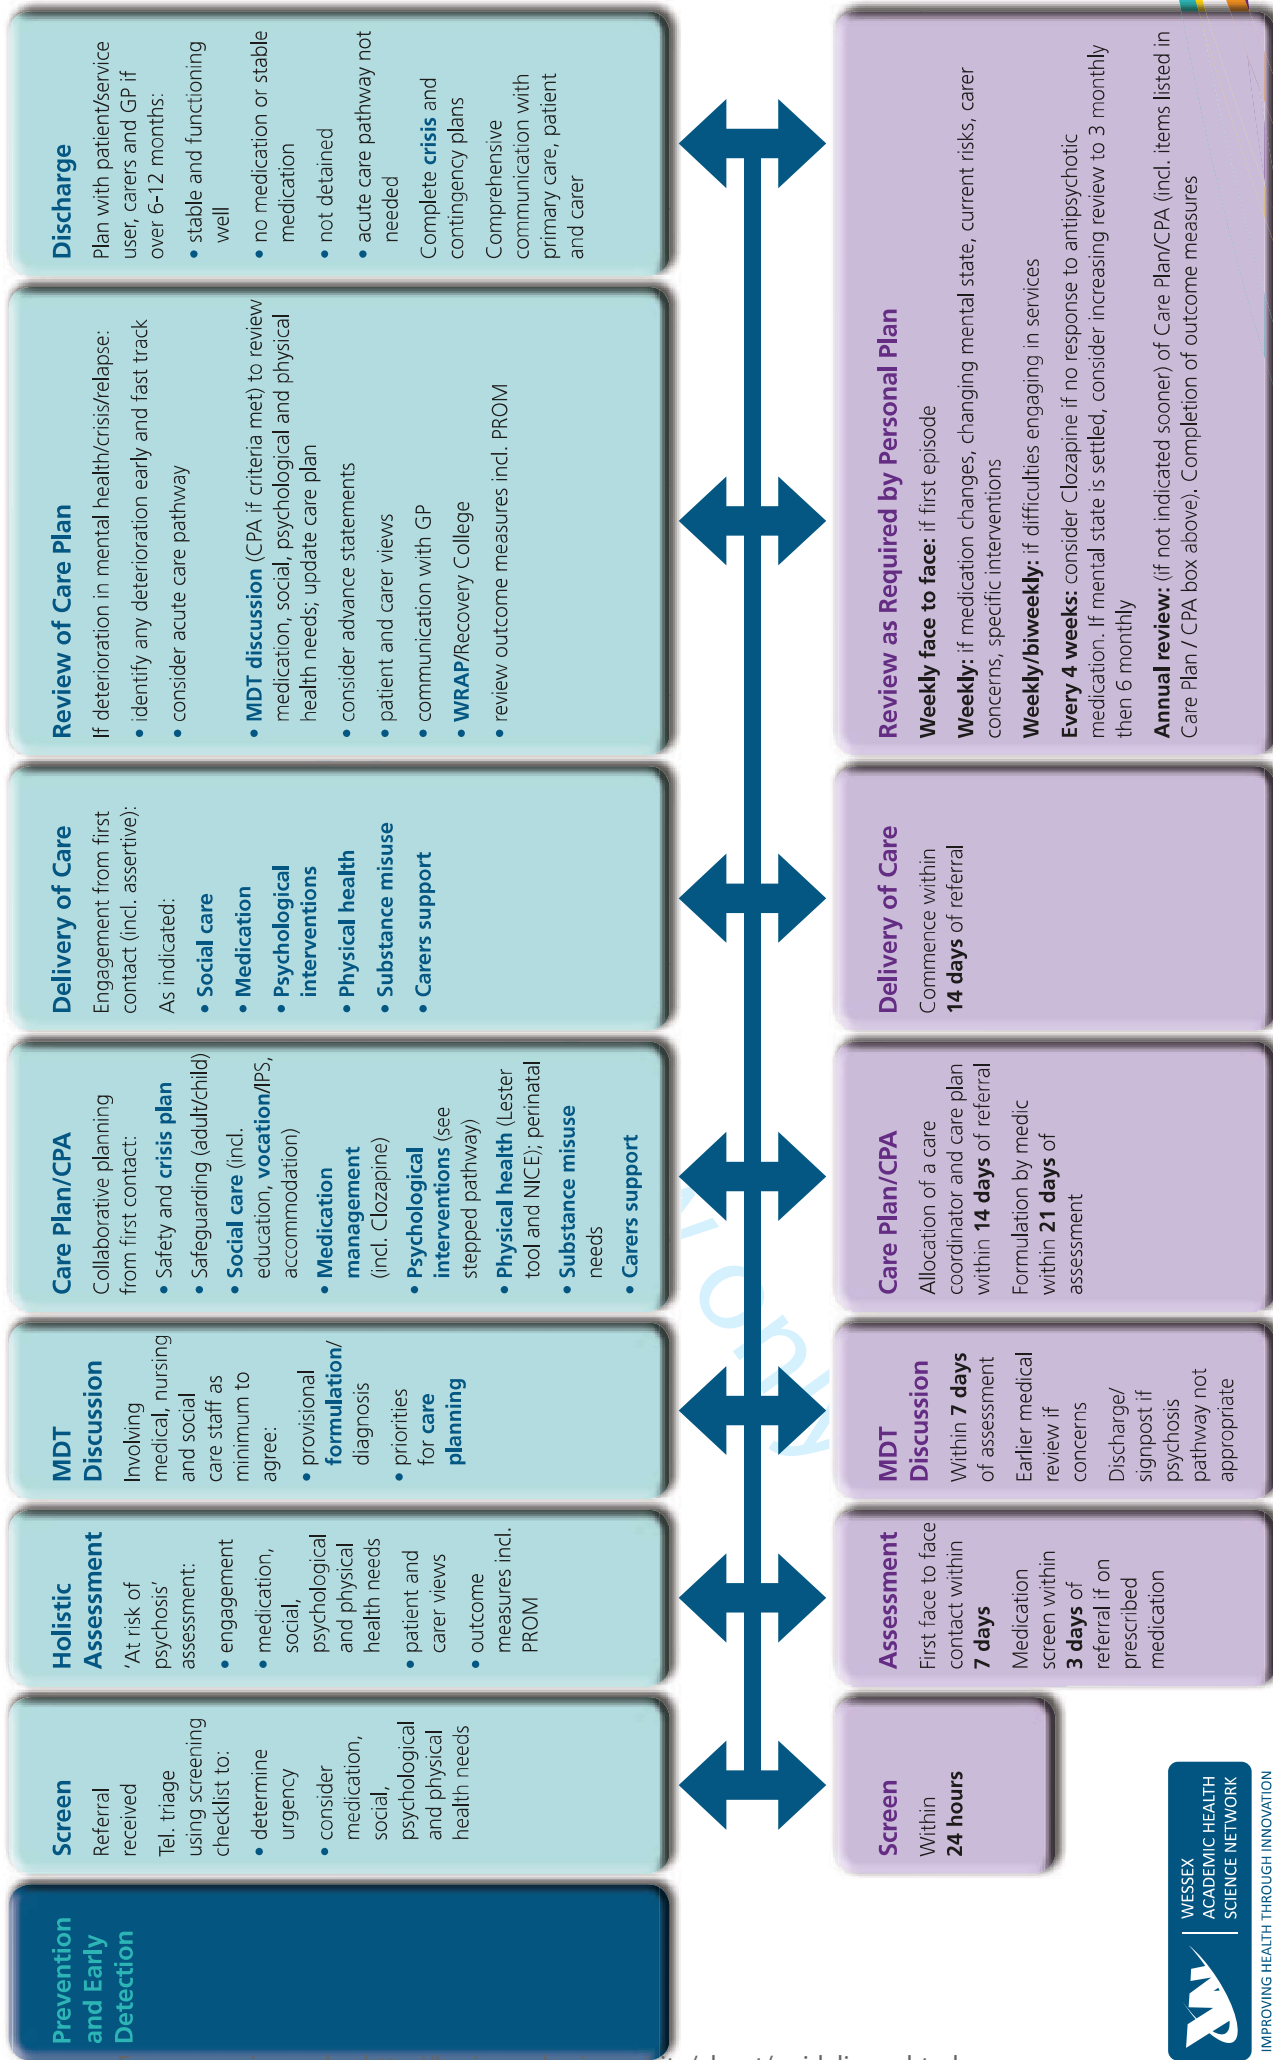

**Table 1: Staff survey results**  
Section A: Demographics

|                                   | Intervention arm    |                   |                   | Control arm         |                   |                   |
|-----------------------------------|---------------------|-------------------|-------------------|---------------------|-------------------|-------------------|
|                                   | Baseline<br>(n=438) | Year 1<br>(n=412) | Year 2<br>(n=418) | Baseline<br>(n=122) | Year 1<br>(n=155) | Year 2<br>(n=135) |
| Type of team                      |                     |                   |                   |                     |                   |                   |
| CMHT                              | 39%                 | 32%               | 30%               | 51%                 | 46%               | 49%               |
| EIP                               | 7%                  | 10%               | 8%                | 7%                  | 5%                | 9%                |
| Psychology                        | 5%                  | 6%                | 8%                | 2%                  | 1%                | 2%                |
| Inpatient                         | 35%                 | 42%               | 42%               | 30%                 | 35%               | 27%               |
| Hospital at home                  | 8%                  | 6%                | 8%                | 4%                  | 8%                | 7%                |
| Other (inc. AAT/AOT)              | 13%                 | 7%                | 8%                | 10%                 | 8%                | 9%                |
| Job role                          |                     |                   |                   |                     |                   |                   |
| Psychiatrist/SpR/SHO              | 15%                 | 7%                | 10%               | 5%                  | 6%                | 10%               |
| Psychologist/Psychotherapist      | 7%                  | 6%                | 8%                | 6%                  | 1%                | 2%                |
| Nurse practitioner                | 42%                 | 41%               | 39%               | 39%                 | 43%               | 34%               |
| Occupational therapist            | 4%                  | 6%                | 5%                | 7%                  | 8%                | 7%                |
| Social worker                     | 7%                  | 5%                | 5%                | 8%                  | 5%                | 8%                |
| Mental health care support worker | 19%                 | 25%               | 23%               | 20%                 | 22%               | 16%               |
| Other                             | 8%                  | 10%               | 10%               | 16%                 | 15%               | 22%               |
| Geographical area of living       |                     |                   |                   |                     |                   |                   |
| North Hampshire                   | 7%                  | 6%                | 11%               | 22%                 | 35%               | 24%               |
| West Hampshire                    | 24%                 | 23%               | 18%               | 20%                 | 11%               | 27%               |
| East Hampshire                    | 32%                 | 23%               | 21%               | 48%                 | 54%               | 47%               |
| Southampton                       | 36%                 | 43%               | 50%               | 8%                  | 0%                | 1%                |
| Unknown/other                     | 1%                  | 5%                | 0%                | 2%                  | 0%                | 0%                |
| Gender                            |                     |                   |                   |                     |                   |                   |
| Male                              | 32%                 | 33%               | 32%               | 31%                 | 39%               | 36%               |
| Female                            | 67%                 | 66%               | 67%               | 68%                 | 61%               | 64%               |
| Other                             | 0%                  | 0%                | <1%               | 0%                  | 0%                | 0%                |
| Not answered                      | 1%                  | 2%                | 1%                | 1%                  | 0%                | 0%                |
| Age group                         |                     |                   |                   |                     |                   |                   |
| Under 24                          | 5%                  | 5%                | 6%                | 6%                  | 5%                | 3%                |
| 25-34                             | 26%                 | 23%               | 25%               | 17%                 | 21%               | 24%               |
| 35-44                             | 30%                 | 28%               | 30%               | 29%                 | 21%               | 25%               |
| 45-54                             | 28%                 | 28%               | 27%               | 39%                 | 34%               | 36%               |
| 55-64                             | 9%                  | 14%               | 11%               | 8%                  | 17%               | 11%               |
| 65 or over                        | 1%                  | 1%                | 1%                | 0%                  | 1%                | 1%                |
| Not answered                      | 1%                  | 1%                | <1%               | 1%                  | 1%                | 0%                |
| Ethnicity                         |                     |                   |                   |                     |                   |                   |
| White                             | 82%                 | 80%               | 83%               | 92%                 | 94%               | 90%               |

|            | Intervention arm |                |                | Control arm      |                |                |
|------------|------------------|----------------|----------------|------------------|----------------|----------------|
|            | Baseline (n=438) | Year 1 (n=412) | Year 2 (n=418) | Baseline (n=122) | Year 1 (n=155) | Year 2 (n=135) |
| Mixed race | 4%               | 5%             | 5%             | 2%               | 3%             | 3%             |
| Asian      | 6%               | 5%             | 5%             | 1%               | 1%             | 3%             |
| Black      | 5%               | 9%             | 6%             | 3%               | 1%             | 1%             |
| Other      | 1%               | 1%             | 1%             | 0%               | 1%             | 1%             |
| Not stated | <1%              | 1%             | 1%             | 1%               | 0%             | 1%             |

Section B: Experience

|                                                                                                             | Intervention arm |                |                | Control arm      |                |                |
|-------------------------------------------------------------------------------------------------------------|------------------|----------------|----------------|------------------|----------------|----------------|
|                                                                                                             | Baseline (n=438) | Year 1 (n=412) | Year 2 (n=418) | Baseline (n=122) | Year 1 (n=155) | Year 2 (n=135) |
| I have been able to support people with FEP to have more control in their lives:                            |                  |                |                |                  |                |                |
| Always                                                                                                      | 16%              | 15%            | 18%            | 24%              | 15%            | 16%            |
| Sometimes                                                                                                   | 62%              | 50%            | 54%            | 60%              | 55%            | 55%            |
| Rarely                                                                                                      | 13%              | 14%            | 13%            | 8%               | 12%            | 10%            |
| Never                                                                                                       | 5%               | 9%             | 6%             | 3%               | 9%             | 6%             |
| Don't know                                                                                                  | 3%               | 7%             | 6%             | 2%               | 6%             | 11%            |
| Not answered                                                                                                | 2%               | 5%             | 3%             | 3%               | 2%             | 2%             |
| I have been able to support people with FEP to manage their physical, mental and social needs holistically: |                  |                |                |                  |                |                |
| Always                                                                                                      | 24%              | 27%            | 27%            | 25%              | 22%            | 22%            |
| Sometimes                                                                                                   | 58%              | 47%            | 49%            | 63%              | 57%            | 54%            |
| Rarely                                                                                                      | 9%               | 8%             | 10%            | 3%               | 6%             | 7%             |
| Never                                                                                                       | 3%               | 7%             | 5%             | 3%               | 8%             | 5%             |
| Don't know                                                                                                  | 2%               | 8%             | 6%             | 0%               | 6%             | 9%             |
| Not answered                                                                                                | 3%               | 5%             | 3%             | 5%               | 2%             | 3%             |
| I have been able to support people with FEP to involve carers:                                              |                  |                |                |                  |                |                |
| Always                                                                                                      | 29%              | 25%            | 27%            | 30%              | 31%            | 31%            |
| Sometimes                                                                                                   | 52%              | 43%            | 43%            | 60%              | 48%            | 47%            |
| Rarely                                                                                                      | 9%               | 11%            | 12%            | 4%               | 8%             | 8%             |
| Never                                                                                                       | 4%               | 8%             | 6%             | 2%               | 7%             | 4%             |
| Don't know                                                                                                  | 2%               | 8%             | 9%             | 1%               | 5%             | 7%             |
| Not answered                                                                                                | 3%               | 5%             | 4%             | 4%               | 1%             | 3%             |
| I feel appropriately trained and supervised to deliver psychological informed interventions:                |                  |                |                |                  |                |                |
| Always                                                                                                      | 22%              | 21%            | 21%            | 16%              | 12%            | 19%            |
| Sometimes                                                                                                   | 47%              | 40%            | 38%            | 52%              | 42%            | 45%            |
| Rarely                                                                                                      | 15%              | 14%            | 11%            | 11%              | 19%            | 11%            |
| Never                                                                                                       | 7%               | 10%            | 8%             | 13%              | 7%             | 6%             |
| Don't know                                                                                                  | 5%               | 11%            | 10%            | 4%               | 8%             | 10%            |
| Not answered                                                                                                | 4%               | 5%             | 13%            | 3%               | 1%             | 9%             |
| I feel appropriately trained and supervised to deliver physical health assessment and intervention:         |                  |                |                |                  |                |                |



|                                                                                                       | Intervention arm    |                   |                   | Control arm         |                   |                   |
|-------------------------------------------------------------------------------------------------------|---------------------|-------------------|-------------------|---------------------|-------------------|-------------------|
|                                                                                                       | Baseline<br>(n=438) | Year 1<br>(n=412) | Year 2<br>(n=418) | Baseline<br>(n=122) | Year 1<br>(n=155) | Year 2<br>(n=135) |
| <i>Always</i>                                                                                         | 34%                 | 34%               | 29%               | 27%                 | 34%               | 37%               |
| <i>Sometimes</i>                                                                                      | 41%                 | 34%               | 39%               | 42%                 | 41%               | 33%               |
| <i>Rarely</i>                                                                                         | 12%                 | 10%               | 9%                | 14%                 | 10%               | 12%               |
| <i>Never</i>                                                                                          | 10%                 | 9%                | 8%                | 14%                 | 9%                | 7%                |
| <i>Don't know</i>                                                                                     | 3%                  | 8%                | 9%                | 2%                  | 3%                | 8%                |
| <i>Not answered</i>                                                                                   | 2%                  | 5%                | 6%                | 1%                  | 4%                | 3%                |
| I feel appropriately trained and supervised to deliver vocational support:                            |                     |                   |                   |                     |                   |                   |
| <i>Always</i>                                                                                         | 16%                 | 20%               | 15%               | 17%                 | 13%               | 19%               |
| <i>Sometimes</i>                                                                                      | 49%                 | 42%               | 44%               | 55%                 | 54%               | 51%               |
| <i>Rarely</i>                                                                                         | 23%                 | 16%               | 17%               | 19%                 | 21%               | 10%               |
| <i>Never</i>                                                                                          | 6%                  | 9%                | 9%                | 5%                  | 3%                | 7%                |
| <i>Don't know</i>                                                                                     | 4%                  | 10%               | 9%                | 3%                  | 5%                | 10%               |
| <i>Not answered</i>                                                                                   | 2%                  | 4%                | 6%                | 1%                  | 5%                | 3%                |
| I feel appropriately trained and supervised to deliver alcohol, smoking and substance misuse support: |                     |                   |                   |                     |                   |                   |
| <i>Always</i>                                                                                         | 22%                 | 22%               | 23%               | 30%                 | 22%               | 29%               |
| <i>Sometimes</i>                                                                                      | 58%                 | 46%               | 49%               | 50%                 | 58%               | 48%               |
| <i>Rarely</i>                                                                                         | 12%                 | 14%               | 11%               | 14%                 | 10%               | 10%               |
| <i>Never</i>                                                                                          | 5%                  | 5%                | 5%                | 5%                  | 4%                | 4%                |
| <i>Don't know</i>                                                                                     | 2%                  | 9%                | 9%                | 1%                  | 1%                | 7%                |
| <i>Not answered</i>                                                                                   | 1%                  | 4%                | 4%                | 1%                  | 5%                | 3%                |
| I believe service users and carers are involved in planning their care:                               |                     |                   |                   |                     |                   |                   |
| <i>Always</i>                                                                                         | 46%                 | 47%               | 45%               | 48%                 | 38%               | 47%               |
| <i>Sometimes</i>                                                                                      | 47%                 | 46%               | 47%               | 52%                 | 41%               | 52%               |
| <i>Rarely</i>                                                                                         | 4%                  | 2%                | 3%                | 1%                  | 4%                | 1%                |
| <i>Never</i>                                                                                          | 0%                  | 0%                | 1%                | 0%                  | 0%                | 0%                |
| <i>Don't know</i>                                                                                     | 1%                  | 3%                | 2%                | 0%                  | 2%                | 0%                |
| <i>Not answered</i>                                                                                   | 2%                  | 2%                | 2%                | 0%                  | 15%               | 1%                |
| I feel supported to carry out holistic assessment and care plans:                                     |                     |                   |                   |                     |                   |                   |
| <i>Always</i>                                                                                         | 44%                 | 42%               | 43%               | 46%                 | 47%               | 40%               |
| <i>Sometimes</i>                                                                                      | 39%                 | 36%               | 34%               | 43%                 | 34%               | 44%               |
| <i>Rarely</i>                                                                                         | 5%                  | 6%                | 4%                | 3%                  | 8%                | 5%                |
| <i>Never</i>                                                                                          | 3%                  | 5%                | 5%                | 4%                  | 2%                | 1%                |
| <i>Don't know</i>                                                                                     | 3%                  | 6%                | 8%                | 2%                  | 5%                | 5%                |
| <i>Not answered</i>                                                                                   | 6%                  | 5%                | 6%                | 2%                  | 5%                | 4%                |

1  
2  
3  
4  
5  
6  
7  
8  
9  
10  
11  
12  
13  
14  
15  
16  
17  
18  
19  
20  
21  
22  
23  
24  
25  
26  
27  
28  
29  
30  
31  
32  
33  
34  
35  
36  
37  
38  
39  
40  
41  
42  
43  
44  
45  
46  
47  
48  
49  
50  
51  
52  
53  
54  
55  
56  
57  
58  
59  
60

## STROBE Statement—checklist of items that should be included in reports of observational studies

|                           | Item No | Recommendation                                                                                                                                                                                                                                                                                                                                                                                                                                                         | Page No         |
|---------------------------|---------|------------------------------------------------------------------------------------------------------------------------------------------------------------------------------------------------------------------------------------------------------------------------------------------------------------------------------------------------------------------------------------------------------------------------------------------------------------------------|-----------------|
| <b>Title and abstract</b> | 1       | (a) Indicate the study's design with a commonly used term in the title or the abstract                                                                                                                                                                                                                                                                                                                                                                                 | 1               |
|                           |         | (b) Provide in the abstract an informative and balanced summary of what was done and what was found                                                                                                                                                                                                                                                                                                                                                                    | 2               |
| <b>Introduction</b>       |         |                                                                                                                                                                                                                                                                                                                                                                                                                                                                        |                 |
| Background/rationale      | 2       | Explain the scientific background and rationale for the investigation being reported                                                                                                                                                                                                                                                                                                                                                                                   | 4               |
| Objectives                | 3       | State specific objectives, including any prespecified hypotheses                                                                                                                                                                                                                                                                                                                                                                                                       | 6               |
| <b>Methods</b>            |         |                                                                                                                                                                                                                                                                                                                                                                                                                                                                        |                 |
| Study design              | 4       | Present key elements of study design early in the paper                                                                                                                                                                                                                                                                                                                                                                                                                | 6               |
| Setting                   | 5       | Describe the setting, locations, and relevant dates, including periods of recruitment, exposure, follow-up, and data collection                                                                                                                                                                                                                                                                                                                                        | 6               |
| Participants              | 6       | (a) <i>Cohort study</i> —Give the eligibility criteria, and the sources and methods of selection of participants. Describe methods of follow-up<br><i>Case-control study</i> —Give the eligibility criteria, and the sources and methods of case ascertainment and control selection. Give the rationale for the choice of cases and controls<br><i>Cross-sectional study</i> —Give the eligibility criteria, and the sources and methods of selection of participants | 7/8             |
|                           |         | (b) <i>Cohort study</i> —For matched studies, give matching criteria and number of exposed and unexposed<br><i>Case-control study</i> —For matched studies, give matching criteria and the number of controls per case                                                                                                                                                                                                                                                 |                 |
| Variables                 | 7       | Clearly define all outcomes, exposures, predictors, potential confounders, and effect modifiers. Give diagnostic criteria, if applicable                                                                                                                                                                                                                                                                                                                               | 8               |
| Data sources/measurement  | 8*      | For each variable of interest, give sources of data and details of methods of assessment (measurement). Describe comparability of assessment methods if there is more than one group                                                                                                                                                                                                                                                                                   | NA <sup>+</sup> |
| Bias                      | 9       | Describe any efforts to address potential sources of bias                                                                                                                                                                                                                                                                                                                                                                                                              | 17-19           |
| Study size                | 10      | Explain how the study size was arrived at                                                                                                                                                                                                                                                                                                                                                                                                                              | 8               |
| Quantitative variables    | 11      | Explain how quantitative variables were handled in the analyses. If applicable, describe which groupings were chosen and why                                                                                                                                                                                                                                                                                                                                           | 9               |
| Statistical methods       | 12      | (a) Describe all statistical methods, including those used to control for confounding                                                                                                                                                                                                                                                                                                                                                                                  | 9               |
|                           |         | (b) Describe any methods used to examine subgroups and interactions                                                                                                                                                                                                                                                                                                                                                                                                    | 9               |
|                           |         | (c) Explain how missing data were addressed                                                                                                                                                                                                                                                                                                                                                                                                                            | 9               |
|                           |         | (d) <i>Cohort study</i> —If applicable, explain how loss to follow-up was addressed<br><i>Case-control study</i> —If applicable, explain how matching of cases and controls was addressed<br><i>Cross-sectional study</i> —If applicable, describe analytical methods taking account of sampling strategy                                                                                                                                                              | 9               |
|                           |         | (e) Describe any sensitivity analyses                                                                                                                                                                                                                                                                                                                                                                                                                                  |                 |

| <b>Results</b>           |     |                                                                                                                                                                                                                                                                                                                                                                                                               |                 |
|--------------------------|-----|---------------------------------------------------------------------------------------------------------------------------------------------------------------------------------------------------------------------------------------------------------------------------------------------------------------------------------------------------------------------------------------------------------------|-----------------|
| Participants             | 13* | (a) Report numbers of individuals at each stage of study—eg numbers potentially eligible, examined for eligibility, confirmed eligible, included in the study, completing follow-up, and analysed<br>(b) Give reasons for non-participation at each stage<br>(c) Consider use of a flow diagram                                                                                                               | Table 1         |
| Descriptive data         | 14* | (a) Give characteristics of study participants (eg demographic, clinical, social) and information on exposures and potential confounders<br>(b) Indicate number of participants with missing data for each variable of interest<br>(c) <i>Cohort study</i> —Summarise follow-up time (eg, average and total amount)                                                                                           | Table 1         |
| Outcome data             | 15* | <i>Cohort study</i> —Report numbers of outcome events or summary measures over time<br><i>Case-control study</i> —Report numbers in each exposure category, or summary measures of exposure<br><i>Cross-sectional study</i> —Report numbers of outcome events or summary measures                                                                                                                             | Tables          |
| Main results             | 16  | (a) Give unadjusted estimates and, if applicable, confounder-adjusted estimates and their precision (eg, 95% confidence interval). Make clear which confounders were adjusted for and why they were included<br>(b) Report category boundaries when continuous variables were categorized<br>(c) If relevant, consider translating estimates of relative risk into absolute risk for a meaningful time period | Tables          |
| Other analyses           | 17  | Report other analyses done—eg analyses of subgroups and interactions, and sensitivity analyses                                                                                                                                                                                                                                                                                                                | Tables<br>Pg 10 |
| <b>Discussion</b>        |     |                                                                                                                                                                                                                                                                                                                                                                                                               |                 |
| Key results              | 18  | Summarise key results with reference to study objectives                                                                                                                                                                                                                                                                                                                                                      | 19              |
| Limitations              | 19  | Discuss limitations of the study, taking into account sources of potential bias or imprecision. Discuss both direction and magnitude of any potential bias                                                                                                                                                                                                                                                    | 19              |
| Interpretation           | 20  | Give a cautious overall interpretation of results considering objectives, limitations, multiplicity of analyses, results from similar studies, and other relevant evidence                                                                                                                                                                                                                                    | 17              |
| Generalisability         | 21  | Discuss the generalisability (external validity) of the study results                                                                                                                                                                                                                                                                                                                                         | 19              |
| <b>Other information</b> |     |                                                                                                                                                                                                                                                                                                                                                                                                               |                 |
| Funding                  | 22  | Give the source of funding and the role of the funders for the present study and, if applicable, for the original study on which the present article is based                                                                                                                                                                                                                                                 | 19              |

\*Give information separately for cases and controls in case-control studies and, if applicable, for exposed and unexposed groups in cohort and cross-sectional studies.

**Note:** An Explanation and Elaboration article discusses each checklist item and gives methodological background and published examples of transparent reporting. The STROBE checklist is best used in conjunction with this article (freely available on the Web sites of PLoS Medicine at <http://www.plosmedicine.org/>, Annals of Internal Medicine at <http://www.annals.org/>, and Epidemiology at <http://www.epidem.com/>). Information on the STROBE Initiative is available at [www.strobe-statement.org](http://www.strobe-statement.org).

+ Not possible as data collected from various sources across intervention and comparator site (depending on how information collected by services in real world setting). Data dictionary produced for researchers to allow for this.

# BMJ Open

**Results of a prospective, mixed methods study to assess feasibility, acceptability, and effectiveness of TRIumPH (Treatment and Recovery In Psychosis), an Integrated Care Pathway for Psychosis, compared to usual treatment.**

|                                 |                                                                                                                                                                                                                                                                                                                                                                                                                                                                                                                                  |
|---------------------------------|----------------------------------------------------------------------------------------------------------------------------------------------------------------------------------------------------------------------------------------------------------------------------------------------------------------------------------------------------------------------------------------------------------------------------------------------------------------------------------------------------------------------------------|
| Journal:                        | <i>BMJ Open</i>                                                                                                                                                                                                                                                                                                                                                                                                                                                                                                                  |
| Manuscript ID                   | bmjopen-2019-033711.R2                                                                                                                                                                                                                                                                                                                                                                                                                                                                                                           |
| Article Type:                   | Original research                                                                                                                                                                                                                                                                                                                                                                                                                                                                                                                |
| Date Submitted by the Author:   | 06-Feb-2020                                                                                                                                                                                                                                                                                                                                                                                                                                                                                                                      |
| Complete List of Authors:       | Rathod, Shanaya; Southern Health NHS Foundation Trust, Psychiatry Thorne, Kerensa; Southern Health NHS Foundation Trust, Research and Development<br>Graves, Elizabeth; Southern Health NHS Foundation Trust, Research and Development<br>Phiri, Peter; Southern Health NHS Foundation Trust<br>Asher, Carolyn; Southern Health NHS Foundation Trust<br>Griffiths, Alison; Wessex Academic Health Sciences Network<br>Read, Tracy; Dorset HealthCare NHS Foundation Trust<br>Kingdon, David; University of Southampton, Medicine |
| <b>Primary Subject Heading</b>: | Mental health                                                                                                                                                                                                                                                                                                                                                                                                                                                                                                                    |
| Secondary Subject Heading:      | Evidence based practice, Medical management, Health services research                                                                                                                                                                                                                                                                                                                                                                                                                                                            |
| Keywords:                       | Adult psychiatry < PSYCHIATRY, Early Intervention, Integrated Care Pathways, Schizophrenia & psychotic disorders < PSYCHIATRY                                                                                                                                                                                                                                                                                                                                                                                                    |
|                                 |                                                                                                                                                                                                                                                                                                                                                                                                                                                                                                                                  |

SCHOLARONE™  
Manuscripts



I, the Submitting Author has the right to grant and does grant on behalf of all authors of the Work (as defined in the below author licence), an exclusive licence and/or a non-exclusive licence for contributions from authors who are: i) UK Crown employees; ii) where BMJ has agreed a CC-BY licence shall apply, and/or iii) in accordance with the terms applicable for US Federal Government officers or employees acting as part of their official duties; on a worldwide, perpetual, irrevocable, royalty-free basis to BMJ Publishing Group Ltd ("BMJ") its licensees and where the relevant Journal is co-owned by BMJ to the co-owners of the Journal, to publish the Work in this journal and any other BMJ products and to exploit all rights, as set out in our [licence](#).

The Submitting Author accepts and understands that any supply made under these terms is made by BMJ to the Submitting Author unless you are acting as an employee on behalf of your employer or a postgraduate student of an affiliated institution which is paying any applicable article publishing charge ("APC") for Open Access articles. Where the Submitting Author wishes to make the Work available on an Open Access basis (and intends to pay the relevant APC), the terms of reuse of such Open Access shall be governed by a Creative Commons licence – details of these licences and which [Creative Commons](#) licence will apply to this Work are set out in our licence referred to above.

Other than as permitted in any relevant BMJ Author's Self Archiving Policies, I confirm this Work has not been accepted for publication elsewhere, is not being considered for publication elsewhere and does not duplicate material already published. I confirm all authors consent to publication of this Work and authorise the granting of this licence.

1  
2  
3 **Results of a prospective, mixed methods study to assess feasibility,**  
4 **acceptability, and effectiveness of TRlumPH (Treatment and Recovery In**  
5 **Psychosis), an Integrated Care Pathway for Psychosis, compared to usual**  
6 **treatment.**  
7  
8  
9  
10  
11  
12  
13

14 Shanaya Rathod<sup>1\*</sup>, Kerensa Thorne<sup>1</sup>, Elizabeth Graves<sup>1</sup>, Peter Phiri<sup>1</sup>, Carolyn  
15 Asher<sup>1</sup>, Alison Griffiths<sup>2</sup>, Tracy Read<sup>3</sup>, David Kingdon<sup>4</sup>  
16  
17  
18  
19  
20

21 1 Southern Health NHS Foundation Trust, United Kingdom  
22

23 2 Wessex Academic Health Sciences Network, United Kingdom  
24

25 3 Dorset Healthcare University NHS Foundation Trust, United Kingdom  
26

27 4 University of Southampton, Southampton, United Kingdom  
28  
29  
30  
31  
32  
33  
34

35 **\*Corresponding author:** Dr Shanaya Rathod  
36

37 Email address: shanayarathod@nhs.net  
38

39 Phone: 023 8047 5373  
40

41 Address: Research Department, Clinical Trials Facility, Tom Rudd Unit, Moorgreen  
42 Hospital, Southampton, SO30 3JB  
43  
44  
45  
46  
47  
48  
49  
50  
51  
52  
53  
54  
55  
56  
57  
58  
59  
60

## Abstract

**Objectives:** To evaluate whether a newly developed care pathway, TRlumPH (Treatment and Recovery In Psychosis) is feasible, acceptable and effective in meeting NICE quality standards in a timely manner.

**Methods:** This was a pragmatic, non-randomised, prospective, mixed methods study comparing an implementation (TRlumPH) and comparator site (not implementing TRlumPH) across three cohorts to assess feasibility, acceptability and effectiveness of the integrated pathway.

**Setting:** NHS Early Intervention in Psychosis (EIP) services at two NHS. .

**Participants:** All patients accepted into EIP services between 1 June 2014 and 31 May 2017 were each followed up for one year within their respective cohorts.

**Methodology:** Quantitative data consisted of routinely collected clinical data retrieved from patient records to assess whether the implementation of TRlumPH achieved better concordance to NICE standards. These included: time to access services, physical health assessments, clinical outcomes based timeliness of delivery, acute data. The controlled trial has evaluated the effect of TRlumPH (Intervention) with Care As Usual (Comparator). Qualitative measures consisted of questionnaires, interviews and focus groups to assess acceptability and satisfaction. Outcome measures were compared within the baseline, year 1 and year 2 cohorts and between the two sites. Quantitative data was statistically analysed by comparing means and proportions.

**Results:** Time to assessment improved in the implementation site and remained within the target in comparator site. Meeting of quality standards increased

1  
2  
3 substantially in the implementation site but was more variable and reached lower  
4 levels in the comparator site especially for physical health standards. Cognitive  
5 therapy for psychosis, family intervention, carer and employment support were all  
6 offered to a greater extent in the implementation site and uptake increased over the  
7 period.  
8  
9  
10  
11  
12  
13  
14  
15  
16

17 **Conclusions:** Pathway implementation generally led to greater improvements in  
18 achievement of access and quality standards compared to comparator site.  
19  
20  
21  
22

### 23 **Strengths and Limitations**

- 24 • This is the only evaluation of a psychosis care pathway and results will be  
25 generalizable to NHS and managed care organisations
  - 26 • Baseline differences between the sites could potentially affect interpretation of the  
27 results and conclusions need to be interpreted in this light
  - 28 • Two additional sites initially planned to participate but withdrew during the course of  
29 the study due to inability to provide required data.
  - 30 • Routine data was used to evaluate implementation which had the disadvantage of  
31 leading to significant amounts of missing data in some areas.
  - 32 • Financial and human resource limitations may have had an impact on results
- 33  
34  
35  
36  
37  
38  
39  
40  
41  
42  
43  
44  
45  
46  
47  
48

49 **Study registration:** UK Clinical Research Network Portfolio: 19187  
50  
51  
52

53 **Keywords:** Integrated Care Pathway, psychosis, access, early intervention  
54  
55  
56  
57

58 **Word count: 3965**  
59  
60



## Background

Schizophrenia is listed as the 8<sup>th</sup> leading cause of DALYs worldwide in the age group 15 - 44 years in the World Health Report<sup>1</sup>. In addition to the direct cost, there is a considerable burden on the relatives<sup>2</sup> and life expectancy is reduced by approximately 15-20 years, mostly because of physical health problems<sup>3</sup>.

A primary factor contributing to the impact of schizophrenia is that the longer the duration of untreated psychosis (DUP) the worse the outlook especially for social functioning and recovery<sup>4,5</sup>. DUP has been found to be the strongest predictor of symptom severity and prognosis<sup>6</sup>. A meta-analysis showed a mean DUP of 61.3 weeks<sup>7</sup> and further evidence from trans-cultural and international research suggests that DUP ranges between 364 and 721 days<sup>5,6</sup> and so reducing DUP is of individual, national and international importance<sup>7</sup>.

In order to address both the impact of schizophrenia and the length of DUP the UK government strategy 'No Health Without Mental Health'<sup>8</sup> acknowledged that more must be done to address the disparity in care for people experiencing psychosis. It highlighted the importance of prevention, early detection, and support for evidence-based models such as Early Intervention in Psychosis (EIP) services. The National Access and Waiting Time (AWTS) standard for psychosis<sup>9</sup> announced in England from 1 April 2016 required that more than 50% of people experiencing a first episode psychosis should commence a National Institute of Health and Care Excellence (NICE) recommended package of care<sup>10</sup> within two weeks of referral to secondary care services. This action was specifically introduced to reduce DUP and ensure people access services and start treatment in a timely manner.

1  
2  
3 In addition to the introduction of care standards the Five Year Forward View (NHS  
4 England)<sup>11</sup> recommended development of standardized care pathways for every  
5 major mental health condition. Evidenced-based integrated pathways provide a  
6 standardised framework for good clinical practice, reduce variation in care and  
7 improving outcomes for patients through providing timely access and intervention<sup>12</sup>.  
8 Standardised pathways improve quality by improving multidisciplinary  
9 communication with different care agencies using care planning and improve patient  
10 satisfaction<sup>13</sup>. NICE has formulated quality standards for treatment of schizophrenia  
11 and psychosis<sup>10</sup> but does not prescribe timeframes.  
12  
13  
14  
15  
16  
17  
18  
19  
20  
21  
22  
23  
24

25 TRlumPH (Treatment and Recovery In Psychosis) is a co-developed, integrated  
26 care pathway for psychosis that prescribes time frames around access and clinical  
27 interventions as developed in England<sup>14,15,16</sup>. The work has used a similar approach  
28 to that taken to improve care in other health areas like acute stroke care<sup>13</sup> and has  
29 produced a demonstrable improvement in outcomes for patients and carers. This  
30 new psychosis pathway aims to reduce the impact of disease and promote recovery  
31 by ensuring that every individual gets the best evidence-based care at the right time  
32 and in the right place.  
33  
34  
35  
36  
37  
38  
39  
40  
41  
42  
43

44 In developing the pathway, a multi-pronged approach has been used, using i)  
45 intelligence from information, ii) co-production with individuals with lived experience  
46 of mental illness and their carers, and iii) engagement with clinicians and other  
47 stakeholders including commissioners, primary care and third sector organisations.  
48 The development of TRlumPH used a robust methodology, outlined in previous  
49 publications by this group, which can be adapted and adopted nationally and  
50 internationally<sup>14,15,16</sup>.  
51  
52  
53  
54  
55  
56  
57  
58  
59  
60

1  
2  
3 Therefore, the pathway goals are to treat the symptoms as early as possible, provide  
4 skills to patients and their families, maintain the improvement over a period, prevent  
5 relapses and reintegrate the individuals into the community so that they can lead as  
6 normal a life as possible.  
7  
8  
9  
10  
11  
12  
13  
14

## 15 **Study objectives**

16  
17  
18 The objective of this study was to assess the feasibility, acceptability and  
19 effectiveness of the TRlumPH psychosis care pathway.  
20  
21

- 22  
23 - Does implementation of TRlumPH improve standards in line with the NICE  
24 quality standards as measured by: time taken to access services and waiting  
25 times, lengths of hospital stay, clinical outcomes based on Health of the  
26 Nation Outcome Scales (HoNOS scores)<sup>17</sup>, treatment options offered and how  
27 timely the delivery of these were?  
28  
29  
30  
31  
32  
33
- 34 - How did staff members, service users and carers experience the  
35 implementation of the pathway? Was it feasible and acceptable?  
36  
37  
38  
39  
40

## 41 **Methods**

### 42 **Study design**

43  
44 This is a prospective, mixed methods, pragmatic<sup>18</sup> and non-randomised study  
45 comparing the intervention implementation (TRlumPH pathway) and comparison site  
46 that had treatment as usual to evaluate feasibility, acceptability and effectiveness of  
47 an integrated care pathway, TRlumPH. Both qualitative and quantitative data were  
48 collected and analysed.  
49  
50  
51  
52  
53  
54  
55  
56  
57  
58  
59  
60

## Setting

The study originally had four NHS sites: Early Intervention in Psychosis (EIP) teams from two pathway implementation and two comparator organisations. However, one pathway and one comparator site withdrew in the early stages due to an inability to provide necessary data. The remaining two NHS sites had pre-existing EIP teams who were working according to principles originally set out in the NHS Plan (2000).

### Implementation site

The implementation site was an NHS Trust in the south of England implementing the pathway and covers a population of 1.3 million. This site had four EIP service teams. The Trust was predicted to have an incidence of psychosis of 100 patients (Psymaptic.org).

### Comparator site

The comparator was an NHS Trust in the south of England and covers a population of 780 000. This site had two EIP teams at the start of the study. Due to the needs of the service these two teams were amalgamated into one team during the study period. This Trust was predicted to have an incidence of psychosis of 54 patients (Psymaptic.org).

## Intervention

TRlumPH is an integrated care pathway for psychosis that emphasises the importance of timely access and interventions (see Figure 1). The development, design and details of this pathway have been described in detail in the protocol paper<sup>15</sup> and in other publications<sup>14,16</sup>.

## Treatment as Usual

Participants in the comparator site received treatment as usual (TAU). This usually consisted of care coordination and outpatient appointments when needed. Access to psychological treatments and physical health interventions had been variable. The AWTS target was launched in April 2016, one year after the study started and will have influenced access to treatment in both the implementation and comparator site as a national standard for seeing referrals within two weeks was established. Other requirements for the standard included physical health assessments and availability of treatments.

## Research Ethics Approval and Safety Assessments

Ethics approval was obtained from East of Scotland Research Ethics Service (REC Ref no: LR/15/ES/0091). Written consent was taken for all those providing data for the questionnaires, focus groups and interviews. Quantitative data used for the study was limited to that routinely collected as part of clinical care and consent to access for research purposes was not sought by individual but approved via NHS Ethics Service. No adverse events were identified as a direct result of implementation of the pathway.

## Patient and Public Involvement

Co-production workshops were held with patients, carers and clinicians to develop the pathway and key outcomes areas and a service user researcher sat on the study team. For further details see the previously published protocol<sup>15</sup>.

## Outcome measures

Feasibility and acceptability were assessed through both qualitative and quantitative data collection regarding recruitment, retention and adherence to the process. These measures were defined based on TRIumPH pathway<sup>15,16</sup> and NICE recommendations<sup>10</sup>.

### Quantitative measures:

- Timeliness of access: Waiting times from EIP referral and central triage points, time to allocation and engagement with a care coordinator, time to multidisciplinary team discussion, time to medical formulation, time to care planning approach (CPA meeting), time to risk assessment completion (See figure 1)
- NICE recommended interventions offered: medication, physical health assessment (within three months in accordance with NICE quality standard), psychological intervention (offered within six months), carers support, family intervention, employment support
- Clinical outcomes: Severity of symptoms (HoNoS scores<sup>17</sup>), number of acute admissions during referral, length of hospital stay, mental health act (MHA) sections during referral, A&E attendance and contact with acute mental health services post EIP referral.
- Reason for discharge to assess appropriateness of referrals

These measures were collected for each cohort of participants from the time of their referral for one year. The HoNOS<sup>17</sup> were the source of clinical outcome

1  
2  
3 data collected routinely in the NHS including in EIP. It comprises twelve scales  
4  
5 covering health and social care using a severity measure from 0-4 with 2-4  
6  
7 signifying clinically significant disorder.  
8  
9

### 10 11 12 Qualitative measures

13  
14 Satisfaction and acceptability were assessed using questionnaires, interviews and  
15  
16 focus groups. The later two were only conducted at the intervention site to enable a  
17  
18 process evaluation of the implementation of the pathway at this site. Measures  
19  
20 consisted of the following: patient experience (using specifically designed patient  
21  
22 experience focus groups/interviews), staff experience (staff questionnaires and focus  
23  
24 groups designed to measure the impact of the pathway on staff experience), and  
25  
26 carer experience (using carer focus groups/interviews). Staff experience was  
27  
28 assessed at baseline and after 12 and 24 months, carer and service user experience  
29  
30 was assessed at 12 and 24 months.  
31  
32  
33  
34  
35

### 36 **Sample size**

37  
38  
39 As this was a prospective and pragmatic study, no a priori power and sample size  
40  
41 calculations were performed or required as routinely collected and available data for  
42  
43 all patients and staff during the study period was used.  
44  
45  
46  
47  
48

### 49 **Data Collection**

50  
51 Baseline data was collected for the period 1 June 2014 – 31 May 2015. The pathway  
52  
53 was launched on 1 June 2015 and disseminated to four EIP teams in the  
54  
55 implementation site. Data was collected over the subsequent two-year period on  
56  
57  
58  
59  
60

1  
2  
3 every patient that was referred to and accepted by the EIP teams in participant  
4 organisations. This led to the following cohorts who were all followed up for one year:  
5  
6

7  
8 Baseline (referral received 1 June 2014 – 31 May 2015)  
9

10  
11 Year 1 (referral received 1 June 2015 – 31 May 2016)  
12

13  
14 Year 2 (referral received 1 June 2016 – 31 May 2017)  
15

### 16 17 **Qualitative methods**

18 Staff, patients and carers were approached via the mental health teams they were  
19 currently engaged with. Patients and carers showed a preference to semi-structured  
20 interviews rather than attending offered focus groups. All focus groups and  
21 interviews were audio recorded, transcribed and then coded and analysed using  
22 thematic analysis<sup>19</sup>. Thematic analysis was inductive using themes developed from  
23 the data produced by the structured scripts and remained at a semantic level to allow  
24 for a description of the views reported. Staff was also invited to complete a  
25 questionnaire to explore the impact of the pathway on staff experience and enable  
26 comparisons across the three time points (baseline, 12 & 24 months).  
27  
28  
29  
30  
31  
32  
33  
34  
35  
36  
37  
38  
39

### 40 41 **Statistical Analysis**

42  
43 Continuous normal data was summarised by mean and standard deviation, with  
44 comparisons to baseline made using t-tests. Continuous data that is non-normal as  
45 tested by Kolmogorov-Smirnov or Shapiro-Wilk tests, was presented by median and  
46 interquartile range (IQR) and compared using Mann-Whitney U test. Categorical  
47 variables were presented as n (%) and compared using Chi-Square or Fisher's Exact  
48 test as appropriate. However, no statistical comparisons were undertaken when the  
49 event rates in most groups were <5. p<0.05 was assumed to indicate statistical  
50  
51  
52  
53  
54  
55  
56  
57  
58  
59  
60



1  
2  
3 significance. Missing data was excluded on a case-by-case basis. Statistical  
4  
5 analyses were undertaken using IBM SPSS Statistics 19 and R 3.4.2. It was planned  
6  
7 that in addition to analysing data by comparing means (or ranks) or proportions  
8  
9 (depending on the data), regression analyses would be used to compare groups (for  
10  
11 effect sizes and predictive models). However the extent of the missing data for many  
12  
13 outcome variables meant that the validity and reliability would have been  
14  
15 compromised. Thus, analysis was restricted to exploratory analysis rather than  
16  
17 measuring effects and developing models using regression approach.  
18  
19  
20  
21  
22  
23  
24  
25  
26  
27

## 28 **Results**

29  
30  
31 The participant information and demographic data is presented in Table 1. The  
32  
33 demographic characteristics of individuals in both comparator and pathway site was  
34  
35 broadly similar throughout the study period, with around 3 in 5 of subjects being  
36  
37 male, and the majority being of White Caucasian ethnicity (88-93%), unemployed  
38  
39 (26-54%) and residing in mainstream housing (76-88%).  
40  
41  
42  
43  
44

45 In both sites, the most common source of referral to EIP services was primary care,  
46  
47 making up between 55 to 63% of referrals, followed by other mental health services  
48  
49 (6-23%) and then Emergency Departments (2-9%).  
50  
51  
52  
53

54 Table 1 here  
55  
56  
57  
58  
59  
60

## **Quantitative Results**

### **Timeliness of access**

Table 2 here

Waiting times (shown in table 2) for EIP assessment from both EIP referral and central triage points (teams where referrals received) reduced significantly compared with baseline, from median 11 to 7 days, and from 20 to 11 days respectively ( $p < 0.0001$  for both) in the implementation site. Conversely, in the comparator site the median waiting time from EIP referral to assessment increased significantly from 7 to 12 days ( $p < 0.0001$ ) and was unchanged from central triage to assessment at 33 days ( $p = 0.56$ ). This suggests an improvement in assessment speed following referral to services in the implementation site.

The pathway implementation site also saw significantly reduced waiting times for allocation to and engagement by care co-ordinator, Multidisciplinary team (MDT) discussions, risk assessment completion and discharge of service users found unsuitable for the service on assessment ( $p < 0.0001$  for all). There was no statistically significant difference in the time to medical formulation or Care Programme Approach development (CPA). In the comparator site, time to allocation and engagement by care co-ordinator remained unchanged at median 0 days throughout the study. Although not significantly different from baseline in year 1, by year 2 time to MDT discussion and to risk assessment completion had both increased significantly ( $p < 0.0001$  for both).

1  
2  
3 The numbers of patients accepted onto the EIP case load were much higher than  
4 expected in the comparator site, but this reduced to nearer the expected levels  
5 during the course of the project. The implementation site started below but rose to  
6 just above expected levels.  
7  
8  
9  
10  
11  
12

13  
14 Reasons for discharge from EIP services remained similar in the comparator site  
15 throughout the study. However, in the implementation site there was a significant  
16 change, seemingly led by an increase in the number of unsuitable referrals to the  
17 service, which increased from 55% to 81%. Non-acceptance was also broadly  
18 similar as it was agreed with sites that 'did not meet EIP criteria' and 'discharged on  
19 professional advice' effectively meant the same thing.  
20  
21  
22  
23  
24  
25  
26  
27  
28  
29  
30  
31  
32  
33  
34

### 35 NICE recommended interventions offered

#### 36 *Physical Health Assessments*

37  
38  
39  
40 Table 3 here  
41  
42  
43  
44

45 Both sites of the study saw significant improvements in the proportion of individuals  
46 receiving assessments of their general physical health, substance use, alcohol use  
47 and weight, having their bloods taken and given ECGs, but at much higher levels in  
48 the implementation site as seen in Table 3. Assessment of smoking status  
49 increased significantly at the implementation site ( $p=0.00033$ ). Measurements of  
50 pulse and blood pressure assessments increased significantly in the comparator site  
51 ( $p=0.010$ ,  $p=0.0036$ ). Assessment of waist measurement increased significantly in  
52  
53  
54  
55  
56  
57  
58  
59  
60

1  
2  
3 the pathway implementation site ( $p=0.011$ ) whilst decreasing significantly in the  
4 comparator site ( $p=0.0037$ ). Finally, neither site significantly increased the number of  
5 individuals receiving a full 8-point NICE recommended health check within 8 weeks  
6 of EIP assessment.  
7  
8  
9  
10  
11  
12  
13

### 14 *Other Interventions*

15  
16 The proportion of individuals being offered CBT (Cognitive Behaviour Therapy)  
17 increased significantly in the comparator site from 1% to 22% ( $p<0.0001$ ) and was  
18 matched with a significant increase in taking up CBT intervention from 0% to 7%  
19 ( $p=0.010$ ). The implementation site did not see any significant change in either of  
20 these factors. However throughout the period, CBT for psychosis and family work for  
21 psychosis were much more likely to be offered (Table 3).  
22  
23  
24  
25  
26  
27  
28  
29  
30  
31  
32

33 Prevalence of individuals receiving any of the listed interventions increased in both  
34 the pathway (83% to 94%,  $p=0.0071$ ) and comparator sites (57% to 81%,  $p<0.0001$ ),  
35 as did engagement (75% to 90%,  $p=0.039$  and 57% to 79%,  $p<0.0001$  respectively)  
36 from baseline to year 2.  
37  
38  
39  
40  
41  
42  
43

44 The implementation site saw increases in the proportion of participants receiving  
45 carer support (35% to 68%,  $p<0.0001$ ) and medication (54% to 73%,  $p=0.027$ ),  
46 although neither of these changed significantly in the comparator site. Receipt of  
47 collaborative care planning increased significantly in the implementation site (32% to  
48 69%,  $p<0.0001$ ) whilst the comparator site saw a decrease (31% to 1%,  $p<0.0001$ ).  
49 Prevalence of physical health interventions also decreased in the comparator site  
50 (26% to 15%,  $p<0.0001$ ) but did not change significantly in the implementation site,  
51  
52  
53  
54  
55  
56  
57  
58  
59  
60

1  
2  
3 remaining low (3% to 6%,  $p=0.58$ ). Receipt of vocational support increased  
4 significantly in both the implementation site (20% to 72%,  $p<0.0001$ ) and the  
5 comparator site (20% to 39%,  $p=0.0023$ ). However subsequently, after six months,  
6 there was a much higher take-up rate with over 80% in the implementation and over  
7 70% in the comparator site.  
8  
9  
10  
11  
12  
13  
14  
15  
16

17 Table 4 here  
18  
19  
20  
21  
22  
23  
24  
25  
26  
27  
28  
29  
30  
31  
32

### 33 Clinical Outcomes

#### 34 *Acute care*

35  
36  
37 There was a substantial contrast in the numbers of patients who had been admitted  
38 to hospital at the point of referral, much higher in the implementation site compared  
39 to comparator but reducing over time (table 4). Further admissions were low across  
40 both sites with neither site seeing a significant change in the prevalence of acute  
41 mental health admissions, in the time to being admitted or in the time to discharge.  
42 Similarly, the number of EIP participants subject to MHA section did not change  
43 significantly, although there was a tendency towards a decrease in the  
44 implementation site (36% to 33% to 27%,  $p=0.58$ ). In both sites, the number of EIP  
45 service users attending Emergency Department (ED) or general hospital within a  
46 year was low (7-10%) and there were no significant changes over time.  
47  
48  
49  
50  
51  
52  
53  
54  
55  
56  
57  
58  
59  
60

### *Crisis planning*

In the implementation site, the proportion of participants having a crisis plan completed reduced significantly (51% to 35%,  $p=0.032$ ), occurring alongside a decrease in the time to crisis plan completion (50.0 to 12.5 weeks,  $p<0.0001$ ) as seen in table 4. Conversely, in the comparator site the proportion of participants having a crisis plan completed increased significantly (49% to 67%,  $p=0.00023$ ).

Table 5 here

### *Clinical and social outcomes*

These were assessed by extracting the data routinely collected using the Health of the Nation Outcome Scales (HoNOS) as seen in table 5. At the implementation site there were significant reductions over the two-year period in 'problems with relationships' ( $p=0.013$ ) and 'problems with occupation and activities' ( $p=0.037$ ). At the comparator site there were significant reductions in 'problems with activities of daily living' ( $p=0.04$ ). The comparator site however had substantial amounts of missing data. There was no significant difference in reductions in 'problems with delusions and hallucinations' between sites.

### *Criminal justice system contact*

The number of participants having contact with the criminal justice system decreased significantly in the implementation site (22% to 3%,  $p<0.0001$ ) whilst increasing significantly in the comparator site (14% to 21%,  $p<0.0001$ ). Criminal convictions were rare in both sites (table 4).

### *Discharge and death*

Discharge from services within a year of patients accepted by EIP teams (Table 2), was relatively low although disengagement remained a concern. It reduced in the implementation site (18% to 11%) and remained stable in comparator (10% to 12%). There was one death of a participant within a year of EIP assessment in the comparator site, Year 2 cohort (Table 4).

### **Qualitative Results**

#### *Staff and patient interviews and focus groups*

Across the two years, 64 staff in the implementation site took part in focus groups and reported that the psychosis pathway appeared to be beneficial, well embedded and a positive change with good team working within the teams and with other services. However, they found workload to be high and had some difficulties getting the right staff skills mix in teams to deliver all the needed interventions. They also noted that often interventions were offered but were not always completed due to patient's ability to engage with them. Additionally, they worried about future changes being implemented in addition to their current workload. They felt by year 2 that they were more able to adapt the pathway to individuals' needs which they saw as important rather than a prescriptive measure.

Patients (14 participants) in the implementation site reported that they were generally satisfied with being seen quickly and developed good relationships with the staff members. They found appointments helpful and felt they gained useful skills. However, they also reported that at times there was inconsistencies in the staff they

1  
2  
3 saw and out of hours services could be improved. Carers views (7) in the  
4  
5 implementation site appeared to improve from year 1 to year 2 with more positive  
6  
7 reports about the team and services than at year 1, however at both time points the  
8  
9 sample was small.  
10  
11  
12  
13

### 14 *Results from staff questionnaires*

15  
16 In total 1,680 questionnaires were completed by staff members in the  
17  
18 implementation and comparator site across the three time points. There was no  
19  
20 notable change in staff experience across the time points or between the sites  
21  
22 (Supplementary Table 1). All staff members with adult mental health services were  
23  
24 eligible to complete this questionnaire to capture the experience of staff referring into  
25  
26 services and caring for services users with psychosis in services such as hospital  
27  
28 settings.  
29  
30  
31  
32  
33  
34  
35

## 36 **Discussion**

37  
38 This comparison study provides evidence that the introduction of an integrated  
39  
40 psychosis care pathway led to improvements in access to EIP and implementation of  
41  
42 quality standards, especially for physical health care in comparison with a site which  
43  
44 did not implement the pathway. In terms of acceptability and feasibility, staff, service  
45  
46 user and carer attitudes to TRlumPH were found to be generally positive. However,  
47  
48 there were pre-existing differences during the baseline period between the sites,  
49  
50 which influenced the comparison as seen by access and waiting times, and level of  
51  
52 interventions offered. Prior to the project, the implementation site had dismantled  
53  
54 three out of four EIP teams and integrated them into community mental health  
55  
56  
57  
58  
59  
60



1  
2  
3 teams, in contrast to the comparator site which had maintained specialist teams. At  
4  
5 the beginning of the project the implementation site reintroduced the four EIP teams.  
6  
7 There was a marked difference in referrals in each site with movement in both sites  
8  
9 towards predicted levels of patients accepted by EIP teams. This reflects the  
10  
11 variations in service commissioning and provision landscape in the UK which can be  
12  
13 geographically determined and can potentially impact on outcomes. There are other  
14  
15 factors like staff skillset, recruitment, data quality among others. Due to the  
16  
17 pragmatic nature of the study, it was not designed to explore these differences and  
18  
19 their potential impact.  
20  
21  
22  
23  
24  
25

26 Time to assessment improved in the implementation site and remained within the  
27  
28 AWTS in the comparator site. From a patient and carer perspective, a reduction in  
29  
30 waiting times and DUP even of a few days, especially when acutely unwell, could be  
31  
32 meaningful for example the potential impact being unwell could cause on  
33  
34 relationships and employment. Referral from the Central Triage Point was relatively  
35  
36 high especially in the comparator site, as was found by Birchwood and colleagues<sup>20</sup>  
37  
38 and this remains an important area for attention.  
39  
40  
41  
42  
43  
44

45 Compliance with quality standards increased substantially in the implementation site  
46  
47 but was more variable and reached lower levels in the comparator site. This was  
48  
49 especially noticeable for physical health standards, although the full set of NICE  
50  
51 recommendations was only met in under 10% patients within 3 months of  
52  
53 acceptance. In the implementation site, offering of CBT for psychosis was relatively  
54  
55 high throughout, although uptake within 6 months was low. However, by 2 years,  
56  
57 this was considerably higher. There was an increase in offering of CBT and family  
58  
59  
60

1  
2  
3 work in the comparator site from a very low baseline, attributed to a lack of fully  
4 trained therapists. This seems an area where implementation of the quality  
5 standards through a pathway process could be especially effective. Family  
6 intervention, carer and employment support were all offered to a greater extent in  
7 implementation site and uptake increased over the period. The findings also  
8 compare favourably with those of the National Clinical Audit of Psychosis<sup>21</sup>.  
9  
10  
11  
12  
13  
14  
15  
16  
17  
18

19 The changes in teams were reflected in the results as numbers of patients accepted  
20 onto case load were much higher than expected in the comparator site but reduced  
21 to nearer expected levels during the project. Referrals increased substantially in  
22 implementation site but then plateaued after introduction of the pathway.  
23  
24  
25  
26  
27  
28  
29  
30

31 The introduction of the AWTS target brought increased funding for EIP nationally. In  
32 the implementation site the local service commissioners remained well engaged with  
33 the pathway implementation and resulting outcomes and this enabled positive  
34 contract discussions for future investment. A formal cost effectiveness analysis was  
35 not conducted due to limitations in data availability but the reduction in patients  
36 admitted to inpatient wards and the subsequent reduction in relapses to hospital  
37 suggest that the implementation of the pathway could be expected to have had a  
38 positive impact on cost in the implementation site.  
39  
40  
41  
42  
43  
44  
45  
46  
47

48 However, not all outcomes for the intervention site were positive, for example the  
49 decrease in the recording of crisis plans, paralleled by the significant increase in the  
50 comparator site are worth note.  
51  
52  
53  
54  
55  
56  
57  
58  
59  
60

## Study Limitations

This is an observational prospective study based on manual audit of patients' medical records. Therefore, causality cannot be assumed. We took steps to maintain data consistency by having one dedicated member of staff involved in the data audit throughout, and by performing post-hoc data checks for consistency and outliers. However, data accuracy is naturally limited by the quality of mental health care providers' original record keeping. This was additionally limited by the amount of analyses performed on the data. Furthermore, missing data was common, for example only 237 (33%) of participants had a HoNoS score recorded at both referral and one year later. The HoNoS data was lower in the comparator site which meant it was not meaningful to test for changes among cohorts at the comparator sites due to the fact that 90% had missing data.

## Conclusion

This comparison of the implementation of a quality standard based psychosis pathway with a comparator site which followed established guidelines for Early Intervention for Psychosis teams suggests that the former was more effective at improving the level of evidence-based practice offered to patients and their carers. Integrated care pathways can offer a platform to inform gaps in services, implement good clinical practice and measure the impact.

## Competing interests

1  
2  
3 The production of the pathway has been supported by the Wessex Academic Health  
4 Sciences Network (AHSN) and evaluation has also been supported by the Wessex  
5 Clinical Research Network (CRN). The views and opinions expressed therein are  
6 those of the authors and do not necessarily reflect those of funders, NIHR, NHS or  
7 the RCPsych, AHSN or CRN. The study is sponsored by Southern Health NHS  
8 Foundation Trust.  
9  
10  
11  
12  
13  
14  
15  
16  
17  
18

### 19 **Funding Statement**

20  
21 This project has been funded by the NHS England (Regional Innovation Fund  
22 programme); Small grant from the Royal College of Psychiatrists General Adult  
23 Psychiatry Faculty.  
24  
25  
26  
27  
28  
29  
30

### 31 **Study Status**

32  
33 The study is complete.  
34  
35  
36  
37  
38

### 39 **Authors' contributions**

40  
41  
42 SR and DK are grant holders and contributed to the concept and design of the study.  
43  
44 SR is the CI and led the development of the study protocol and study documentation  
45 and made a significant contribution to the manuscript. KT provided statistical  
46 expertise throughout the protocol development, data collection and analysis. CA  
47 provided PPI expertise throughout the protocol development and study delivery. AG  
48 supported the implementation of the TRIumPH development and delivery. EG, PP  
49 and TR supported the delivery of the study at their respective sites. All authors  
50  
51  
52  
53  
54  
55  
56  
57  
58  
59  
60

1  
2  
3 contributed to elaboration and refinement of the study protocol and approved the  
4  
5 final manuscript.  
6  
7  
8  
9

## 10 **Data Availability**

11  
12 All data relevant to the study are included in the article or uploaded as  
13  
14 supplementary information.  
15  
16  
17  
18  
19

## 20 **Acknowledgements**

21  
22 We would like to thank everyone who has been involved at any stage of this study.  
23  
24  
25  
26  
27  
28  
29

## 30 **Figure 1 Caption**

31  
32  
33 TRIumPH Pathway  
34  
35  
36  
37  
38  
39

## 40 **References**

- 41 1. World Health Organisation. *The World Health Report 2001. Mental Health: New*  
42 *Understanding. New Hope.* Geneva2005.
- 43 2. Rössler W, Salize HJ, van Os J, Riecher-Rössler A. Size of burden of schizophrenia  
44 and psychotic disorders. *Eur Neuropsychopharmacol.* 2005;15(4):399-409.
- 45 3. Chang CK, Hayes RD, Perera G, Broadbent MT, Fernandes AC, Lee WE, et al. Life  
46 expectancy at birth for people with serious mental illness and other major disorders  
47 from a secondary mental health care case register in London. *PLoS One.* 2011; 6(5):  
48 e19590  
49
- 50 4. Drake RJ, Haley CJ, Akhtar S, Lewis SW. Causes and consequences of duration of  
51 untreated psychosis in schizophrenia. *Br J Psychiatry.* 2000;177:511-515.
- 52 5. McGlashan TH. Duration of untreated psychosis in first-episode schizophrenia:  
53 marker or determinant of course? *Biol Psychiatry.* 1999;46(7):899-907.
- 54 6. Marshall M, Lewis S, Lockwood A, Drake R, Jones P, Croudace T. Association  
55 between duration of untreated psychosis and outcome in cohorts of first-episode  
56 patients: a systematic review. *Arch Gen Psychiatry.* 2005;62(9):975-983.  
57  
58  
59  
60

- 1
  - 2
  - 3
  - 4
  - 5
  - 6
  - 7
  - 8
  - 9
  - 10
  - 11
  - 12
  - 13
  - 14
  - 15
  - 16
  - 17
  - 18
  - 19
  - 20
  - 21
  - 22
  - 23
  - 24
  - 25
  - 26
  - 27
  - 28
  - 29
  - 30
  - 31
  - 32
  - 33
  - 34
  - 35
  - 36
  - 37
  - 38
  - 39
  - 40
  - 41
  - 42
  - 43
  - 44
  - 45
  - 46
  - 47
  - 48
  - 49
  - 50
  - 51
  - 52
  - 53
  - 54
  - 55
  - 56
  - 57
  - 58
  - 59
  - 60
7. Penttilä M, Jääskeläinen E, Hirvonen N, Isohanni M, Miettunen J. Duration of untreated psychosis as predictor of long-term outcome in schizophrenia: systematic review and meta-analysis. *Br J Psychiatry*. 2014;205(2):88-94.
8. Department of H. *No health without mental health*. UK: Department of Health; 2011.
9. NHS England. Guidance to support the introduction of access and waiting time standards for mental health services in 2015/16. In. *NHS England*. London: NHS England; 2015.
10. NICE. Psychosis and schizophrenia in adults. Quality standard [QS80]. <https://www.nice.org.uk/guidance/qs80>. Published 2015. Accessed 31st May, 2019.
11. NHS England. Mental Health Task Force. Five year forward view. In. London: NHS England.; 2016.
12. Campbell H, Hotchkiss R, Bradshaw N, Porteous M. Integrated care pathways. *BMJ*. 1998;316(7125):133-137.
13. Excellence. NifHaSC. Stroke and Transient Ischaemic Attack. <https://www.nice.org.uk/guidance/conditions-and-diseases/cardiovascular-conditions/stroke-and-transient-ischaeamic-attack>. Published 2019. Accessed.
14. Rathod S, Griffiths A, Kingdon D, Tiplady B, Jones T. Pathways to recovery: A case for adoption of systematic pathways in psychosis. In. London: Jointly produced by Imperial College Health Partners and Wessex Academic Health Science Network supported by the Royal College of Psychiatrists and Rethink Mental Illness; 2015.
15. Rathod S, Garner C, Griffiths A, et al. Protocol for a multicentre study to assess feasibility, acceptability, effectiveness and direct costs of TRIumph (Treatment and Recovery In Psychosis): integrated care pathway for psychosis. *BMJ Open*. 2016;6(12):e012751.
16. Network WAHS. TRIumph - Treatment and Recovery in Psychosis. <https://wessexahsn.org.uk/projects/59/triumph-treatment-and-recovery-in-psychosis>. Published 2015. Accessed.
17. Preti A, Pisano A, Cascio MT, et al. Validation of the Health of the Nation Outcome Scales as a routine measure of outcome in early intervention programmes. *Early Interv Psychiatry*. 2012;6(4):423-431.
18. Bergman, MM. Straw man of the Qualitative-Quantitative Divide. IN: Bergmann MM (ed.) *Advances in Mixed Methods Research*. London: Sage Publications; 2008
19. Braun V, Clarke V. Using thematic analysis in psychology. *Qualitative research in psychology*. 2006;3(2):77-101. Birchwood M, Connor C, Lester H, et al. Reducing duration of untreated psychosis: care pathways to early intervention in psychosis services. *Br J Psychiatry*. 2013;203(1):58-64.
20. Birchwood M, Connor C, Lester H, et al. Reducing duration of untreated psychosis: care pathways to early intervention in psychosis services. *Br J Psychiatry*. 2013;203(1):58-64.
21. Royal College of Psychiatrists. *Report of the National Audit of Schizophrenia (NAS) 2019*. London: Royal College of Psychiatrists Healthcare Quality Improvement Partnership; 2019.

## Tables

**Table 1: Demographic information for all individuals referred to EIP service. Numbers represent either median (IQR) for continuous variables or proportions for categorical variables. Excludes EIP to EIP transfers.**

|                                                                 | Implementation site    |                        |                        | Comparator Site        |                        |                        |
|-----------------------------------------------------------------|------------------------|------------------------|------------------------|------------------------|------------------------|------------------------|
|                                                                 | Baseline<br>(n=123)    | Year 1<br>(n=416)      | Year 2<br>(n=463)      | Baseline<br>(n=237)    | Year 1<br>(n=271)      | Year 2<br>(n=252)      |
| Age (Years)                                                     | 22.4<br>(19.3 to 28.2) | 21.4<br>(19.0 to 26.1) | 21.6<br>(19.0 to 25.9) | 19.4<br>(16.7 to 24.9) | 19.7<br>(17.1 to 24.8) | 21.8<br>(17.9 to 30.3) |
| Gender:                                                         |                        |                        |                        |                        |                        |                        |
| <i>Female</i>                                                   | 35%                    | 40%                    | 39%                    | 43%                    | 40%                    | 38%                    |
| <i>Male</i>                                                     | 65%                    | 60%                    | 61%                    | 57%                    | 60%                    | 62%                    |
| Ethnicity:                                                      |                        |                        |                        |                        |                        |                        |
| <i>White</i>                                                    | 88%                    | 89%                    | 93%                    | 92%                    | 93%                    | 92%                    |
| <i>Black or Black British</i>                                   | 5%                     | 3%                     | 3%                     | 1%                     | 3%                     | 1%                     |
| <i>Asian or Asian British</i>                                   | 0%                     | 2%                     | 0%                     | 1%                     | 1%                     | 1%                     |
| <i>Mixed race</i>                                               | 3%                     | 3%                     | 2%                     | 3%                     | 1%                     | 4%                     |
| <i>Other</i>                                                    | 5%                     | 2%                     | 1%                     | 3%                     | 3%                     | 2%                     |
| Accommodation Status:                                           |                        |                        |                        |                        |                        |                        |
| <i>Accommodation with MH care support</i>                       | 3%                     | 1%                     | 0%                     | 0%                     | 2%                     | 0%                     |
| <i>Accommodation with other support</i>                         | 3%                     | 4%                     | 7%                     | 4%                     | 5%                     | 2%                     |
| <i>Acute/long stay healthcare residential facility/hospital</i> | 0%                     | 0%                     | 1%                     | 3%                     | 8%                     | 13%                    |
| <i>Homeless</i>                                                 | 7%                     | 9%                     | 13%                    | 10%                    | 8%                     | 7%                     |
| <i>Mainstream housing</i>                                       | 88%                    | 86%                    | 80%                    | 79%                    | 76%                    | 76%                    |
| <i>Bail/probation hostel</i>                                    | 0%                     | 0%                     | 0%                     | 2%                     | 0%                     | 0%                     |
| <i>Other</i>                                                    | 0%                     | 0%                     | 0%                     | 2%                     | 1%                     | 3%                     |
| Employment status:                                              |                        |                        |                        |                        |                        |                        |
| <i>Employed</i>                                                 | 38%                    | 20%                    | 29%                    | 24%                    | 26%                    | 20%                    |
| <i>Unemployed</i>                                               | 26%                    | 38%                    | 40%                    | 48%                    | 40%                    | 54%                    |
| <i>Homemaker</i>                                                | 1%                     | 2%                     | 1%                     | 4%                     | 3%                     | 1%                     |
| <i>Student</i>                                                  | 16%                    | 15%                    | 14%                    | 11%                    | 12%                    | 11%                    |
| <i>Long term sickness/disability benefit</i>                    | 15%                    | 16%                    | 12%                    | 9%                     | 5%                     | 5%                     |
| <i>Statutory sick pay</i>                                       | 0%                     | 3%                     | 0%                     | 5%                     | 9%                     | 3%                     |
| <i>Retired</i>                                                  | 0%                     | 0%                     | 0%                     | 0%                     | 0%                     | 1%                     |
| <i>Other</i>                                                    | 3%                     | 6%                     | 4%                     | 0%                     | 4%                     | 4%                     |
| Change in employment status during EIP:                         |                        |                        |                        |                        |                        |                        |
| <i>No reported change</i>                                       | 58 (84%)               | 107 (91%)              | 124 (100%)             | 128 (88%)              | 163 (97%)              | 88 (86%)               |
| <i>Became employed</i>                                          | 0 (0%)                 | 4 (3%)                 | 0 (0%)                 | 13 (9%)                | 2 (1%)                 | 5 (5%)                 |
| <i>Left employment/became unemployed</i>                        | 10 (14%)               | 4 (3%)                 | 0 (0%)                 | 4 (3%)                 | 2 (1%)                 | 3 (3%)                 |
| <i>Other</i>                                                    | 1 (1%)                 | 3 (3%)                 | 0 (0%)                 | 0 (0%)                 | 1 (1%)                 | 6 (6%)                 |
| Referral source:                                                |                        |                        |                        |                        |                        |                        |
| <i>Primary care</i>                                             | 75 (62%)               | 256 (63%)              | 283 (62%)              | 143 (60%)              | 172 (63%)              | 139 (55%)              |
| <i>Community mental health service</i>                          | 19 (16%)               | 66 (16%)               | 104 (23%)              | 14 (6%)                | 26 (10%)               | 14 (6%)                |
| <i>Inpatient mental health service</i>                          | 1 (1%)                 | 21 (5%)                | 15 (3%)                | 12 (5%)                | 16 (6%)                | 4 (2%)                 |
| <i>A&amp;E department</i>                                       | 11 (9%)                | 20 (5%)                | 21 (5%)                | 5 (2%)                 | 13 (5%)                | 23 (9%)                |
| <i>Physical healthcare service</i>                              | 0 (0%)                 | 13 (3%)                | 8 (2%)                 | 4 (2%)                 | 8 (3%)                 | 2 (1%)                 |
| <i>Caring and social services</i>                               | 0 (0%)                 | 0 (0%)                 | 5 (1%)                 | 10 (4%)                | 5 (2%)                 | 11 (4%)                |
| <i>Education service</i>                                        | 0 (0%)                 | 6 (1%)                 | 4 (1%)                 | 12 (5%)                | 7 (3%)                 | 8 (3%)                 |
| <i>Police/prison/probation</i>                                  | 9 (7%)                 | 8 (2%)                 | 11 (2%)                | 14 (6%)                | 11 (4%)                | 25 (10%)               |
| <i>Self-referral</i>                                            | 1 (1%)                 | 2 (0%)                 | 2 (0%)                 | 12 (5%)                | 6 (2%)                 | 17 (7%)                |
| <i>Other</i>                                                    | 5 (4%)                 | 16 (4%)                | 4 (1%)                 | 11 (5%)                | 8 (3%)                 | 9 (4%)                 |
| Central triage point (CTP):                                     |                        |                        |                        |                        |                        |                        |
| <i>EIP</i>                                                      | 22 (18%)               | 107 (26%)              | 120 (26%)              | 33 (14%)               | 24 (9%)                | 27 (11%)               |
| <i>Community mental health service</i>                          | 98 (80%)               | 281 (69%)              | 325 (71%)              | 183 (78%)              | 217 (81%)              | 184 (73%)              |

1  
2  
3  
4  
5  
6  
7  
8  
9  
10  
11  
12  
13  
14  
15  
16  
17  
18  
19  
20  
21  
22  
23  
24  
25  
26  
27  
28  
29  
30  
31  
32  
33  
34  
35  
36  
37  
38  
39  
40  
41  
42  
43  
44  
45  
46  
47  
48  
49  
50  
51  
52  
53  
54  
55  
56  
57  
58  
59  
60

|                                        |        |         |         |         |          |          |
|----------------------------------------|--------|---------|---------|---------|----------|----------|
| <i>Inpatient mental health service</i> | 2 (2%) | 21 (5%) | 14 (3%) | 17 (7%) | 26 (10%) | 27 (11%) |
| <i>Physical healthcare service</i>     | 0 (0%) | 1 (0%)  | 0 (0%)  | 0 (0%)  | 0 (0%)   | 0 (0%)   |
| <i>Police/prison/probation</i>         | 0 (0%) | 0 (0%)  | 0 (0%)  | 3 (1%)  | 2 (1%)   | 14 (6%)  |

For peer review only



**Table 2: Process outcomes for all individuals referred to EIP service. Numbers represent either N (%) for categorical variables or median (IQR) for continuous variables. Excludes EIP to EIP transfers. P values for categorical comparisons from chi-squared test or Fisher's exact test as appropriate. P values for continuous data from Mann-Whitney U tests.**

|                                                                  | Implementation site    |                       |                       |                                             |                                             | Comparator site         |                        |                        |                                             |                                             |
|------------------------------------------------------------------|------------------------|-----------------------|-----------------------|---------------------------------------------|---------------------------------------------|-------------------------|------------------------|------------------------|---------------------------------------------|---------------------------------------------|
|                                                                  | Baseline<br>(n=123)    | Year One<br>(n=416)   | Year Two<br>(n=463)   | P value<br>Y1 vs baseline<br>Y2 vs baseline | P value<br>Y1 vs baseline<br>Y2 vs baseline | Baseline<br>(n=237)     | Year One<br>(n=271)    | Year Two<br>(n=252)    | P value<br>Y1 vs baseline<br>Y2 vs baseline | P value<br>Y1 vs baseline<br>Y2 vs baseline |
| Accepted onto EIP pathway                                        | 69 (56%)               | 118 (28%)             | 124 (27%)             | < 0.0001                                    | < 0.0001                                    | 145 (61%)               | 168 (62%)              | 102 (40%)              | 0.89                                        | < 0.0001                                    |
| Time from EIP referral to EIP assessment (in days)               | 11.0<br>(6.0 to 20.5)  | 6.0<br>(3.0 to 12.0)  | 7.0<br>(4.0 to 14.0)  | < 0.0001                                    | < 0.0001                                    | 7.0<br>(3.0 to 12.0)    | 7.0<br>(4.0 to 12.8)   | 12.0<br>(7.0 to 21.0)  | 0.24                                        | < 0.0001                                    |
| Time from CTP referral to EIP assessment (in days)               | 20.0<br>(11.8 to 55.3) | 15.0<br>(6.0 to 40.0) | 11.0<br>(6.0 to 23.0) | 0.0053                                      | < 0.0001                                    | 33.0<br>(11.0 to 142.5) | 24.0<br>(9.3 to 130.5) | 33.0<br>(13.0 to 98.0) | 0.45                                        | 0.96                                        |
| DNAs prior to assessment                                         |                        |                       |                       |                                             |                                             |                         |                        |                        |                                             |                                             |
| 0                                                                | 113 (92%)              | 378 (91%)             | 434 (94%)             |                                             | 0.37                                        | 211 (89%)               | 247 (91%)              | 232 (92%)              |                                             | 0.59                                        |
| 1                                                                | 7 (6%)                 | 28 (7%)               | 17 (4%)               |                                             |                                             | 17 (7%)                 | 19 (7%)                | 12 (5%)                |                                             |                                             |
| 2 or more                                                        | 3 (2%)                 | 10 (2%)               | 12 (3%)               |                                             |                                             | 9 (4%)                  | 6 (2%)                 | 9 (4%)                 |                                             |                                             |
| Time to allocation and engagement by care coordinator (in weeks) | 4.0<br>(0.0 to 11.0)   | 1.0<br>(0.0 to 5.0)   | 0.0<br>(0.0 to 3.0)   | 0.0033                                      | < 0.0001                                    | 0.0<br>(0.0 to 7.3)     | 0.0<br>(0.0 to 7.0)    | 0.0<br>(0.0 to 14.8)   | 0.054                                       | 0.48                                        |
| Time to multidisciplinary team (MDT) discussion (in weeks)       | 6.2<br>(1.7 to 20.0)   | 1.9<br>(1.0 to 4.6)   | 1.9<br>(0.9 to 3.0)   | < 0.0001                                    | < 0.0001                                    | 1.8<br>(0.7 to 3.0)     | 1.7<br>(1.0 to 2.7)    | 4.9<br>(1.8 to 28.0)   | 0.74                                        | < 0.0001                                    |
| Time to medical formulation (in weeks)                           | 4.7<br>(2.3 to 8.4)    | 3.9<br>(1.9 to 8.4)   | 3.3<br>(1.9 to 6.0)   | 0.45                                        | 0.11                                        | 6.5<br>(2.3 to 10.3)    | 6.7<br>(2.4 to 11.0)   | 8.3<br>(3.8 to 11.9)   | 0.99                                        | 0.14                                        |
| Time to CPA (care plan approach) / care plan (in weeks)          | 2.4<br>(0.0 to 6.9)    | 2.7<br>(0.8 to 5.4)   | 2.0<br>(0.4 to 5.8)   | 0.62                                        | 0.87                                        | 2.0<br>(0.7 to 5.6)     | 3.0<br>(1.0 to 14.5)   | 13.0<br>(4.3 to 34.0)  | 0.080                                       | < 0.0001                                    |
| Time to risk assessment completion (in weeks)                    | 50.3<br>(2.6 to 91.1)  | 6.4<br>(1.0 to 15.3)  | 4.7<br>(1.4 to 8.1)   | < 0.0001                                    | < 0.0001                                    | 5.3<br>(1.4 to 15.0)    | 3.6<br>(1.0 to 15.1)   | 4.6<br>(1.1 to 13.4)   | 0.38                                        | 0.60                                        |
| Reason for non-acceptance to EIP:                                |                        |                       |                       |                                             |                                             |                         |                        |                        |                                             |                                             |
| Does not fulfil EIP criteria                                     | 29 (71%)               | 202 (79%)             | 280 (85%)             |                                             | 0.0010                                      | 18 (20%)                | 20 (19%)               | 28 (19%)               |                                             | 0.76                                        |
| Discharged on professional advice                                | 4 (10%)                | 14 (5%)               | 2 (1%)                |                                             |                                             | 62 (67%)                | 65 (63%)               | 100 (66%)              |                                             |                                             |
| DNA/did not engage/declined treatment                            | 6 (15%)                | 27 (11%)              | 35 (11%)              |                                             |                                             | 5 (5%)                  | 8 (8%)                 | 13 (9%)                |                                             |                                             |
| Moved out of area                                                | 0 (0%)                 | 11 (4%)               | 10 (3%)               |                                             |                                             | 6 (7%)                  | 7 (7%)                 | 9 (6%)                 |                                             |                                             |

|                                                                       | Implementation site |            |            |                |                | Comparator site |           |          |                |                |
|-----------------------------------------------------------------------|---------------------|------------|------------|----------------|----------------|-----------------|-----------|----------|----------------|----------------|
|                                                                       | Baseline            | Year One   | Year Two   | P value        | P value        | Baseline        | Year One  | Year Two | P value        | P value        |
|                                                                       | (n=123)             | (n=416)    | (n=463)    | Y1 vs baseline | Y2 vs baseline | (n=237)         | (n=271)   | (n=252)  | Y1 vs baseline | Y2 vs baseline |
| <i>Other</i>                                                          | 2 (5%)              | 3 (1%)     | 4 (1%)     |                |                | 1 (1%)          | 4 (4%)    | 1 (1%)   |                |                |
| Reason for discharge from EIP after acceptance:                       |                     |            |            |                |                |                 |           |          |                |                |
| <i>Care completed</i>                                                 | 4 (15%)             | 4 (9%)     | 0 (0%)     | 0.076          |                | 0 (0%)          | 0 (0%)    | 0 (0%)   |                | 0.40           |
| <i>Does not fulfil EIP criteria</i>                                   | 8 (31%)             | 22 (48%)   | 22 (50%)   |                |                | 7 (6%)          | 6 (5%)    | 4 (9%)   |                |                |
| <i>Discharged on professional advice</i>                              | 0 (0%)              | 1 (2%)     | 3 (7%)     |                |                | 80 (72%)        | 72 (61%)  | 25 (54%) |                |                |
| <i>DNA/did not engage/declined treatment</i>                          | 6 (23%)             | 8 (17%)    | 8 (18%)    |                |                | 16 (14%)        | 25 (21%)  | 11 (24%) |                |                |
| <i>Moved out of area</i>                                              | 5 (19%)             | 11 (24%)   | 9 (20%)    |                |                | 7 (6%)          | 12 (10%)  | 5 (11%)  |                |                |
| <i>Other</i>                                                          | 3 (12%)             | 0 (0%)     | 2 (5%)     |                |                | 1 (1%)          | 4 (3%)    | 1 (2%)   |                |                |
| Change in accommodation status during EIP:                            |                     |            |            |                |                |                 |           |          |                |                |
| <i>No reported change</i>                                             | 63 (91%)            | 118 (100%) | 124 (100%) | <0.0001        |                | 136 (94%)       | 157 (93%) | 78 (76%) |                | <0.0001        |
| <i>Moved to mainstream housing</i>                                    | 0 (0%)              | 0 (0%)     | 0 (0%)     |                |                | 2 (1%)          | 3 (2%)    | 10 (10%) |                |                |
| <i>Moved from acute/long stay/hospital to supported accommodation</i> | 0 (0%)              | 0 (0%)     | 0 (0%)     |                |                | 1 (1%)          | 3 (2%)    | 2 (2%)   |                |                |
| <i>Moved to acute/long stay/hospital</i>                              | 1 (1%)              | 0 (0%)     | 0 (0%)     |                |                | 0 (0%)          | 1 (1%)    | 4 (4%)   |                |                |
| <i>Committed to bail/probation hostel/prison</i>                      | 0 (0%)              | 0 (0%)     | 0 (0%)     |                |                | 0 (0%)          | 0 (0%)    | 1 (1%)   |                |                |
| <i>No longer homeless</i>                                             | 1 (1%)              | 0 (0%)     | 0 (0%)     |                |                | 3 (2%)          | 2 (1%)    | 1 (1%)   |                |                |
| <i>Became homeless</i>                                                | 1 (1%)              | 0 (0%)     | 0 (0%)     |                |                | 1 (1%)          | 2 (1%)    | 1 (1%)   |                |                |
| <i>Other</i>                                                          | 3 (4%)              | 0 (0%)     | 0 (0%)     |                |                | 2 (1%)          | 0 (0%)    | 5 (5%)   |                |                |

**Table 3: Physical health assessments and interventions**

**N (%) individuals accepted onto the EIP pathway at each site who received listed physical health checks within 12 weeks, were offered interventions or took up interventions within 6 months of EIP referral. Excludes EIP to EIP transfers. P values from chi-squared test or Fisher's exact test as appropriate.**

|                                                       | Implementation site |                     |                     |         | Comparator Site     |                     |                     |         |
|-------------------------------------------------------|---------------------|---------------------|---------------------|---------|---------------------|---------------------|---------------------|---------|
|                                                       | Baseline<br>(n=69)  | Year One<br>(n=118) | Year Two<br>(n=124) | P value | Baseline<br>(n=145) | Year One<br>(n=168) | Year Two<br>(n=102) | P value |
| Physical health assessments received within 12 weeks: |                     |                     |                     |         |                     |                     |                     |         |
| <i>Physical Health (general)</i>                      | 33 (48%)            | 81 (69%)            | 86 (69%)            | 0.0038  | 38 (26%)            | 40 (24%)            | 44 (43%)            | 0.0019  |
| <i>Smoking</i>                                        | 23 (33%)            | 72 (61%)            | 76 (61%)            | 0.00033 | 38 (26%)            | 42 (25%)            | 34 (33%)            | 0.30    |
| <i>Substance Use</i>                                  | 35 (51%)            | 93 (79%)            | 98 (79%)            | <0.0001 | 71 (49%)            | 63 (38%)            | 66 (65%)            | <0.0001 |
| <i>Alcohol</i>                                        | 35 (51%)            | 89 (75%)            | 102 (82%)           | <0.0001 | 60 (41%)            | 60 (36%)            | 61 (60%)            | 0.00045 |
| <i>Weight</i>                                         | 17 (25%)            | 46 (39%)            | 60 (48%)            | 0.0065  | 46 (32%)            | 39 (23%)            | 39 (38%)            | 0.027   |
| <i>Waist</i>                                          | 4 (6%)              | 16 (14%)            | 27 (22%)            | 0.011   | 18 (12%)            | 9 (5%)              | 2 (2%)              | 0.0037  |
| <i>Pulse</i>                                          | 20 (29%)            | 48 (41%)            | 47 (38%)            | 0.30    | 25 (17%)            | 32 (19%)            | 33 (32%)            | 0.010   |
| <i>Blood Pressure</i>                                 | 22 (32%)            | 50 (42%)            | 55 (44%)            | 0.25    | 32 (22%)            | 38 (23%)            | 40 (39%)            | 0.0036  |
| <i>Bloods Taken</i>                                   | 18 (26%)            | 58 (49%)            | 50 (40%)            | 0.010   | 15 (10%)            | 25 (15%)            | 36 (35%)            | <0.0001 |
| <i>ECG</i>                                            | 10 (14%)            | 49 (42%)            | 27 (22%)            | <0.0001 | 17 (12%)            | 10 (6%)             | 30 (29%)            | <0.0001 |
| <i>NICE health check in 12 weeks</i>                  | 2 (3%)              | 9 (8%)              | 11 (9%)             | 0.30    | 1 (1%)              | 1 (1%)              | 1 (1%)              | 0.94    |
| Interventions offered at any time:                    |                     |                     |                     |         |                     |                     |                     |         |
| <i>Cognitive behaviour therapy</i>                    | 43 (62%)            | 68 (58%)            | 84 (68%)            | 0.26    | 1 (1%)              | 23 (14%)            | 22 (22%)            | <0.0001 |
| <i>Family intervention</i>                            | 36 (52%)            | 64 (54%)            | 80 (65%)            | 0.17    | 7 (5%)              | 7 (4%)              | 10 (10%)            | 0.13    |
| <i>Carer support</i>                                  | 50 (72%)            | 82 (69%)            | 90 (73%)            | 0.86    | 34 (23%)            | 29 (17%)            | 25 (25%)            | 0.26    |
| <i>Employment support</i>                             | 41 (59%)            | 47 (40%)            | 57 (46%)            | 0.043   | 37 (26%)            | 47 (28%)            | 18 (18%)            | 0.15    |
| Interventions taken up within 6 months:               |                     |                     |                     |         |                     |                     |                     |         |
| <i>Engagement</i>                                     | 52 (75%)            | 103 (87%)           | 111 (90%)           | 0.039   | 82 (57%)            | 74 (44%)            | 80 (79%)            | <0.0001 |
| <i>CBT for psychosis</i>                              | 3 (4%)              | 10 (8%)             | 8 (6%)              | 0.56    | 0 (0%)              | 7 (4%)              | 7 (7%)              | 0.010   |
| <i>Carer support</i>                                  | 24 (35%)            | 63 (53%)            | 84 (68%)            | <0.0001 | 17 (12%)            | 22 (13%)            | 16 (16%)            | 0.66    |
| <i>Medication</i>                                     | 37 (54%)            | 80 (68%)            | 91 (73%)            | 0.027   | 25 (17%)            | 37 (22%)            | 28 (28%)            | 0.16    |
| <i>Collaborative care planning</i>                    | 22 (32%)            | 85 (72%)            | 86 (69%)            | <0.0001 | 45 (31%)            | 38 (23%)            | 1 (1%)              | <0.0001 |
| <i>Physical Health</i>                                | 2 (3%)              | 4 (3%)              | 7 (6%)              | 0.58    | 37 (26%)            | 9 (5%)              | 15 (15%)            | <0.0001 |
| <i>Vocational</i>                                     | 14 (20%)            | 79 (67%)            | 89 (72%)            | <0.0001 | 29 (20%)            | 37 (22%)            | 39 (39%)            | 0.0023  |
| <i>Family work for psychosis</i>                      | 2 (3%)              | 11 (9%)             | 8 (6%)              | 0.25    | 2 (1%)              | 6 (4%)              | 1 (1%)              | 0.26    |
| <i>Any of these</i>                                   | 57 (83%)            | 113 (96%)           | 117 (94%)           | 0.0071  | 83 (57%)            | 74 (44%)            | 82 (81%)            | <0.0001 |

**Table 4: Acute care & clinical outcomes. Proportion of individuals accepted onto the EIP pathway at each trust experiencing acute care outcomes [n (%)] within 1 year of trust referral, and time to reach those outcomes where applicable [median (IQR)]. Excludes EIP to EIP transfers. P values for categorical comparisons from chi-squared test or Fisher's exact test as appropriate. P values for continuous data from Mann-Whitney U tests.**

|                                                                      | Implementation site    |                        |                       |                           |                           | Comparator site        |                        |                       |                           |                           |
|----------------------------------------------------------------------|------------------------|------------------------|-----------------------|---------------------------|---------------------------|------------------------|------------------------|-----------------------|---------------------------|---------------------------|
|                                                                      | Baseline<br>(n=69)     | Year One<br>(n=118)    | Year Two<br>(n=124)   | P value<br>Y1 vs baseline | P value<br>Y2 vs baseline | Baseline<br>(n=145)    | Year One<br>(n=168)    | Year Two<br>(n=102)   | P value<br>Y1 vs baseline | P value<br>Y2 vs baseline |
| Acute MH admission within 1 year of EIP referral                     | 27 (39%)               | 47 (40%)               | 36 (29%)              |                           | 0.16                      | 16 (11%)               | 21 (13%)               | 19 (19%)              |                           | 0.20                      |
| Time to acute admission<br>(where applicable) (weeks)                | 0.0<br>(0.0 to 10.0)   | 1.0<br>(0.0 to 7.0)    | 0.0<br>(0.0 to 3.5)   | 0.88                      | 0.11                      | 15.0<br>(3.0 to 41.0)  | 11.0<br>(2.0 to 41.0)  | 13.5<br>(3.0 to 34.0) | 0.82                      | 0.92                      |
| Time to acute MH/inpatient screening (hours)                         |                        |                        |                       |                           |                           |                        |                        |                       |                           |                           |
| 0 - 4                                                                | 21 (91%)               | 1 (100%)               | 14 (67%)              |                           | -                         | 11 (73%)               | 11 (58%)               | 8 (53%)               |                           | 0.49                      |
| 4 - 6                                                                | 0 (0%)                 | 0 (0%)                 | 6 (29%)               |                           |                           | 3 (20%)                | 4 (21%)                | 3 (20%)               |                           |                           |
| 6 - 8                                                                | 1 (4%)                 | 0 (0%)                 | 0 (0%)                |                           |                           | 0 (0%)                 | 2 (11%)                | 1 (7%)                |                           |                           |
| 8 - 10                                                               | 1 (4%)                 | 0 (0%)                 | 1 (5%)                |                           |                           | 1 (7%)                 | 2 (11%)                | 3 (20%)               |                           |                           |
| Time from acute admission to discharge<br>(where applicable) (weeks) | 4.5<br>(2.0 to 10.3)   | 4.0<br>(2.0 to 6.8)    | 3.0<br>(1.0 to 5.3)   | 0.42                      | 0.56                      | 3.0<br>(2.0 to 13.5)   | 3.0<br>(2.0 to 5.0)    | 3.0<br>(2.3 to 3.8)   | 0.56                      | 0.95                      |
| Number of subsequent acute admissions                                |                        |                        |                       |                           |                           |                        |                        |                       |                           |                           |
| None                                                                 | 18 (64%)               | 41 (85%)               | 25 (71%)              |                           | 0.091                     | 14 (67%)               | 15 (65%)               | 13 (62%)              |                           | 0.95                      |
| 1                                                                    | 6 (21%)                | 4 (8%)                 | 9 (26%)               |                           |                           | 5 (24%)                | 2 (9%)                 | 8 (38%)               |                           |                           |
| More than 1                                                          | 4 (14%)                | 3 (6%)                 | 1 (3%)                |                           |                           | 2 (10%)                | 6 (26%)                | 0 (0%)                |                           |                           |
| MHA section within 1 year of EIP referral                            | 25 (36%)               | 39 (33%)               | 34 (27%)              |                           | 0.58                      | 16 (11%)               | 21 (13%)               | 18 (18%)              |                           | 0.18                      |
| Contact acute MH services (post EIP)                                 | 32 (46%)               | 41 (35%)               | 37 (30%)              |                           | < 0.0001                  | 25 (17%)               | 30 (18%)               | 22 (22%)              |                           | < 0.0001                  |
| Crisis plan completed                                                | 35 (51%)               | 59 (50%)               | 44 (35%)              |                           | 0.032                     | 71 (49%)               | 69 (41%)               | 68 (67%)              |                           | 0.00023                   |
| Time to crisis plan completed (weeks)                                | 50.0<br>(15.0 to 79.0) | 22.5<br>(10.0 to 37.8) | 12.5<br>(6.0 to 22.8) | 0.0010                    | < 0.0001                  | 8.0<br>(1.0 to 23.0)   | 11.0<br>(1.0 to 39.0)  | 12.0<br>(2.0 to 34.3) | 0.36                      | 0.10                      |
| A&E attendance within 1 year of EIP referral                         | 7 (10%)                | 10 (8%)                | 11 (9%)               |                           | 0.91                      | 11 (8%)                | 12 (7%)                | 10 (10%)              |                           | 0.72                      |
| Time to A&E attendance (weeks)                                       | 21.0<br>(2.5 to 68.3)  | 8.5<br>(0.0 to 17.0)   | 13.0<br>(8.0 to 43.0) | 0.15                      | 0.88                      | 30.0<br>(25.0 to 41.0) | 44.0<br>(11.0 to 76.0) | 14.5<br>(7.3 to 31.5) | 0.87                      | 0.11                      |
| Reason for A&E attendance:                                           |                        |                        |                       |                           |                           |                        |                        |                       |                           |                           |

1  
2  
3  
4  
5  
6  
7  
8  
9  
10  
11  
12  
13  
14  
15  
16  
17  
18  
19  
20  
21  
22  
23  
24  
25  
26  
27  
28  
29  
30  
31  
32  
33  
34  
35  
36  
37  
38  
39  
40  
41  
42  
43  
44  
45  
46

|                                                                   | Implementation site |                     |                     |                           |                           | Comparator site     |                     |                     |                           |                           |
|-------------------------------------------------------------------|---------------------|---------------------|---------------------|---------------------------|---------------------------|---------------------|---------------------|---------------------|---------------------------|---------------------------|
|                                                                   | Baseline<br>(n=69)  | Year One<br>(n=118) | Year Two<br>(n=124) | P value<br>Y1 vs baseline | P value<br>Y2 vs baseline | Baseline<br>(n=145) | Year One<br>(n=168) | Year Two<br>(n=102) | P value<br>Y1 vs baseline | P value<br>Y2 vs baseline |
| <i>Deterioration in mental state</i>                              | 7 (41%)             | 7 (50%)             | 5 (42%)             | -                         | -                         | 2 (15%)             | 4 (24%)             | 2 (20%)             | -                         | -                         |
| <i>Selfharm/suicidal ideation/suicide attempt/overdose</i>        | 6 (35%)             | 5 (36%)             | 4 (33%)             |                           |                           | 10 (77%)            | 6 (35%)             | 4 (40%)             |                           |                           |
| <i>Alcohol/substance abuse</i>                                    | 1 (6%)              | 1 (7%)              | 2 (17%)             |                           |                           | 0 (0%)              | 1 (6%)              | 0 (0%)              |                           |                           |
| <i>Medication side effects</i>                                    | 0 (0%)              | 0 (0%)              | 0 (0%)              |                           |                           | 0 (0%)              | 1 (6%)              | 1 (10%)             |                           |                           |
| <i>Physical injury/illness (not apparently psychosis related)</i> | 3 (18%)             | 1 (7%)              | 1 (8%)              |                           |                           | 1 (8%)              | 5 (29%)             | 3 (30%)             |                           |                           |
| General hospital admission within 1 year of EIP referral          | 1 (1%)              | 4 (3%)              | 3 (2%)              | -                         | -                         | 2 (1%)              | 0 (0%)              | 4 (4%)              | -                         | -                         |
| Contact with criminal justice system whilst in EIP pathway        | 15 (22%)            | 34 (29%)            | 4 (3%)              | < 0.0001                  | < 0.0001                  | 20 (14%)            | 20 (12%)            | 21 (21%)            | < 0.0001                  | < 0.0001                  |
| Criminal conviction within 1 year of EIP referral                 | 1 (1%)              | 0 (0%)              | 0 (0%)              | -                         | -                         | 4 (3%)              | 4 (2%)              | 1 (1%)              | -                         | -                         |
| Deaths within 1 year of EIP referral                              | 0 (0%)              | 0 (0%)              | 0 (0%)              | -                         | -                         | 0 (0%)              | 0 (0%)              | 1 (1%)              | -                         | -                         |

**Table 5: Clinical outcomes (HoNoS). Mean (SD) change in HoNoS scores from referral to one year at each trust for patients accepted onto EIP pathway. Excludes EIP to EIP transfers. P values from paired t-tests.**

|                                                             | Implementation Site |                 |                 |                |                | Comparator Site |                 |                 |                |                |
|-------------------------------------------------------------|---------------------|-----------------|-----------------|----------------|----------------|-----------------|-----------------|-----------------|----------------|----------------|
|                                                             | Baseline            | Year One        | Year Two        | P value        | P value        | Baseline        | Year One        | Year Two        | P value        | P value        |
|                                                             | (n=52)              | (n=77)          | (n=53)          | Y1 vs baseline | Y2 vs baseline | (n=28)          | (n=16)          | (n=11)          | Y1 vs baseline | Y2 vs baseline |
| Change in HoNoS scores (from referral to 1 year)            |                     |                 |                 |                |                |                 |                 |                 |                |                |
| 1. Overactive, aggressive, disruptive or agitated behaviour | -0.56<br>(1.73)     | -0.43<br>(1.72) | -0.69<br>(1.45) | 0.59           | 0.78           | -0.43<br>(1.55) | -1.06<br>(1.65) | -0.09<br>(1.14) | *              | *              |
| 2. Non-accidental self injury                               | -0.50<br>(1.38)     | -0.22<br>(1.26) | -0.22<br>(1.15) | 0.18           | 0.21           | -0.25<br>(0.84) | -0.06<br>(1.29) | -0.36<br>(1.43) | *              | *              |
| 3. Problem drinking or drug taking                          | -0.40<br>(1.48)     | -0.15<br>(1.87) | 0.04<br>(1.71)  | 0.30           | 0.12           | 0.14<br>(1.04)  | -0.31<br>(1.20) | -0.10<br>(1.52) | *              | *              |
| 4. Cognitive problems                                       | -0.27<br>(1.34)     | -0.15<br>(1.32) | -0.06<br>(1.32) | 0.48           | 0.33           | -0.29<br>(1.18) | -0.38<br>(0.96) | -0.50<br>(1.51) | *              | *              |
| 5. Physical illness or disability problems                  | -0.23<br>(1.10)     | 0.03<br>(1.35)  | 0.02<br>(1.08)  | 0.19           | 0.17           | 0.11<br>(0.50)  | -0.38<br>(1.02) | 0.45<br>(1.44)  | *              | *              |
| 6. Problems associated with hallucinations and delusions    | -0.56<br>(1.62)     | -0.71<br>(1.70) | -0.11<br>(1.51) | 0.74           | 0.14           | -0.86<br>(1.46) | -1.81<br>(1.42) | -0.91<br>(1.76) | *              | *              |
| 7. Problems with depressed mood                             | -0.50<br>(1.59)     | -0.19<br>(1.49) | -0.55<br>(1.12) | 0.24           | 0.94           | -0.46<br>(1.29) | -0.88<br>(1.41) | -0.55<br>(1.21) | *              | *              |
| 8. Other mental and behavioural problems                    | -0.45<br>(1.53)     | -0.73<br>(1.81) | -0.27<br>(1.49) | 0.58           | 0.68           | -0.61<br>(1.26) | -0.75<br>(1.98) | -0.36<br>(1.69) | *              | *              |
| 9. Problems with relationships                              | -0.83<br>(1.32)     | -0.41<br>(1.51) | -0.20<br>(1.25) | 0.07           | 0.013          | -0.21<br>(1.26) | -1.00<br>(1.41) | -0.10<br>(0.57) | *              | *              |
| 10. Problems with activities of daily living                | -0.33<br>(1.57)     | -0.32<br>(1.55) | -0.46<br>(1.47) | 0.85           | 0.68           | -0.64<br>(1.16) | -1.00<br>(1.55) | 0.18<br>(0.75)  | *              | *              |
| 11. Problems with living conditions                         | -0.20<br>(1.51)     | -0.33<br>(1.44) | 0.08<br>(1.21)  | 0.69           | 0.28           | -0.36<br>(1.31) | -0.69<br>(1.20) | 0.45<br>(1.13)  | *              | *              |
| 12. Problems with occupation and activities                 | -0.33<br>(1.64)     | -0.19<br>(1.47) | 0.30<br>(1.45)  | 0.54           | 0.037          | -0.25<br>(1.58) | -1.06<br>(1.57) | -0.09<br>(1.45) | *              | *              |

\*p values not calculated due to amount of missing data

***TRIumPH: Treatment and Recovery In PsychHosis***

---

1  
2  
3  
4  
5  
6  
7  
8  
9  
10  
11  
12  
13  
14  
15  
16  
17  
18  
19  
20  
21  
22  
23  
24  
25  
26  
27  
28  
29  
30  
31  
32  
33  
34  
35  
36  
37  
38  
39  
40  
41  
42  
43  
44  
45  
46  
47  
48  
49  
50  
51  
52  
53  
54  
55  
56  
57  
58  
59  
60

For peer review only

# Routine Referral

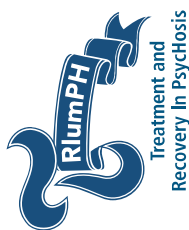



**Table 1: Staff survey results**  
Section A: Demographics

|                                   | Intervention arm    |                   |                   | Control arm         |                   |                   |
|-----------------------------------|---------------------|-------------------|-------------------|---------------------|-------------------|-------------------|
|                                   | Baseline<br>(n=438) | Year 1<br>(n=412) | Year 2<br>(n=418) | Baseline<br>(n=122) | Year 1<br>(n=155) | Year 2<br>(n=135) |
| Type of team                      |                     |                   |                   |                     |                   |                   |
| CMHT                              | 39%                 | 32%               | 30%               | 51%                 | 46%               | 49%               |
| EIP                               | 7%                  | 10%               | 8%                | 7%                  | 5%                | 9%                |
| Psychology                        | 5%                  | 6%                | 8%                | 2%                  | 1%                | 2%                |
| Inpatient                         | 35%                 | 42%               | 42%               | 30%                 | 35%               | 27%               |
| Hospital at home                  | 8%                  | 6%                | 8%                | 4%                  | 8%                | 7%                |
| Other (inc. AAT/AOT)              | 13%                 | 7%                | 8%                | 10%                 | 8%                | 9%                |
| Job role                          |                     |                   |                   |                     |                   |                   |
| Psychiatrist/SpR/SHO              | 15%                 | 7%                | 10%               | 5%                  | 6%                | 10%               |
| Psychologist/Psychotherapist      | 7%                  | 6%                | 8%                | 6%                  | 1%                | 2%                |
| Nurse practitioner                | 42%                 | 41%               | 39%               | 39%                 | 43%               | 34%               |
| Occupational therapist            | 4%                  | 6%                | 5%                | 7%                  | 8%                | 7%                |
| Social worker                     | 7%                  | 5%                | 5%                | 8%                  | 5%                | 8%                |
| Mental health care support worker | 19%                 | 25%               | 23%               | 20%                 | 22%               | 16%               |
| Other                             | 8%                  | 10%               | 10%               | 16%                 | 15%               | 22%               |
| Geographical area of living       |                     |                   |                   |                     |                   |                   |
| North Hampshire                   | 7%                  | 6%                | 11%               | 22%                 | 35%               | 24%               |
| West Hampshire                    | 24%                 | 23%               | 18%               | 20%                 | 11%               | 27%               |
| East Hampshire                    | 32%                 | 23%               | 21%               | 48%                 | 54%               | 47%               |
| Southampton                       | 36%                 | 43%               | 50%               | 8%                  | 0%                | 1%                |
| Unknown/other                     | 1%                  | 5%                | 0%                | 2%                  | 0%                | 0%                |
| Gender                            |                     |                   |                   |                     |                   |                   |
| Male                              | 32%                 | 33%               | 32%               | 31%                 | 39%               | 36%               |
| Female                            | 67%                 | 66%               | 67%               | 68%                 | 61%               | 64%               |
| Other                             | 0%                  | 0%                | <1%               | 0%                  | 0%                | 0%                |
| Not answered                      | 1%                  | 2%                | 1%                | 1%                  | 0%                | 0%                |
| Age group                         |                     |                   |                   |                     |                   |                   |
| Under 24                          | 5%                  | 5%                | 6%                | 6%                  | 5%                | 3%                |
| 25-34                             | 26%                 | 23%               | 25%               | 17%                 | 21%               | 24%               |
| 35-44                             | 30%                 | 28%               | 30%               | 29%                 | 21%               | 25%               |
| 45-54                             | 28%                 | 28%               | 27%               | 39%                 | 34%               | 36%               |
| 55-64                             | 9%                  | 14%               | 11%               | 8%                  | 17%               | 11%               |
| 65 or over                        | 1%                  | 1%                | 1%                | 0%                  | 1%                | 1%                |
| Not answered                      | 1%                  | 1%                | <1%               | 1%                  | 1%                | 0%                |
| Ethnicity                         |                     |                   |                   |                     |                   |                   |
| White                             | 82%                 | 80%               | 83%               | 92%                 | 94%               | 90%               |

|            | Intervention arm    |                   |                   | Control arm         |                   |                   |
|------------|---------------------|-------------------|-------------------|---------------------|-------------------|-------------------|
|            | Baseline<br>(n=438) | Year 1<br>(n=412) | Year 2<br>(n=418) | Baseline<br>(n=122) | Year 1<br>(n=155) | Year 2<br>(n=135) |
| Mixed race | 4%                  | 5%                | 5%                | 2%                  | 3%                | 3%                |
| Asian      | 6%                  | 5%                | 5%                | 1%                  | 1%                | 3%                |
| Black      | 5%                  | 9%                | 6%                | 3%                  | 1%                | 1%                |
| Other      | 1%                  | 1%                | 1%                | 0%                  | 1%                | 1%                |
| Not stated | <1%                 | 1%                | 1%                | 1%                  | 0%                | 1%                |

Section B: Experience

|                                                                                                             | Intervention arm    |                   |                   | Control arm         |                   |                   |
|-------------------------------------------------------------------------------------------------------------|---------------------|-------------------|-------------------|---------------------|-------------------|-------------------|
|                                                                                                             | Baseline<br>(n=438) | Year 1<br>(n=412) | Year 2<br>(n=418) | Baseline<br>(n=122) | Year 1<br>(n=155) | Year 2<br>(n=135) |
| I have been able to support people with FEP to have more control in their lives:                            |                     |                   |                   |                     |                   |                   |
| <i>Always</i>                                                                                               | 16%                 | 15%               | 18%               | 24%                 | 15%               | 16%               |
| <i>Sometimes</i>                                                                                            | 62%                 | 50%               | 54%               | 60%                 | 55%               | 55%               |
| <i>Rarely</i>                                                                                               | 13%                 | 14%               | 13%               | 8%                  | 12%               | 10%               |
| <i>Never</i>                                                                                                | 5%                  | 9%                | 6%                | 3%                  | 9%                | 6%                |
| <i>Don't know</i>                                                                                           | 3%                  | 7%                | 6%                | 2%                  | 6%                | 11%               |
| <i>Not answered</i>                                                                                         | 2%                  | 5%                | 3%                | 3%                  | 2%                | 2%                |
| I have been able to support people with FEP to manage their physical, mental and social needs holistically: |                     |                   |                   |                     |                   |                   |
| <i>Always</i>                                                                                               | 24%                 | 27%               | 27%               | 25%                 | 22%               | 22%               |
| <i>Sometimes</i>                                                                                            | 58%                 | 47%               | 49%               | 63%                 | 57%               | 54%               |
| <i>Rarely</i>                                                                                               | 9%                  | 8%                | 10%               | 3%                  | 6%                | 7%                |
| <i>Never</i>                                                                                                | 3%                  | 7%                | 5%                | 3%                  | 8%                | 5%                |
| <i>Don't know</i>                                                                                           | 2%                  | 8%                | 6%                | 0%                  | 6%                | 9%                |
| <i>Not answered</i>                                                                                         | 3%                  | 5%                | 3%                | 5%                  | 2%                | 3%                |
| I have been able to support people with FEP to involve carers:                                              |                     |                   |                   |                     |                   |                   |
| <i>Always</i>                                                                                               | 29%                 | 25%               | 27%               | 30%                 | 31%               | 31%               |
| <i>Sometimes</i>                                                                                            | 52%                 | 43%               | 43%               | 60%                 | 48%               | 47%               |
| <i>Rarely</i>                                                                                               | 9%                  | 11%               | 12%               | 4%                  | 8%                | 8%                |
| <i>Never</i>                                                                                                | 4%                  | 8%                | 6%                | 2%                  | 7%                | 4%                |
| <i>Don't know</i>                                                                                           | 2%                  | 8%                | 9%                | 1%                  | 5%                | 7%                |
| <i>Not answered</i>                                                                                         | 3%                  | 5%                | 4%                | 4%                  | 1%                | 3%                |
| I feel appropriately trained and supervised to deliver psychological informed interventions:                |                     |                   |                   |                     |                   |                   |
| <i>Always</i>                                                                                               | 22%                 | 21%               | 21%               | 16%                 | 12%               | 19%               |
| <i>Sometimes</i>                                                                                            | 47%                 | 40%               | 38%               | 52%                 | 42%               | 45%               |
| <i>Rarely</i>                                                                                               | 15%                 | 14%               | 11%               | 11%                 | 19%               | 11%               |
| <i>Never</i>                                                                                                | 7%                  | 10%               | 8%                | 13%                 | 7%                | 6%                |
| <i>Don't know</i>                                                                                           | 5%                  | 11%               | 10%               | 4%                  | 8%                | 10%               |
| <i>Not answered</i>                                                                                         | 4%                  | 5%                | 13%               | 3%                  | 1%                | 9%                |
| I feel appropriately trained and supervised to deliver physical health assessment and intervention:         |                     |                   |                   |                     |                   |                   |

1  
2  
3  
4  
5  
6  
7  
8  
9  
10  
11  
12  
13  
14  
15  
16  
17  
18  
19  
20  
21  
22  
23  
24  
25  
26  
27  
28  
29  
30  
31  
32  
33  
34  
35  
36  
37  
38  
39  
40  
41  
42  
43  
44  
45  
46

|                                                                                                       | Intervention arm    |                   |                   | Control arm         |                   |                   |
|-------------------------------------------------------------------------------------------------------|---------------------|-------------------|-------------------|---------------------|-------------------|-------------------|
|                                                                                                       | Baseline<br>(n=438) | Year 1<br>(n=412) | Year 2<br>(n=418) | Baseline<br>(n=122) | Year 1<br>(n=155) | Year 2<br>(n=135) |
| <i>Always</i>                                                                                         | 34%                 | 34%               | 29%               | 27%                 | 34%               | 37%               |
| <i>Sometimes</i>                                                                                      | 41%                 | 34%               | 39%               | 42%                 | 41%               | 33%               |
| <i>Rarely</i>                                                                                         | 12%                 | 10%               | 9%                | 14%                 | 10%               | 12%               |
| <i>Never</i>                                                                                          | 10%                 | 9%                | 8%                | 14%                 | 9%                | 7%                |
| <i>Don't know</i>                                                                                     | 3%                  | 8%                | 9%                | 2%                  | 3%                | 8%                |
| <i>Not answered</i>                                                                                   | 2%                  | 5%                | 6%                | 1%                  | 4%                | 3%                |
| I feel appropriately trained and supervised to deliver vocational support:                            |                     |                   |                   |                     |                   |                   |
| <i>Always</i>                                                                                         | 16%                 | 20%               | 15%               | 17%                 | 13%               | 19%               |
| <i>Sometimes</i>                                                                                      | 49%                 | 42%               | 44%               | 55%                 | 54%               | 51%               |
| <i>Rarely</i>                                                                                         | 23%                 | 16%               | 17%               | 19%                 | 21%               | 10%               |
| <i>Never</i>                                                                                          | 6%                  | 9%                | 9%                | 5%                  | 3%                | 7%                |
| <i>Don't know</i>                                                                                     | 4%                  | 10%               | 9%                | 3%                  | 5%                | 10%               |
| <i>Not answered</i>                                                                                   | 2%                  | 4%                | 6%                | 1%                  | 5%                | 3%                |
| I feel appropriately trained and supervised to deliver alcohol, smoking and substance misuse support: |                     |                   |                   |                     |                   |                   |
| <i>Always</i>                                                                                         | 22%                 | 22%               | 23%               | 30%                 | 22%               | 29%               |
| <i>Sometimes</i>                                                                                      | 58%                 | 46%               | 49%               | 50%                 | 58%               | 48%               |
| <i>Rarely</i>                                                                                         | 12%                 | 14%               | 11%               | 14%                 | 10%               | 10%               |
| <i>Never</i>                                                                                          | 5%                  | 5%                | 5%                | 5%                  | 4%                | 4%                |
| <i>Don't know</i>                                                                                     | 2%                  | 9%                | 9%                | 1%                  | 1%                | 7%                |
| <i>Not answered</i>                                                                                   | 1%                  | 4%                | 4%                | 1%                  | 5%                | 3%                |
| I believe service users and carers are involved in planning their care:                               |                     |                   |                   |                     |                   |                   |
| <i>Always</i>                                                                                         | 46%                 | 47%               | 45%               | 48%                 | 38%               | 47%               |
| <i>Sometimes</i>                                                                                      | 47%                 | 46%               | 47%               | 52%                 | 41%               | 52%               |
| <i>Rarely</i>                                                                                         | 4%                  | 2%                | 3%                | 1%                  | 4%                | 1%                |
| <i>Never</i>                                                                                          | 0%                  | 0%                | 1%                | 0%                  | 0%                | 0%                |
| <i>Don't know</i>                                                                                     | 1%                  | 3%                | 2%                | 0%                  | 2%                | 0%                |
| <i>Not answered</i>                                                                                   | 2%                  | 2%                | 2%                | 0%                  | 15%               | 1%                |
| I feel supported to carry out holistic assessment and care plans:                                     |                     |                   |                   |                     |                   |                   |
| <i>Always</i>                                                                                         | 44%                 | 42%               | 43%               | 46%                 | 47%               | 40%               |
| <i>Sometimes</i>                                                                                      | 39%                 | 36%               | 34%               | 43%                 | 34%               | 44%               |
| <i>Rarely</i>                                                                                         | 5%                  | 6%                | 4%                | 3%                  | 8%                | 5%                |
| <i>Never</i>                                                                                          | 3%                  | 5%                | 5%                | 4%                  | 2%                | 1%                |
| <i>Don't know</i>                                                                                     | 3%                  | 6%                | 8%                | 2%                  | 5%                | 5%                |
| <i>Not answered</i>                                                                                   | 6%                  | 5%                | 6%                | 2%                  | 5%                | 4%                |

## STROBE Statement—checklist of items that should be included in reports of observational studies

|                              | Item No | Recommendation                                                                                                                                                                                                                                                                                                                                                                                                                                                         | Page No         |
|------------------------------|---------|------------------------------------------------------------------------------------------------------------------------------------------------------------------------------------------------------------------------------------------------------------------------------------------------------------------------------------------------------------------------------------------------------------------------------------------------------------------------|-----------------|
| <b>Title and abstract</b>    | 1       | (a) Indicate the study's design with a commonly used term in the title or the abstract                                                                                                                                                                                                                                                                                                                                                                                 | 1               |
|                              |         | (b) Provide in the abstract an informative and balanced summary of what was done and what was found                                                                                                                                                                                                                                                                                                                                                                    | 2               |
| <b>Introduction</b>          |         |                                                                                                                                                                                                                                                                                                                                                                                                                                                                        |                 |
| Background/rationale         | 2       | Explain the scientific background and rationale for the investigation being reported                                                                                                                                                                                                                                                                                                                                                                                   | 4               |
| Objectives                   | 3       | State specific objectives, including any prespecified hypotheses                                                                                                                                                                                                                                                                                                                                                                                                       | 6               |
| <b>Methods</b>               |         |                                                                                                                                                                                                                                                                                                                                                                                                                                                                        |                 |
| Study design                 | 4       | Present key elements of study design early in the paper                                                                                                                                                                                                                                                                                                                                                                                                                | 6               |
| Setting                      | 5       | Describe the setting, locations, and relevant dates, including periods of recruitment, exposure, follow-up, and data collection                                                                                                                                                                                                                                                                                                                                        | 6               |
| Participants                 | 6       | (a) <i>Cohort study</i> —Give the eligibility criteria, and the sources and methods of selection of participants. Describe methods of follow-up<br><i>Case-control study</i> —Give the eligibility criteria, and the sources and methods of case ascertainment and control selection. Give the rationale for the choice of cases and controls<br><i>Cross-sectional study</i> —Give the eligibility criteria, and the sources and methods of selection of participants | 7/8             |
|                              |         | (b) <i>Cohort study</i> —For matched studies, give matching criteria and number of exposed and unexposed<br><i>Case-control study</i> —For matched studies, give matching criteria and the number of controls per case                                                                                                                                                                                                                                                 |                 |
| Variables                    | 7       | Clearly define all outcomes, exposures, predictors, potential confounders, and effect modifiers. Give diagnostic criteria, if applicable                                                                                                                                                                                                                                                                                                                               | 8               |
| Data sources/<br>measurement | 8*      | For each variable of interest, give sources of data and details of methods of assessment (measurement). Describe comparability of assessment methods if there is more than one group                                                                                                                                                                                                                                                                                   | NA <sup>+</sup> |
| Bias                         | 9       | Describe any efforts to address potential sources of bias                                                                                                                                                                                                                                                                                                                                                                                                              | 17-<br>19       |
| Study size                   | 10      | Explain how the study size was arrived at                                                                                                                                                                                                                                                                                                                                                                                                                              | 8               |
| Quantitative variables       | 11      | Explain how quantitative variables were handled in the analyses. If applicable, describe which groupings were chosen and why                                                                                                                                                                                                                                                                                                                                           | 9               |
| Statistical methods          | 12      | (a) Describe all statistical methods, including those used to control for confounding                                                                                                                                                                                                                                                                                                                                                                                  | 9               |
|                              |         | (b) Describe any methods used to examine subgroups and interactions                                                                                                                                                                                                                                                                                                                                                                                                    | 9               |
|                              |         | (c) Explain how missing data were addressed                                                                                                                                                                                                                                                                                                                                                                                                                            | 9               |
|                              |         | (d) <i>Cohort study</i> —If applicable, explain how loss to follow-up was addressed<br><i>Case-control study</i> —If applicable, explain how matching of cases and controls was addressed<br><i>Cross-sectional study</i> —If applicable, describe analytical methods taking account of sampling strategy                                                                                                                                                              | 9               |
|                              |         | (e) Describe any sensitivity analyses                                                                                                                                                                                                                                                                                                                                                                                                                                  |                 |

1  
2  
3  
4  
5  
6  
7  
8  
9  
10  
11  
12  
13  
14  
15  
16  
17  
18  
19  
20  
21  
22  
23  
24  
25  
26  
27  
28  
29  
30  
31  
32  
33  
34  
35  
36  
37  
38  
39  
40  
41  
42  
43  
44  
45  
46  
47  
48  
49  
50  
51  
52  
53  
54  
55  
56  
57  
58  
59  
60

| <b>Results</b>           |     |                                                                                                                                                                                                                                                                                                                                                                                                               |                 |
|--------------------------|-----|---------------------------------------------------------------------------------------------------------------------------------------------------------------------------------------------------------------------------------------------------------------------------------------------------------------------------------------------------------------------------------------------------------------|-----------------|
| Participants             | 13* | (a) Report numbers of individuals at each stage of study—eg numbers potentially eligible, examined for eligibility, confirmed eligible, included in the study, completing follow-up, and analysed<br>(b) Give reasons for non-participation at each stage<br>(c) Consider use of a flow diagram                                                                                                               | Table 1         |
| Descriptive data         | 14* | (a) Give characteristics of study participants (eg demographic, clinical, social) and information on exposures and potential confounders<br>(b) Indicate number of participants with missing data for each variable of interest<br>(c) <i>Cohort study</i> —Summarise follow-up time (eg, average and total amount)                                                                                           | Table 1         |
| Outcome data             | 15* | <i>Cohort study</i> —Report numbers of outcome events or summary measures over time<br><i>Case-control study</i> —Report numbers in each exposure category, or summary measures of exposure<br><i>Cross-sectional study</i> —Report numbers of outcome events or summary measures                                                                                                                             | Tables          |
| Main results             | 16  | (a) Give unadjusted estimates and, if applicable, confounder-adjusted estimates and their precision (eg, 95% confidence interval). Make clear which confounders were adjusted for and why they were included<br>(b) Report category boundaries when continuous variables were categorized<br>(c) If relevant, consider translating estimates of relative risk into absolute risk for a meaningful time period | Tables          |
| Other analyses           | 17  | Report other analyses done—eg analyses of subgroups and interactions, and sensitivity analyses                                                                                                                                                                                                                                                                                                                | Tables<br>Pg 10 |
| <b>Discussion</b>        |     |                                                                                                                                                                                                                                                                                                                                                                                                               |                 |
| Key results              | 18  | Summarise key results with reference to study objectives                                                                                                                                                                                                                                                                                                                                                      | 19              |
| Limitations              | 19  | Discuss limitations of the study, taking into account sources of potential bias or imprecision. Discuss both direction and magnitude of any potential bias                                                                                                                                                                                                                                                    | 19              |
| Interpretation           | 20  | Give a cautious overall interpretation of results considering objectives, limitations, multiplicity of analyses, results from similar studies, and other relevant evidence                                                                                                                                                                                                                                    | 17              |
| Generalisability         | 21  | Discuss the generalisability (external validity) of the study results                                                                                                                                                                                                                                                                                                                                         | 19              |
| <b>Other information</b> |     |                                                                                                                                                                                                                                                                                                                                                                                                               |                 |
| Funding                  | 22  | Give the source of funding and the role of the funders for the present study and, if applicable, for the original study on which the present article is based                                                                                                                                                                                                                                                 | 19              |

\*Give information separately for cases and controls in case-control studies and, if applicable, for exposed and unexposed groups in cohort and cross-sectional studies.

**Note:** An Explanation and Elaboration article discusses each checklist item and gives methodological background and published examples of transparent reporting. The STROBE checklist is best used in conjunction with this article (freely available on the Web sites of PLoS Medicine at <http://www.plosmedicine.org/>, Annals of Internal Medicine at <http://www.annals.org/>, and Epidemiology at <http://www.epidem.com/>). Information on the STROBE Initiative is available at [www.strobe-statement.org](http://www.strobe-statement.org).

+ Not possible as data collected from various sources across intervention and comparator site (depending on how information collected by services in real world setting). Data dictionary produced for researchers to allow for this.
