# Supplementary material for: Results of a prospective, mixed methods study to assess feasibility, acceptability and effectiveness of TRIumPH (Treatment and Recovery In PsycHosis): an integrated care pathway for psychosis, compared to usual treatment
Source: PubMed Central journal article supplement — BMJ Open. 2020 Apr 29;10(4):e033711. doi: 10.1136/bmjopen-2019-033711 (PMC7213857; doi:10.1136/bmjopen-2019-033711), 2020-04-29
Supplement: bmjopen-2019-033711supp001.pdf [file bmjopen-2019-033711supp001.pdf]

**Table 1: Staff survey results**

## Section A: Demographics

|                                   | Intervention arm    |                   |                   | Control arm         |                   |                   |
|-----------------------------------|---------------------|-------------------|-------------------|---------------------|-------------------|-------------------|
|                                   | Baseline<br>(n=438) | Year 1<br>(n=412) | Year 2<br>(n=418) | Baseline<br>(n=122) | Year 1<br>(n=155) | Year 2<br>(n=135) |
| Type of team                      |                     |                   |                   |                     |                   |                   |
| CMHT                              | 39%                 | 32%               | 30%               | 51%                 | 46%               | 49%               |
| EIP                               | 7%                  | 10%               | 8%                | 7%                  | 5%                | 9%                |
| Psychology                        | 5%                  | 6%                | 8%                | 2%                  | 1%                | 2%                |
| Inpatient                         | 35%                 | 42%               | 42%               | 30%                 | 35%               | 27%               |
| Hospital at home                  | 8%                  | 6%                | 8%                | 4%                  | 8%                | 7%                |
| Other (inc. AAT/AOT)              | 13%                 | 7%                | 8%                | 10%                 | 8%                | 9%                |
| Job role                          |                     |                   |                   |                     |                   |                   |
| Psychiatrist/SpR/SHO              | 15%                 | 7%                | 10%               | 5%                  | 6%                | 10%               |
| Psychologist/Psychotherapist      | 7%                  | 6%                | 8%                | 6%                  | 1%                | 2%                |
| Nurse practitioner                | 42%                 | 41%               | 39%               | 39%                 | 43%               | 34%               |
| Occupational therapist            | 4%                  | 6%                | 5%                | 7%                  | 8%                | 7%                |
| Social worker                     | 7%                  | 5%                | 5%                | 8%                  | 5%                | 8%                |
| Mental health care support worker | 19%                 | 25%               | 23%               | 20%                 | 22%               | 16%               |
| Other                             | 8%                  | 10%               | 10%               | 16%                 | 15%               | 22%               |
| Geographical area of living       |                     |                   |                   |                     |                   |                   |
| North Hampshire                   | 7%                  | 6%                | 11%               | 22%                 | 35%               | 24%               |
| West Hampshire                    | 24%                 | 23%               | 18%               | 20%                 | 11%               | 27%               |
| East Hampshire                    | 32%                 | 23%               | 21%               | 48%                 | 54%               | 47%               |
| Southampton                       | 36%                 | 43%               | 50%               | 8%                  | 0%                | 1%                |
| Unknown/other                     | 1%                  | 5%                | 0%                | 2%                  | 0%                | 0%                |
| Gender                            |                     |                   |                   |                     |                   |                   |
| Male                              | 32%                 | 33%               | 32%               | 31%                 | 39%               | 36%               |
| Female                            | 67%                 | 66%               | 67%               | 68%                 | 61%               | 64%               |
| Other                             | 0%                  | 0%                | <1%               | 0%                  | 0%                | 0%                |
| Not answered                      | 1%                  | 2%                | 1%                | 1%                  | 0%                | 0%                |
| Age group                         |                     |                   |                   |                     |                   |                   |
| Under 24                          | 5%                  | 5%                | 6%                | 6%                  | 5%                | 3%                |
| 25-34                             | 26%                 | 23%               | 25%               | 17%                 | 21%               | 24%               |
| 35-44                             | 30%                 | 28%               | 30%               | 29%                 | 21%               | 25%               |
| 45-54                             | 28%                 | 28%               | 27%               | 39%                 | 34%               | 36%               |
| 55-64                             | 9%                  | 14%               | 11%               | 8%                  | 17%               | 11%               |
| 65 or over                        | 1%                  | 1%                | 1%                | 0%                  | 1%                | 1%                |
| Not answered                      | 1%                  | 1%                | <1%               | 1%                  | 1%                | 0%                |
| Ethnicity                         |                     |                   |                   |                     |                   |                   |
| White                             | 82%                 | 80%               | 83%               | 92%                 | 94%               | 90%               |

|            | Intervention arm    |                   |                   | Control arm         |                   |                   |
|------------|---------------------|-------------------|-------------------|---------------------|-------------------|-------------------|
|            | Baseline<br>(n=438) | Year 1<br>(n=412) | Year 2<br>(n=418) | Baseline<br>(n=122) | Year 1<br>(n=155) | Year 2<br>(n=135) |
| Mixed race | 4%                  | 5%                | 5%                | 2%                  | 3%                | 3%                |
| Asian      | 6%                  | 5%                | 5%                | 1%                  | 1%                | 3%                |
| Black      | 5%                  | 9%                | 6%                | 3%                  | 1%                | 1%                |
| Other      | 1%                  | 1%                | 1%                | 0%                  | 1%                | 1%                |
| Not stated | <1%                 | 1%                | 1%                | 1%                  | 0%                | 1%                |

## Section B: Experience

|                                                                                                             | Intervention arm    |                   |                   | Control arm         |                   |                   |
|-------------------------------------------------------------------------------------------------------------|---------------------|-------------------|-------------------|---------------------|-------------------|-------------------|
|                                                                                                             | Baseline<br>(n=438) | Year 1<br>(n=412) | Year 2<br>(n=418) | Baseline<br>(n=122) | Year 1<br>(n=155) | Year 2<br>(n=135) |
| I have been able to support people with FEP to have more control in their lives:                            |                     |                   |                   |                     |                   |                   |
| <i>Always</i>                                                                                               | 16%                 | 15%               | 18%               | 24%                 | 15%               | 16%               |
| <i>Sometimes</i>                                                                                            | 62%                 | 50%               | 54%               | 60%                 | 55%               | 55%               |
| <i>Rarely</i>                                                                                               | 13%                 | 14%               | 13%               | 8%                  | 12%               | 10%               |
| <i>Never</i>                                                                                                | 5%                  | 9%                | 6%                | 3%                  | 9%                | 6%                |
| <i>Don't know</i>                                                                                           | 3%                  | 7%                | 6%                | 2%                  | 6%                | 11%               |
| <i>Not answered</i>                                                                                         | 2%                  | 5%                | 3%                | 3%                  | 2%                | 2%                |
| I have been able to support people with FEP to manage their physical, mental and social needs holistically: |                     |                   |                   |                     |                   |                   |
| <i>Always</i>                                                                                               | 24%                 | 27%               | 27%               | 25%                 | 22%               | 22%               |
| <i>Sometimes</i>                                                                                            | 58%                 | 47%               | 49%               | 63%                 | 57%               | 54%               |
| <i>Rarely</i>                                                                                               | 9%                  | 8%                | 10%               | 3%                  | 6%                | 7%                |
| <i>Never</i>                                                                                                | 3%                  | 7%                | 5%                | 3%                  | 8%                | 5%                |
| <i>Don't know</i>                                                                                           | 2%                  | 8%                | 6%                | 0%                  | 6%                | 9%                |
| <i>Not answered</i>                                                                                         | 3%                  | 5%                | 3%                | 5%                  | 2%                | 3%                |
| I have been able to support people with FEP to involve carers:                                              |                     |                   |                   |                     |                   |                   |
| <i>Always</i>                                                                                               | 29%                 | 25%               | 27%               | 30%                 | 31%               | 31%               |
| <i>Sometimes</i>                                                                                            | 52%                 | 43%               | 43%               | 60%                 | 48%               | 47%               |
| <i>Rarely</i>                                                                                               | 9%                  | 11%               | 12%               | 4%                  | 8%                | 8%                |
| <i>Never</i>                                                                                                | 4%                  | 8%                | 6%                | 2%                  | 7%                | 4%                |
| <i>Don't know</i>                                                                                           | 2%                  | 8%                | 9%                | 1%                  | 5%                | 7%                |
| <i>Not answered</i>                                                                                         | 3%                  | 5%                | 4%                | 4%                  | 1%                | 3%                |
| I feel appropriately trained and supervised to deliver psychological informed interventions:                |                     |                   |                   |                     |                   |                   |
| <i>Always</i>                                                                                               | 22%                 | 21%               | 21%               | 16%                 | 12%               | 19%               |
| <i>Sometimes</i>                                                                                            | 47%                 | 40%               | 38%               | 52%                 | 42%               | 45%               |
| <i>Rarely</i>                                                                                               | 15%                 | 14%               | 11%               | 11%                 | 19%               | 11%               |
| <i>Never</i>                                                                                                | 7%                  | 10%               | 8%                | 13%                 | 7%                | 6%                |
| <i>Don't know</i>                                                                                           | 5%                  | 11%               | 10%               | 4%                  | 8%                | 10%               |
| <i>Not answered</i>                                                                                         | 4%                  | 5%                | 13%               | 3%                  | 1%                | 9%                |
| I feel appropriately trained and supervised to deliver physical health assessment and intervention:         |                     |                   |                   |                     |                   |                   |

|                                                                                                       | Intervention arm    |                   |                   | Control arm         |                   |                   |
|-------------------------------------------------------------------------------------------------------|---------------------|-------------------|-------------------|---------------------|-------------------|-------------------|
|                                                                                                       | Baseline<br>(n=438) | Year 1<br>(n=412) | Year 2<br>(n=418) | Baseline<br>(n=122) | Year 1<br>(n=155) | Year 2<br>(n=135) |
| <i>Always</i>                                                                                         | 34%                 | 34%               | 29%               | 27%                 | 34%               | 37%               |
| <i>Sometimes</i>                                                                                      | 41%                 | 34%               | 39%               | 42%                 | 41%               | 33%               |
| <i>Rarely</i>                                                                                         | 12%                 | 10%               | 9%                | 14%                 | 10%               | 12%               |
| <i>Never</i>                                                                                          | 10%                 | 9%                | 8%                | 14%                 | 9%                | 7%                |
| <i>Don't know</i>                                                                                     | 3%                  | 8%                | 9%                | 2%                  | 3%                | 8%                |
| <i>Not answered</i>                                                                                   | 2%                  | 5%                | 6%                | 1%                  | 4%                | 3%                |
| I feel appropriately trained and supervised to deliver vocational support:                            |                     |                   |                   |                     |                   |                   |
| <i>Always</i>                                                                                         | 16%                 | 20%               | 15%               | 17%                 | 13%               | 19%               |
| <i>Sometimes</i>                                                                                      | 49%                 | 42%               | 44%               | 55%                 | 54%               | 51%               |
| <i>Rarely</i>                                                                                         | 23%                 | 16%               | 17%               | 19%                 | 21%               | 10%               |
| <i>Never</i>                                                                                          | 6%                  | 9%                | 9%                | 5%                  | 3%                | 7%                |
| <i>Don't know</i>                                                                                     | 4%                  | 10%               | 9%                | 3%                  | 5%                | 10%               |
| <i>Not answered</i>                                                                                   | 2%                  | 4%                | 6%                | 1%                  | 5%                | 3%                |
| I feel appropriately trained and supervised to deliver alcohol, smoking and substance misuse support: |                     |                   |                   |                     |                   |                   |
| <i>Always</i>                                                                                         | 22%                 | 22%               | 23%               | 30%                 | 22%               | 29%               |
| <i>Sometimes</i>                                                                                      | 58%                 | 46%               | 49%               | 50%                 | 58%               | 48%               |
| <i>Rarely</i>                                                                                         | 12%                 | 14%               | 11%               | 14%                 | 10%               | 10%               |
| <i>Never</i>                                                                                          | 5%                  | 5%                | 5%                | 5%                  | 4%                | 4%                |
| <i>Don't know</i>                                                                                     | 2%                  | 9%                | 9%                | 1%                  | 1%                | 7%                |
| <i>Not answered</i>                                                                                   | 1%                  | 4%                | 4%                | 1%                  | 5%                | 3%                |
| I believe service users and carers are involved in planning their care:                               |                     |                   |                   |                     |                   |                   |
| <i>Always</i>                                                                                         | 46%                 | 47%               | 45%               | 48%                 | 38%               | 47%               |
| <i>Sometimes</i>                                                                                      | 47%                 | 46%               | 47%               | 52%                 | 41%               | 52%               |
| <i>Rarely</i>                                                                                         | 4%                  | 2%                | 3%                | 1%                  | 4%                | 1%                |
| <i>Never</i>                                                                                          | 0%                  | 0%                | 1%                | 0%                  | 0%                | 0%                |
| <i>Don't know</i>                                                                                     | 1%                  | 3%                | 2%                | 0%                  | 2%                | 0%                |
| <i>Not answered</i>                                                                                   | 2%                  | 2%                | 2%                | 0%                  | 15%               | 1%                |
| I feel supported to carry out holistic assessment and care plans:                                     |                     |                   |                   |                     |                   |                   |
| <i>Always</i>                                                                                         | 44%                 | 42%               | 43%               | 46%                 | 47%               | 40%               |
| <i>Sometimes</i>                                                                                      | 39%                 | 36%               | 34%               | 43%                 | 34%               | 44%               |
| <i>Rarely</i>                                                                                         | 5%                  | 6%                | 4%                | 3%                  | 8%                | 5%                |
| <i>Never</i>                                                                                          | 3%                  | 5%                | 5%                | 4%                  | 2%                | 1%                |
| <i>Don't know</i>                                                                                     | 3%                  | 6%                | 8%                | 2%                  | 5%                | 5%                |
| <i>Not answered</i>                                                                                   | 6%                  | 5%                | 6%                | 2%                  | 5%                | 4%                |
